# Supplementary material for: Photolytic degradation of Alzheimer's amyloid Aβ42-fibrils by sialic acid decorated glycodendrimers
Source: Research Square preprint supplement (doi:10.21203/rs.3.rs-6562396/v1), 2025-05-07

## **SUPPORTING INFORMATION**

# **Photolytic degradation of Alzheimer's amyloid A $\beta$ <sub>42</sub>-fibrils by sialic acid decorated glycodendrimers**

Rituparna Das,<sup>a</sup> Swarnendu Roy,<sup>b</sup> Rahul Das,<sup>b\*</sup> Balaram Mukhopadhyay<sup>a\*</sup>

<sup>a</sup>*Sweet Lab, Department of Chemical Sciences, Indian Institute of Science Education and Research Kolkata, Mohanpur, Nadia 741246, India*

<sup>b</sup>*Molecular Signaling Group, Department of Biological Sciences, Indian Institute of Science Education and Research Kolkata, Mohanpur, Nadia 741246. India*

## Contents

| No. | Description                                                                                                            | Page No. |
|-----|------------------------------------------------------------------------------------------------------------------------|----------|
| 1.  | The glycodendrimers exhibits low inherent toxicity and cellular uptake in HEK293 cells ( <b>Figure S1</b> )            | S-3      |
| 2.  | The theoretical hydrodynamic radius and radius of gyration for the A $\beta$ <sub>42</sub> monomer ( <b>Table S1</b> ) | S-4      |
| 3.  | Copy of the <sup>1</sup> H NMR spectrum of compound <b>3</b>                                                           | S-5      |
| 4.  | Copy of the <sup>13</sup> C NMR spectrum of compound <b>3</b>                                                          | S-6      |
| 5.  | Copy of the <sup>1</sup> H NMR spectrum of compound <b>4</b>                                                           | S-7      |
| 6.  | Copy of the <sup>13</sup> C NMR spectrum of compound <b>4</b>                                                          | S-8      |
| 7.  | Copy of the <sup>1</sup> H NMR spectrum of compound <b>8</b>                                                           | S-9      |
| 8.  | Copy of the <sup>13</sup> C NMR spectrum of compound <b>8</b>                                                          | S-10     |
| 9.  | Copy of the <sup>1</sup> H NMR spectrum of compound <b>9</b>                                                           | S-11     |
| 10. | Copy of the <sup>13</sup> C NMR spectrum of compound <b>9</b>                                                          | S-12     |
| 11. | Copy of the <sup>1</sup> H NMR spectrum of compound <b>11</b>                                                          | S-13     |
| 12. | Copy of the <sup>13</sup> C NMR spectrum of compound <b>11</b>                                                         | S-14     |
| 13. | Copy of the <sup>1</sup> H NMR spectrum of compound <b>12</b>                                                          | S-15     |
| 14. | Copy of the <sup>13</sup> C NMR spectrum of compound <b>12</b>                                                         | S-16     |
| 15. | Copy of the <sup>1</sup> H NMR spectrum of compound <b>13</b>                                                          | S-17     |
| 16. | Copy of the <sup>13</sup> C NMR spectrum of compound <b>13</b>                                                         | S-18     |
| 17. | Copy of the <sup>1</sup> H NMR spectrum of compound <b>15</b>                                                          | S-19     |
| 18. | Copy of the <sup>13</sup> C NMR spectrum of compound <b>15</b>                                                         | S-20     |
| 19. | Copy of the <sup>1</sup> H NMR spectrum of compound <b>16</b>                                                          | S-21     |
| 20. | Copy of the <sup>13</sup> C NMR spectrum of compound <b>16</b>                                                         | S-22     |
| 21. | Copy of the <sup>1</sup> H NMR spectrum of compound <b>17</b>                                                          | S-23     |
| 22. | Copy of the <sup>13</sup> C NMR spectrum of compound <b>17</b>                                                         | S-24     |
| 23. | Copy of the <sup>1</sup> H NMR spectrum of compound <b>1</b>                                                           | S-25     |
| 24. | Copy of the <sup>13</sup> C NMR spectrum of compound <b>1</b>                                                          | S-26     |
| 25. | Copy of the <sup>1</sup> H NMR spectrum of compound <b>2</b>                                                           | S-27     |
| 26. | Copy of the <sup>13</sup> C NMR spectrum of compound <b>2</b>                                                          | S-28     |
| 27. | Copy of the MALDI-TOF Mass spectrum of compound <b>1</b>                                                               | S-29     |
| 28. | Copy of the MALDI-TOF Mass spectrum of compound <b>2</b>                                                               | S-30     |

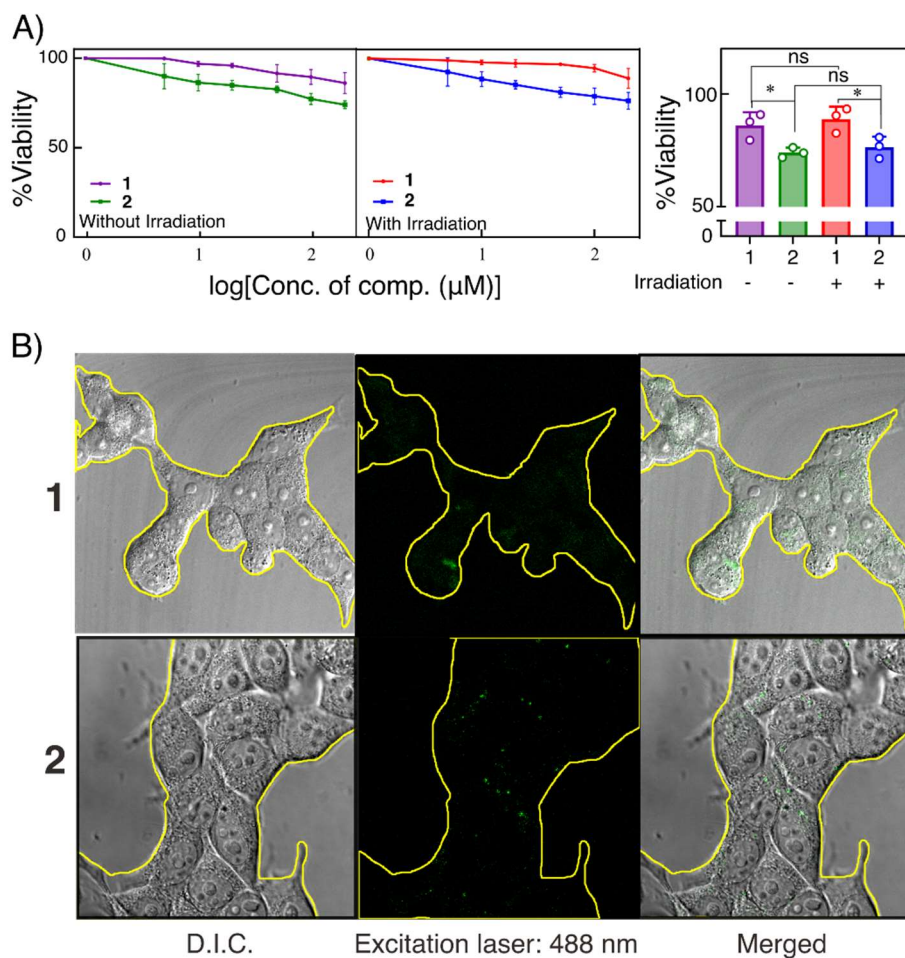

**Figure S1:** The glycodendrimers exhibits low inherent toxicity and cellular uptake in HEK293 cells.

A) Cytotoxicity of **1** and **2** studied in HEK293 cells with and without irradiation. The points represent percentage viability at each compound concentration (left). The bar represents the cell viability after incubation (48 hours) and irradiation (15 minutes) (right). The error bars represent the S.D. from three separate experiments.

B). Cellular uptake of **1** and **2** in HEK293 cells studied using confocal microscopy. The DIC image (left) was superimposed on the fluorescence image (middle) to produce the merged image (right). The yellow lines indicate the cell membrane.

**Table S1:** The theoretical hydrodynamic radius and radius of gyration for the A $\beta$ <sub>42</sub> monomer and oligomers were calculated using Hullrad algorithm (Sl. No.: 1-11). The PDB IDs 6SZF (monomer) and 5KK3(18 A $\beta$ <sub>42</sub> fibrils) were used for the calculation. The data was linearly extrapolated to obtain the number of fibrils approximately required to form a A $\beta$ <sub>42</sub> oligomer with 100 nm radius (as obtained using DLS measurements).

| Sl. no. | No. of Amino Acids | Fibrils                       | Radius of Gyration (nm) | Hydrodynamic radius(nm)     |
|---------|--------------------|-------------------------------|-------------------------|-----------------------------|
| 1       | 42                 | 1                             | 1.658                   | 1.542                       |
| 2       | 576                | 18                            | 2.203                   | 3.046                       |
| 3       | 1152               | 36                            | 2.939                   | 3.759                       |
| 4       | 1728               | 54                            | 4.121                   | 4.44                        |
| 5       | 2304               | 72                            | 5.24                    | 4.977                       |
| 6       | 2880               | 90                            | 6.402                   | 5.483                       |
| 7       | 5760               | 180                           | 12.641                  | 7.594                       |
| 8       | 8640               | 270                           | 19.020                  | 9.379                       |
| 9       | 12672              | 396                           | 27.843                  | 12.353                      |
| 10      | 23616              | 738                           | 50.565                  | 16.486                      |
| 11      | 44352              | 1386                          | 94.969                  | 24.001                      |
| 12      | ~192000            | ~6000<br>(Extrapolated Value) | ~400                    | ~100<br>(Obtained from DLS) |



BM-RD-PORPHYRIN in CDCl<sub>3</sub>

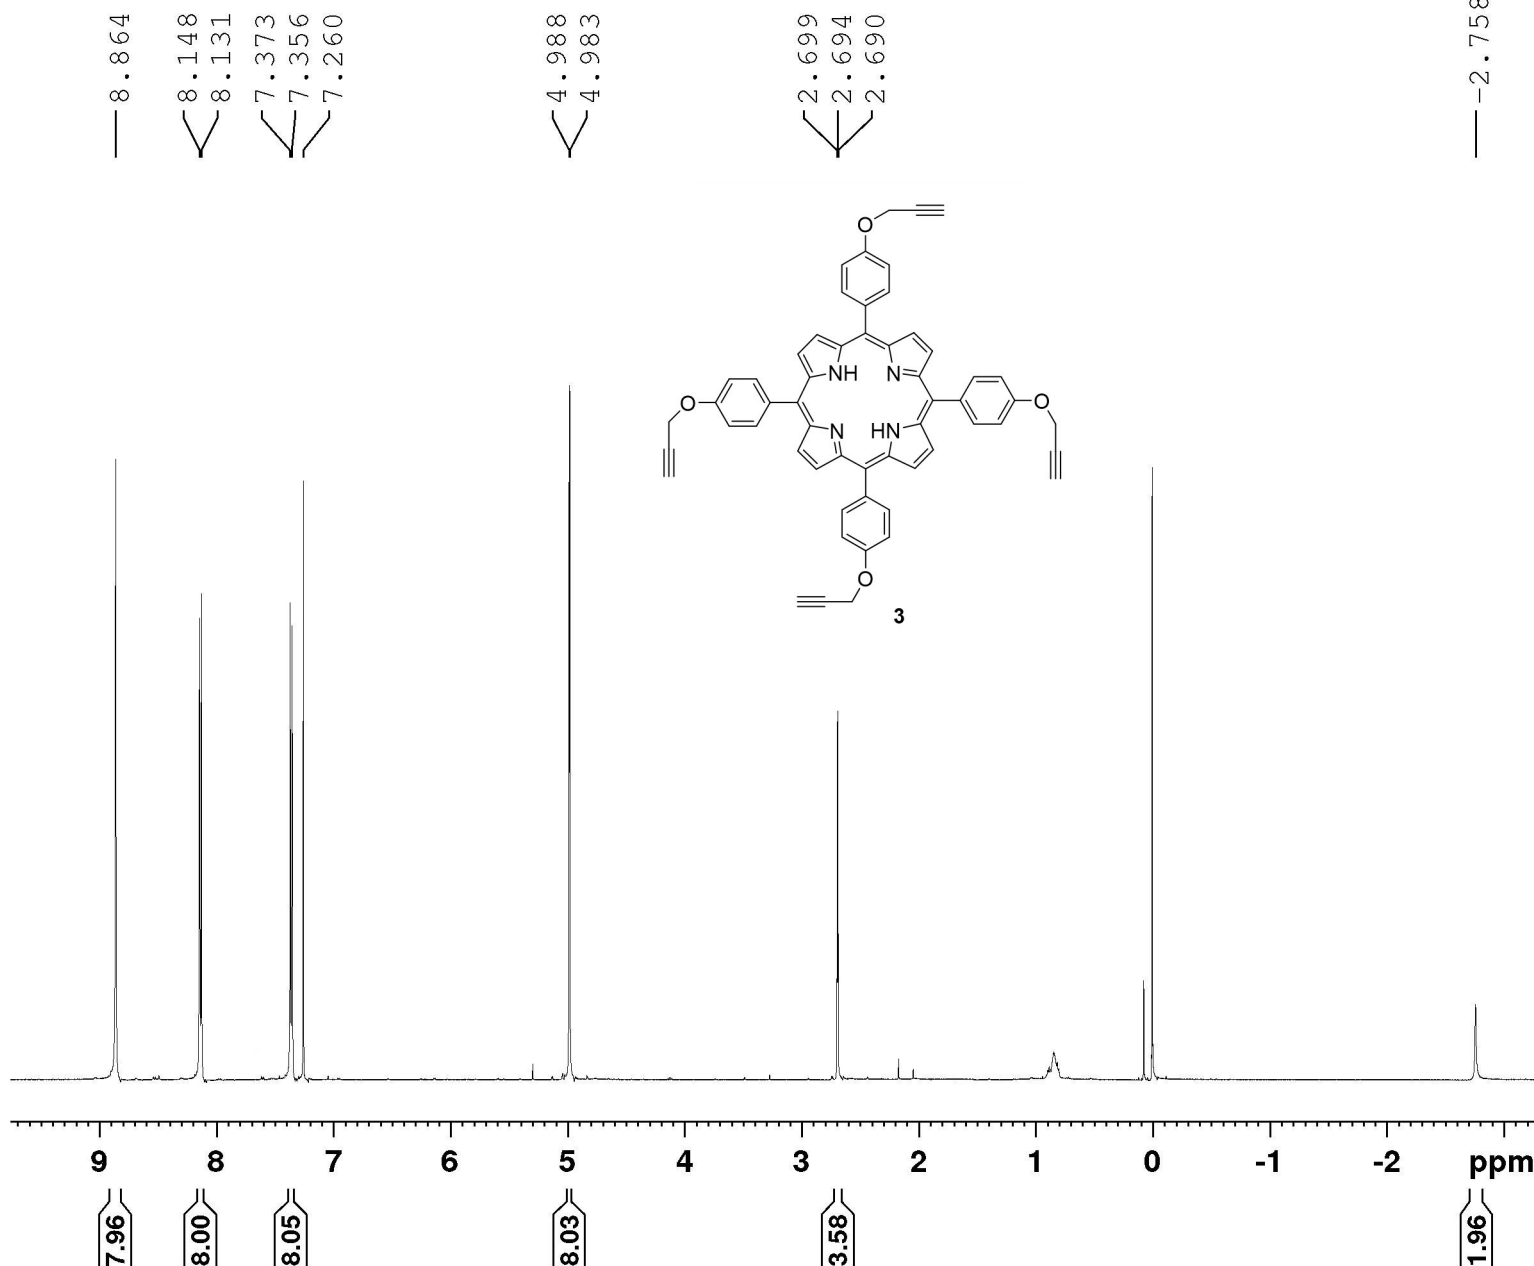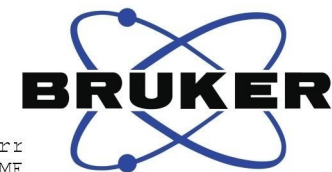

Cur  
NAME  
EXPNO 90  
PROCNO 1

F2 - Acquisition Parameters  
Date\_ 20150518  
Time 15.21  
INSTRUM spect  
PROBHD 5 mm PABBO BB-  
PULPROG zg30  
TD 65536  
SOLVENT CDCl<sub>3</sub>  
NS 16  
DS 2  
SWH 15000.000 Hz  
FIDRES 0.228882 Hz  
AQ 2.1845334 sec  
RG 203  
DW 33.333 usec  
DE 6.50 usec  
TE 1381.7 K  
D1 1.00000000 sec  
TD0 1

===== CHANNEL f1 =====  
NUC1 1H  
P1 14.25 usec  
PL1 1.30 dB  
PL1W 15.30635643 W  
SFO1 500.2325012 MHz

F2 - Processing parameters  
SI 131072  
SF 500.2300158 MHz  
WDW EM  
SSB 0  
LB 0.30 Hz  
GB 0  
PC 1.00

BM-RD-PORPHYRIN in CDCl<sub>3</sub>

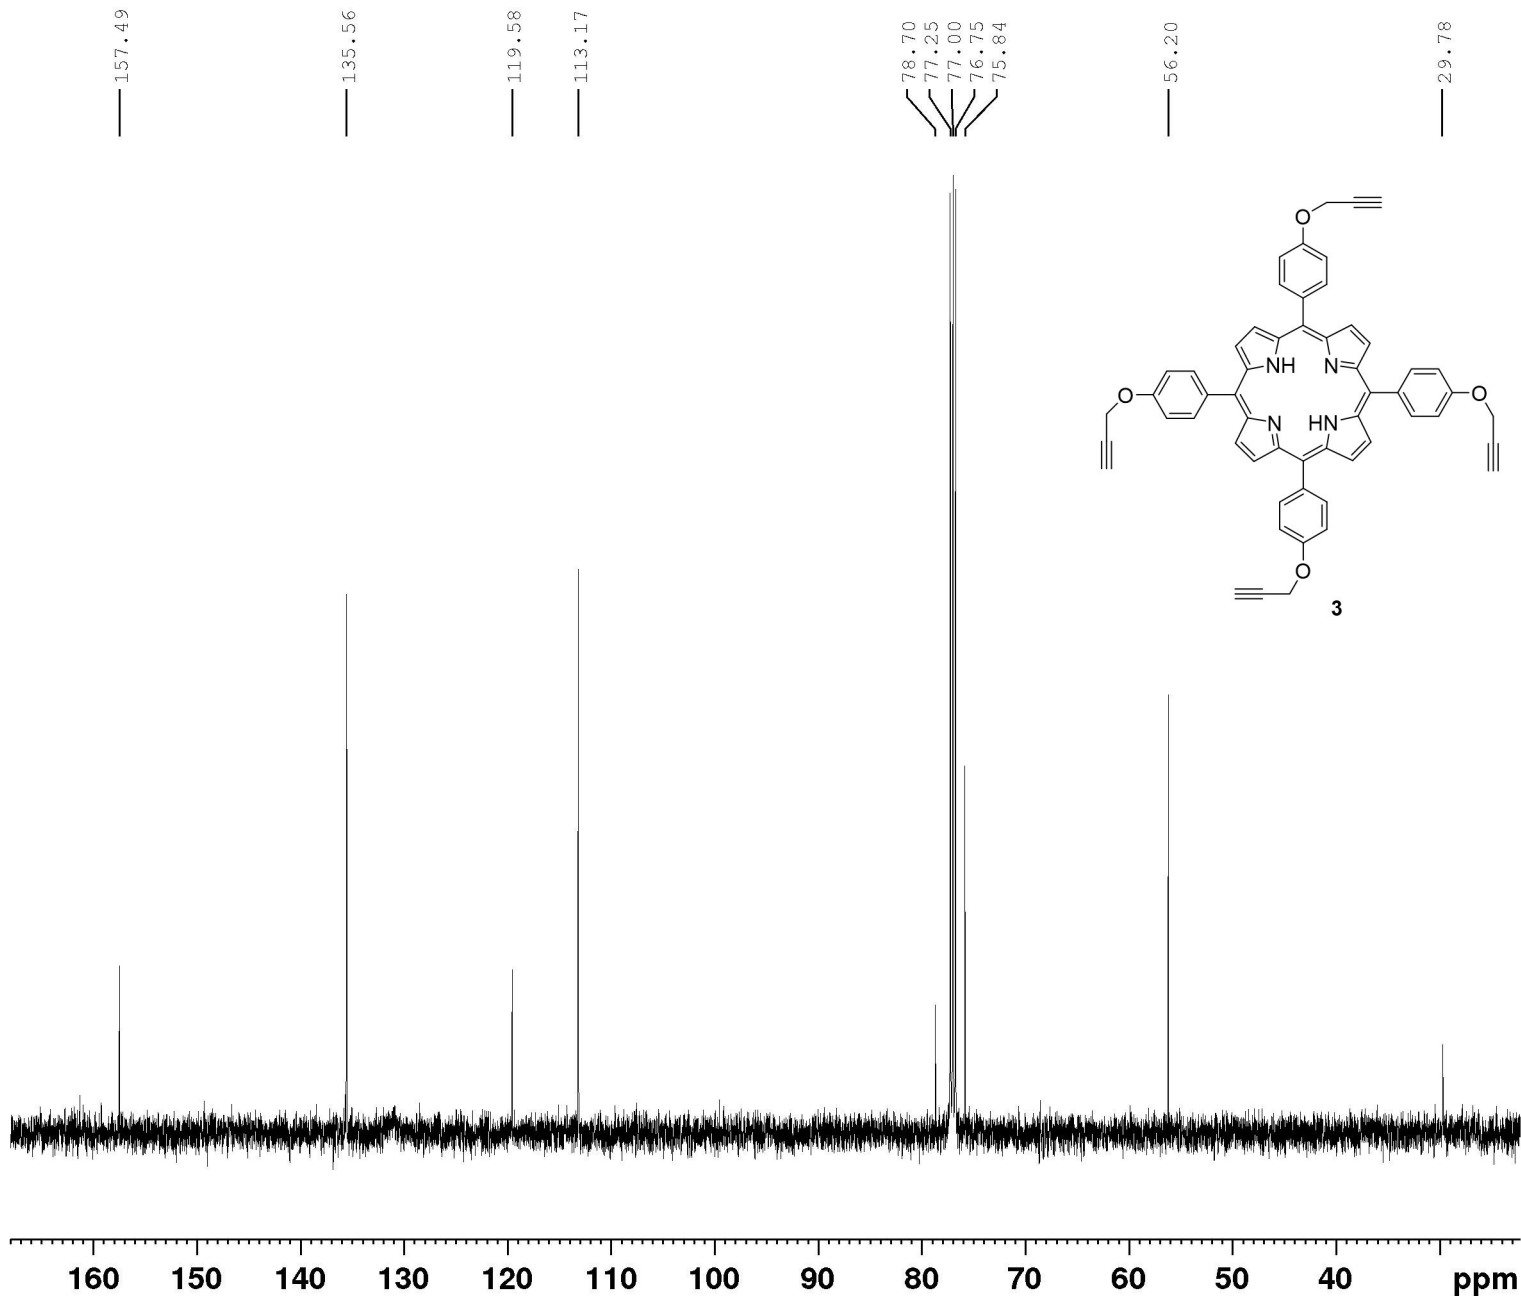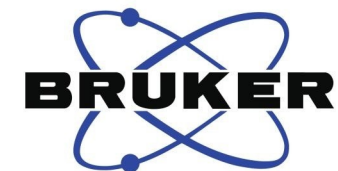

Current Data Parameters  
 NAME BM-RD-PORPHYRIN  
 EXPNO 91  
 PROCNO 1

F2 - Acquisition Parameters  
 Date\_ 20150518  
 Time 15.27  
 INSTRUM spect  
 PROBHD 5 mm PABBO BB-  
 PULPROG zgdc  
 TD 65536  
 SOLVENT CDCl<sub>3</sub>  
 NS 262  
 DS 4  
 SWH 29761.904 Hz  
 FIDRES 0.454131 Hz  
 AQ 1.1010048 sec  
 RG 203  
 DW 16.800 usec  
 DE 6.50 usec  
 TE 1380.7 K  
 D1 2.00000000 sec  
 D11 0.03000000 sec  
 TD0 1

===== CHANNEL f1 =====  
 NUC1 13C  
 P1 9.50 usec  
 PL1 -0.50 dB  
 PL1W 90.18825531 W  
 SFO1 125.7955118 MHz

===== CHANNEL f2 =====  
 CPDPRG[2] waltz16  
 NUC2 1H  
 PCPD2 80.00 usec  
 PL2 1.30 dB  
 PL12 16.00 dB  
 PL2W 15.30635643 W  
 PL12W 0.51864696 W  
 SFO2 500.2320009 MHz

F2 - Processing parameters  
 SI 32768  
 SF 125.7829351 MHz  
 WDW EM  
 SSB 0  
 LB 1.00 Hz  
 GB 0  
 PC 1.40

BM-RD-ZINCP in CDCl<sub>3</sub>

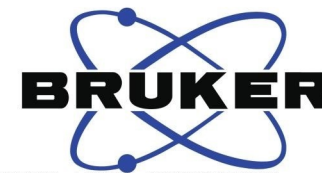

Current Data Parameters  
 NAME BM-RD-ZINCP  
 EXPNO 140  
 PROCNO 1

F2 - Acquisition Parameters  
 Date\_ 20150525  
 Time 12.24  
 INSTRUM spect  
 PROBHD 5 mm PABBO BB-  
 PULPROG zg30  
 TD 65536  
 SOLVENT CDCl<sub>3</sub>  
 NS 32  
 DS 2  
 SWH 10000.000 Hz  
 FIDRES 0.152588 Hz  
 AQ 3.2767999 sec  
 RG 203  
 DW 50.000 usec  
 DE 6.50 usec  
 TE 1237.8 K  
 D1 1.00000000 sec  
 TD0 1

===== CHANNEL f1 =====  
 NUC1 1H  
 P1 14.25 usec  
 PL1 1.30 dB  
 PL1W 15.30635643 W  
 SFO1 500.2325012 MHz

F2 - Processing parameters  
 SI 131072  
 SF 500.2300156 MHz  
 WDW EM  
 SSB 0  
 LB 0.30 Hz  
 GB 0  
 PC 1.00

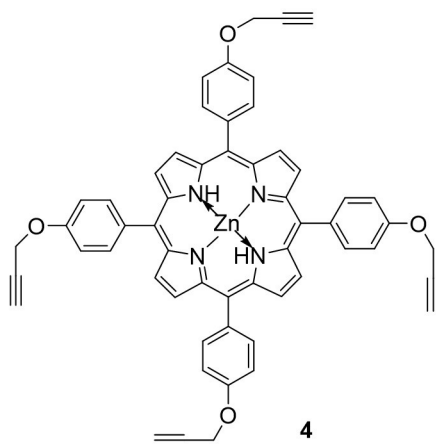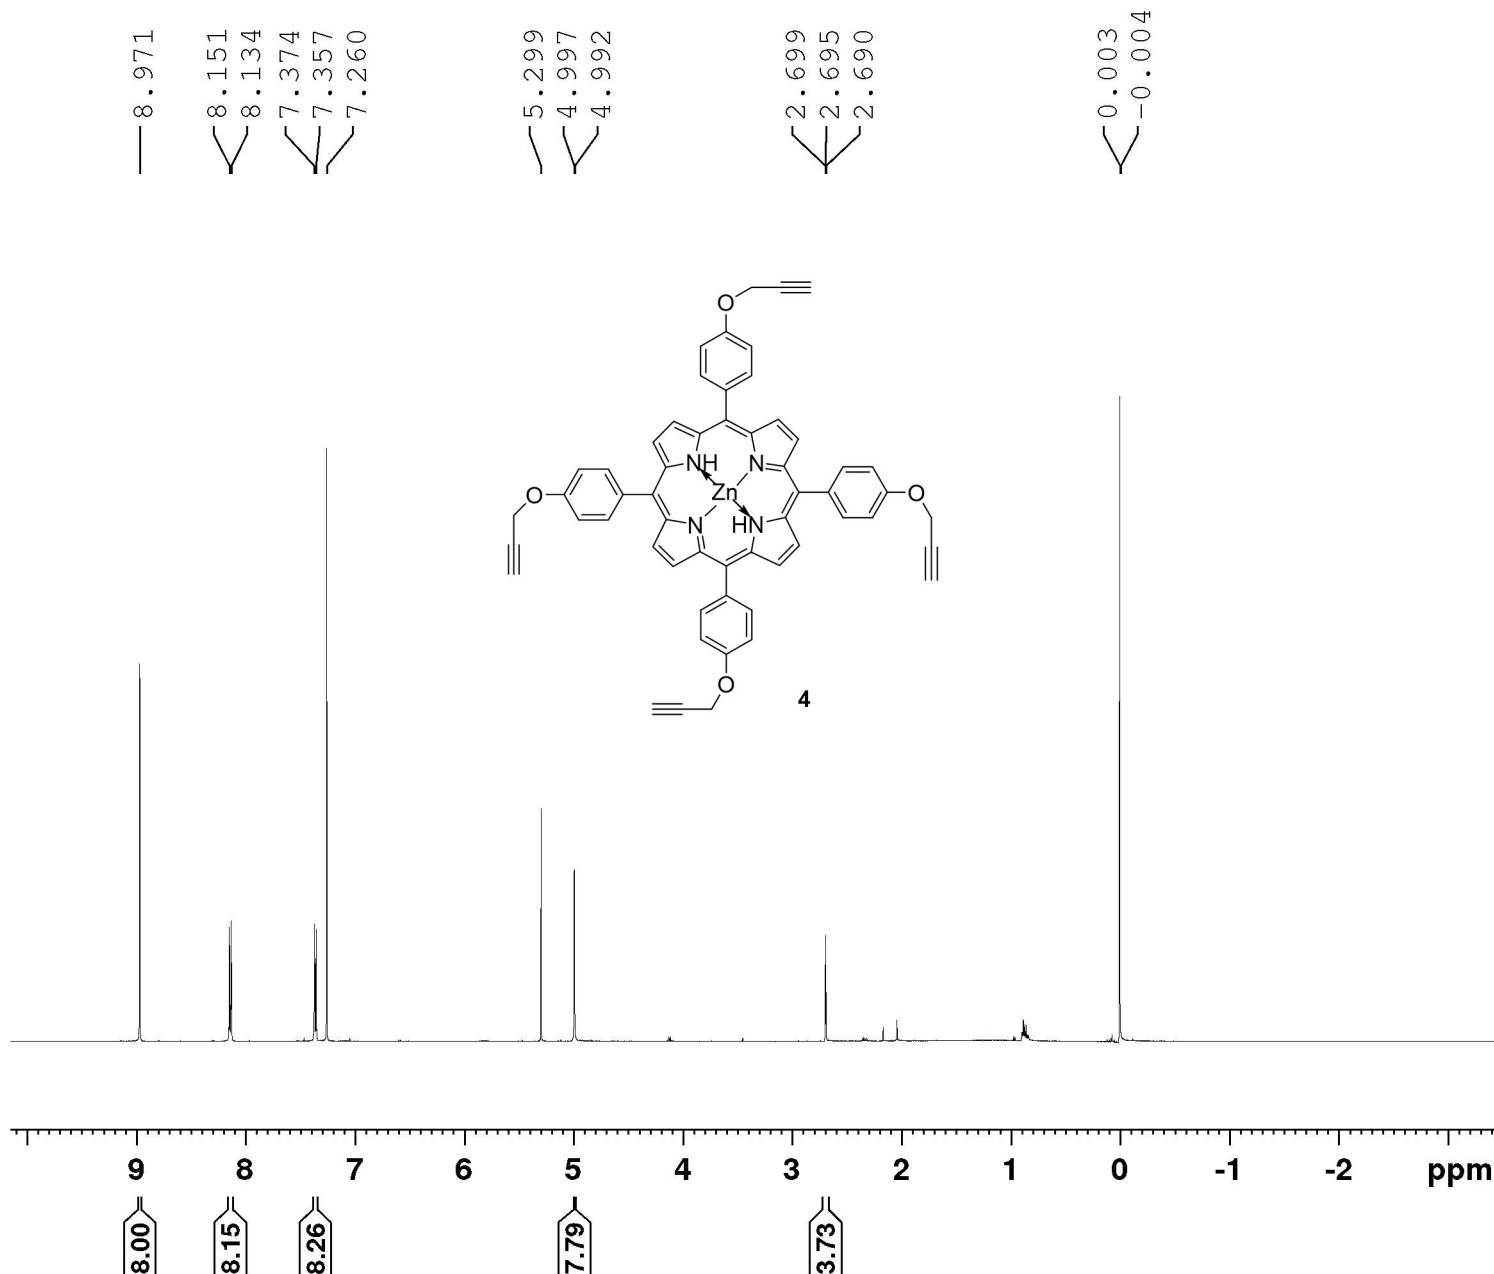

BM-RD-ZINCP in CDCl<sub>3</sub>

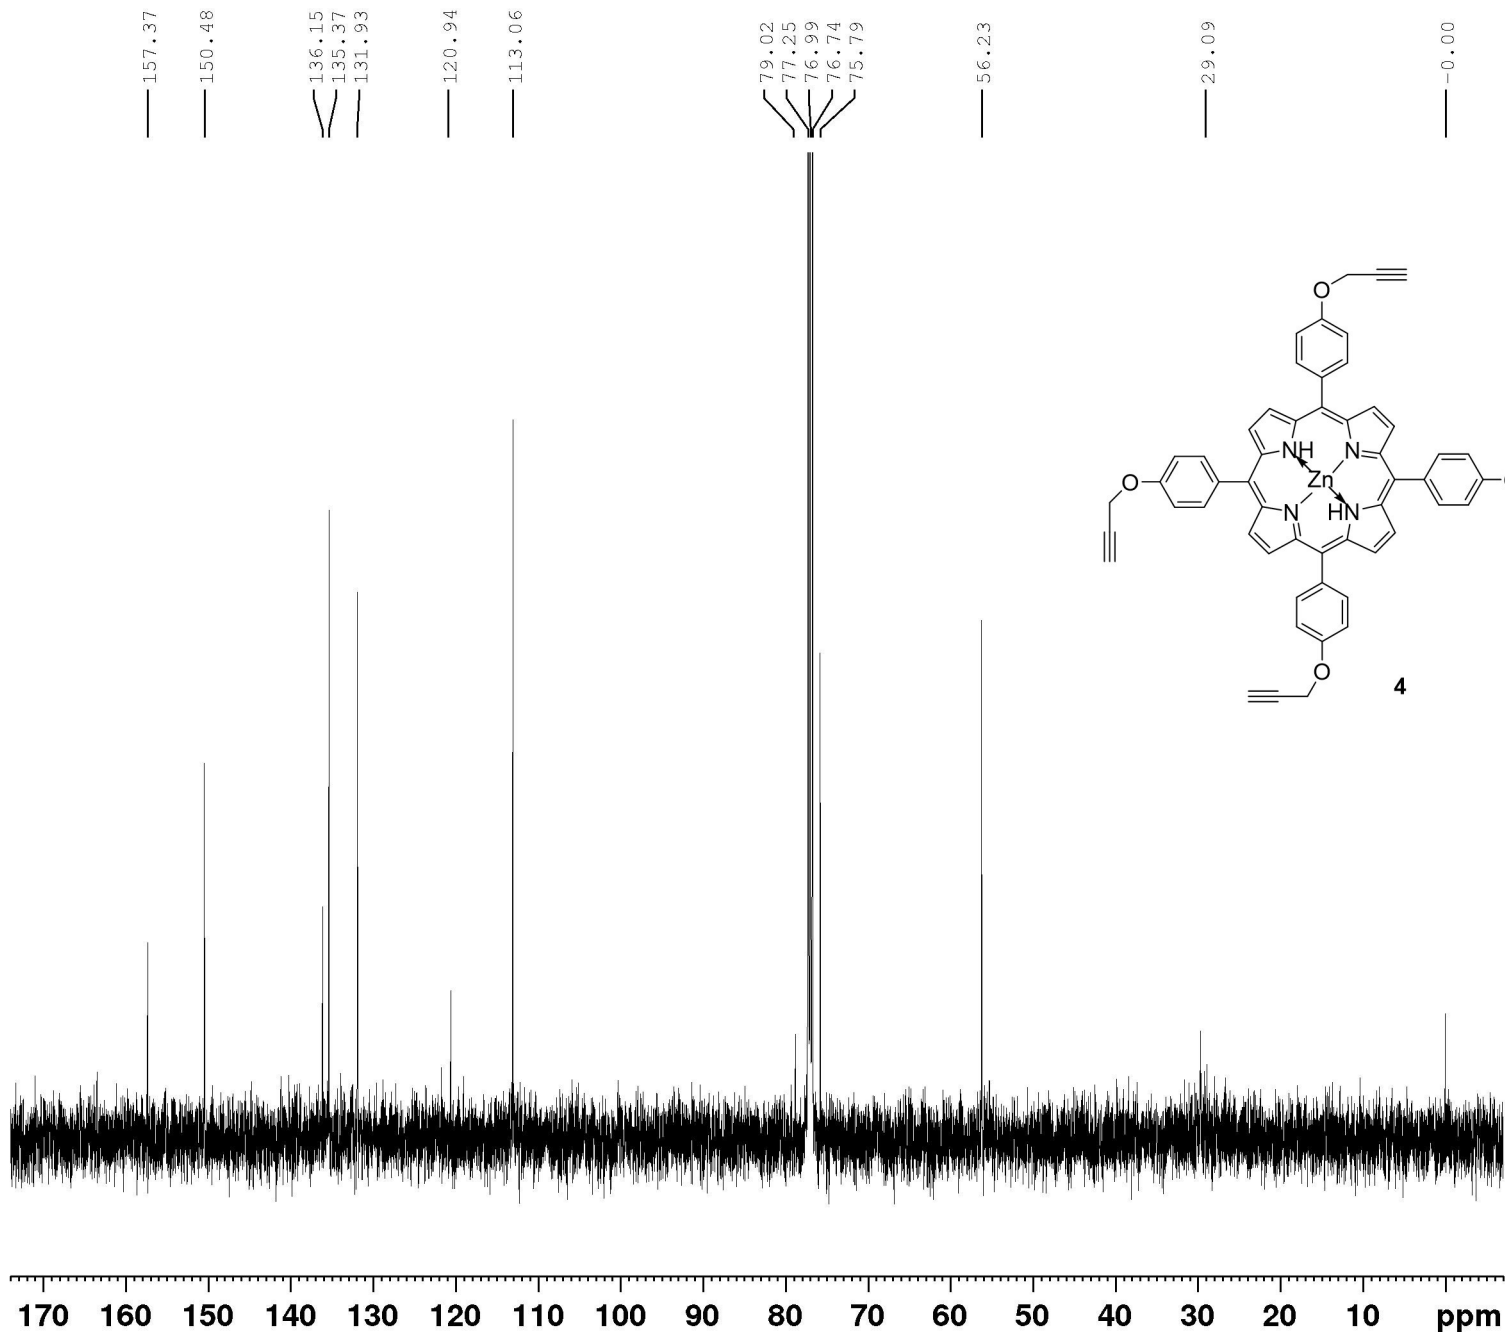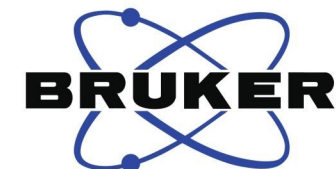

Current Data Parameters  
 NAME BM-RD-ZINCP  
 EXPNO 141  
 PROCNO 1

F2 - Acquisition Parameters  
 Date\_ 20150525  
 Time 12.33  
 INSTRUM spect  
 PROBHD 5 mm PABBO BB-  
 PULPROG zgdc  
 TD 65536  
 SOLVENT CDCl<sub>3</sub>  
 NS 1024  
 DS 4  
 SWH 29761.904 Hz  
 FIDRES 0.454131 Hz  
 AQ 1.1010048 sec  
 RG 203  
 DW 16.800 usec  
 DE 6.50 usec  
 TE 1233.8 K  
 D1 2.00000000 sec  
 D11 0.03000000 sec  
 TD0 1

===== CHANNEL f1 =====  
 NUC1 13C  
 P1 9.50 usec  
 PL1 -0.50 dB  
 PL1W 90.18825531 W  
 SFO1 125.7955118 MHz

===== CHANNEL f2 =====  
 CPDPRG[2] waltz16  
 NUC2 1H  
 PCPD2 80.00 usec  
 PL2 1.30 dB  
 PL12 16.00 dB  
 PL2W 15.30635643 W  
 PL12W 0.51864696 W  
 SFO2 500.2320009 MHz

F2 - Processing parameters  
 SI 32768  
 SF 125.7829343 MHz  
 WDW EM  
 SSB 0  
 LB 1.00 Hz  
 GB 0  
 PC 1.40

GROUP BM  
BM-RD-031 in CDCl<sub>3</sub>

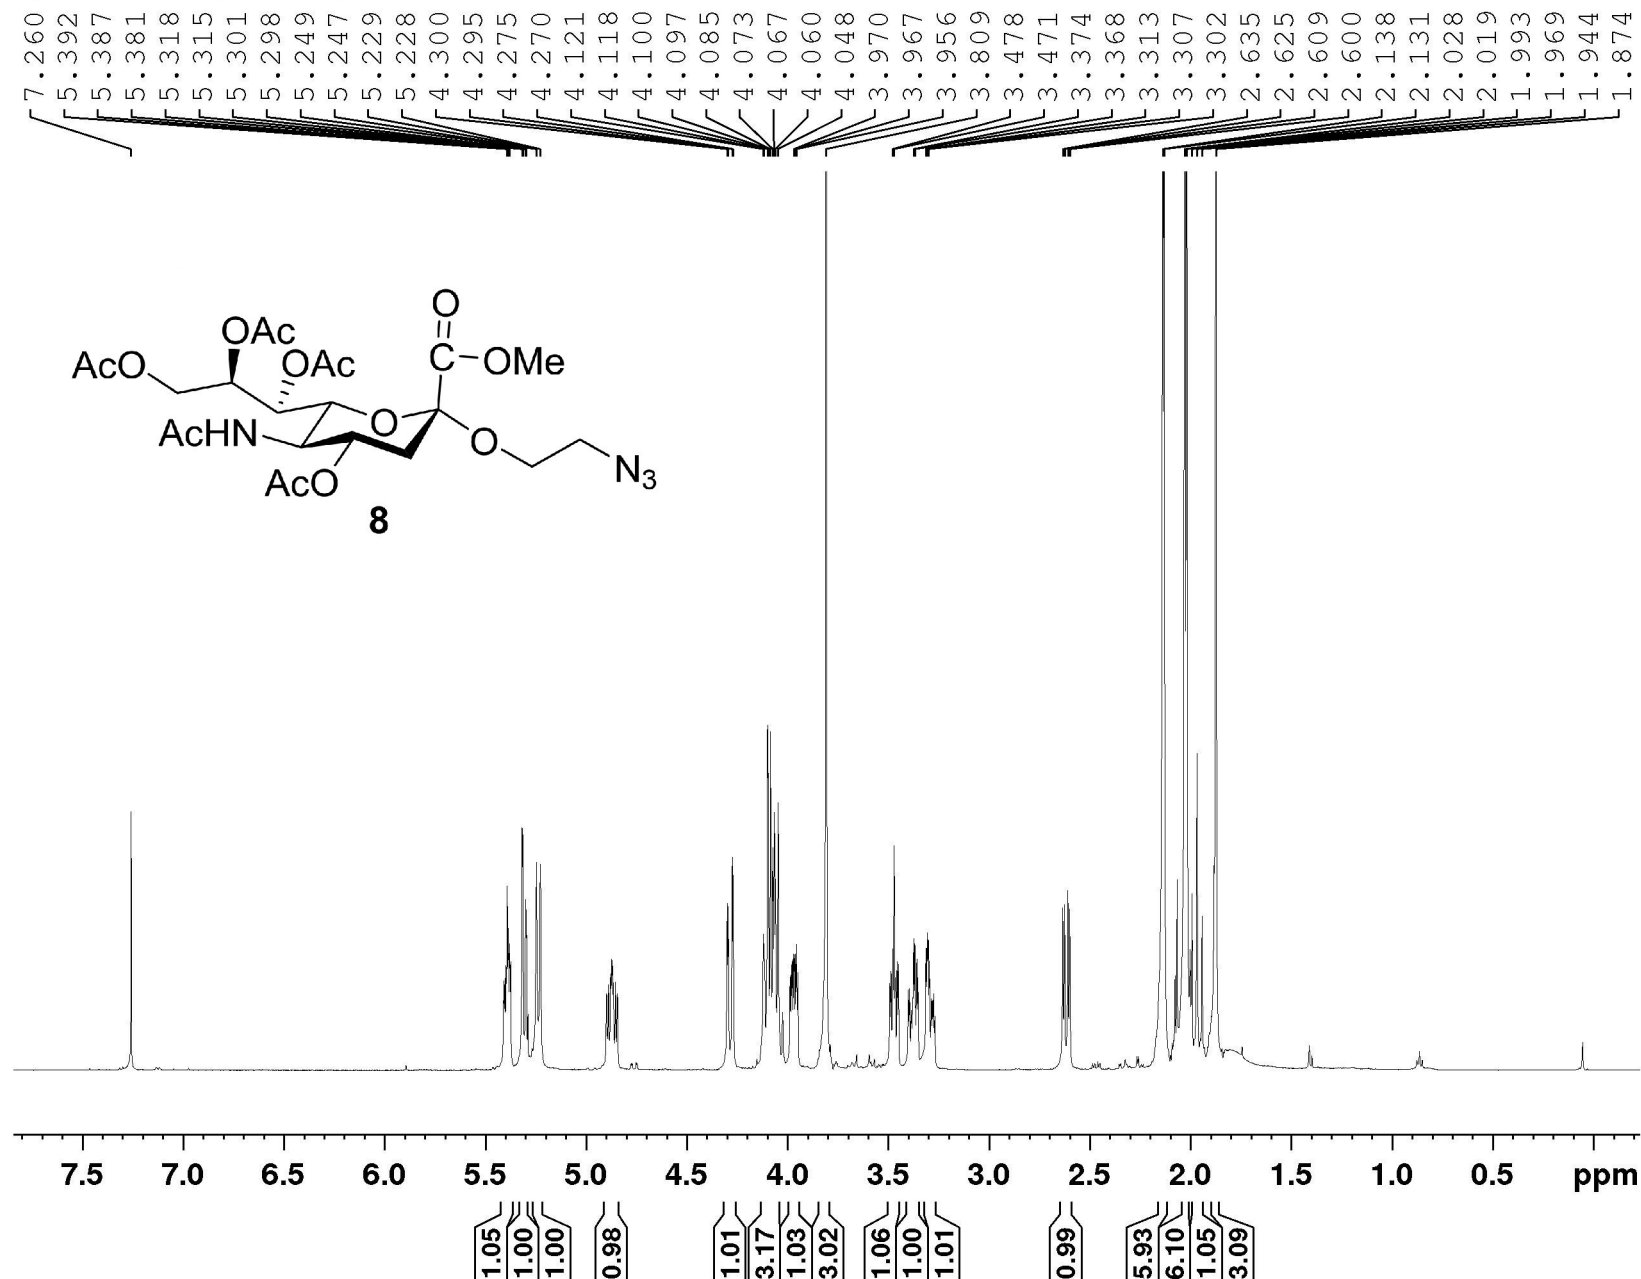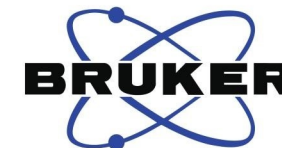

Current Data Parameters  
NAME BM-RD-031  
EXPNO 110  
PROCNO 1

F2 - Acquisition Parameters  
Date\_ 20210727  
Time 15.27  
INSTRUM Bruker\_default\_av500  
PROBHD 5 mm PABBO BB/  
PULPROG zg30  
TD 32768  
SOLVENT CDCl<sub>3</sub>  
NS 32  
DS 2  
SWH 10000.000 Hz  
FIDRES 0.305176 Hz  
AQ 1.6384000 sec  
RG 8  
DW 50.000 usec  
DE 6.50 usec  
TE -2232.8 K  
D1 1.00000000 sec  
TD0 1

===== CHANNEL f1 =====  
SFO1 500.4530898 MHz  
NUC1 1H  
P1 30.00 usec  
PLW1 10.00000000 W

F2 - Processing parameters  
SI 16384  
SF 500.4500113 MHz  
WDW EM  
SSB 0  
LB 0.30 Hz  
GB 0  
PC 1.00

GROUP BM  
BM-RD-031 in CDCl<sub>3</sub>

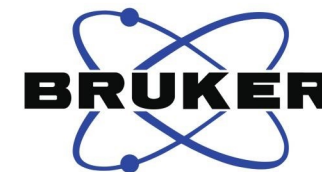

Current Data Parameters  
NAME BM-RD-031  
EXPNO 111  
PROCNO 1

F2 - Acquisition Parameters  
Date\_ 20210727  
Time 15.31  
INSTRUM Bruker\_default\_av500  
PROBHD 5 mm PABBO BB/  
PULPROG zgpg30  
TD 65536  
SOLVENT CDCl<sub>3</sub>  
NS 105  
DS 2  
SWH 37878.789 Hz  
FIDRES 0.577984 Hz  
AQ 0.8650752 sec  
RG 8  
DW 13.200 usec  
DE 6.50 usec  
TE -2192.1 K  
D1 2.00000000 sec  
D11 0.03000000 sec  
TD0 1

===== CHANNEL f1 =====  
SF01 125.8508346 MHz  
NUC1 13C  
P1 11.50 usec  
PLW1 66.00000000 W

===== CHANNEL f2 =====  
SF02 500.4520014 MHz  
NUC2 1H  
CPDPRG[2] waltz16  
PCPD2 137.00 usec  
PLW2 10.00000000 W  
PLW12 0.47852001 W  
PLW13 0.24043630 W

F2 - Processing parameters  
SI 32768  
SF 125.8382578 MHz  
WDW EM  
SSB 0  
LB 1.00 Hz  
GB 0  
PC 1.35

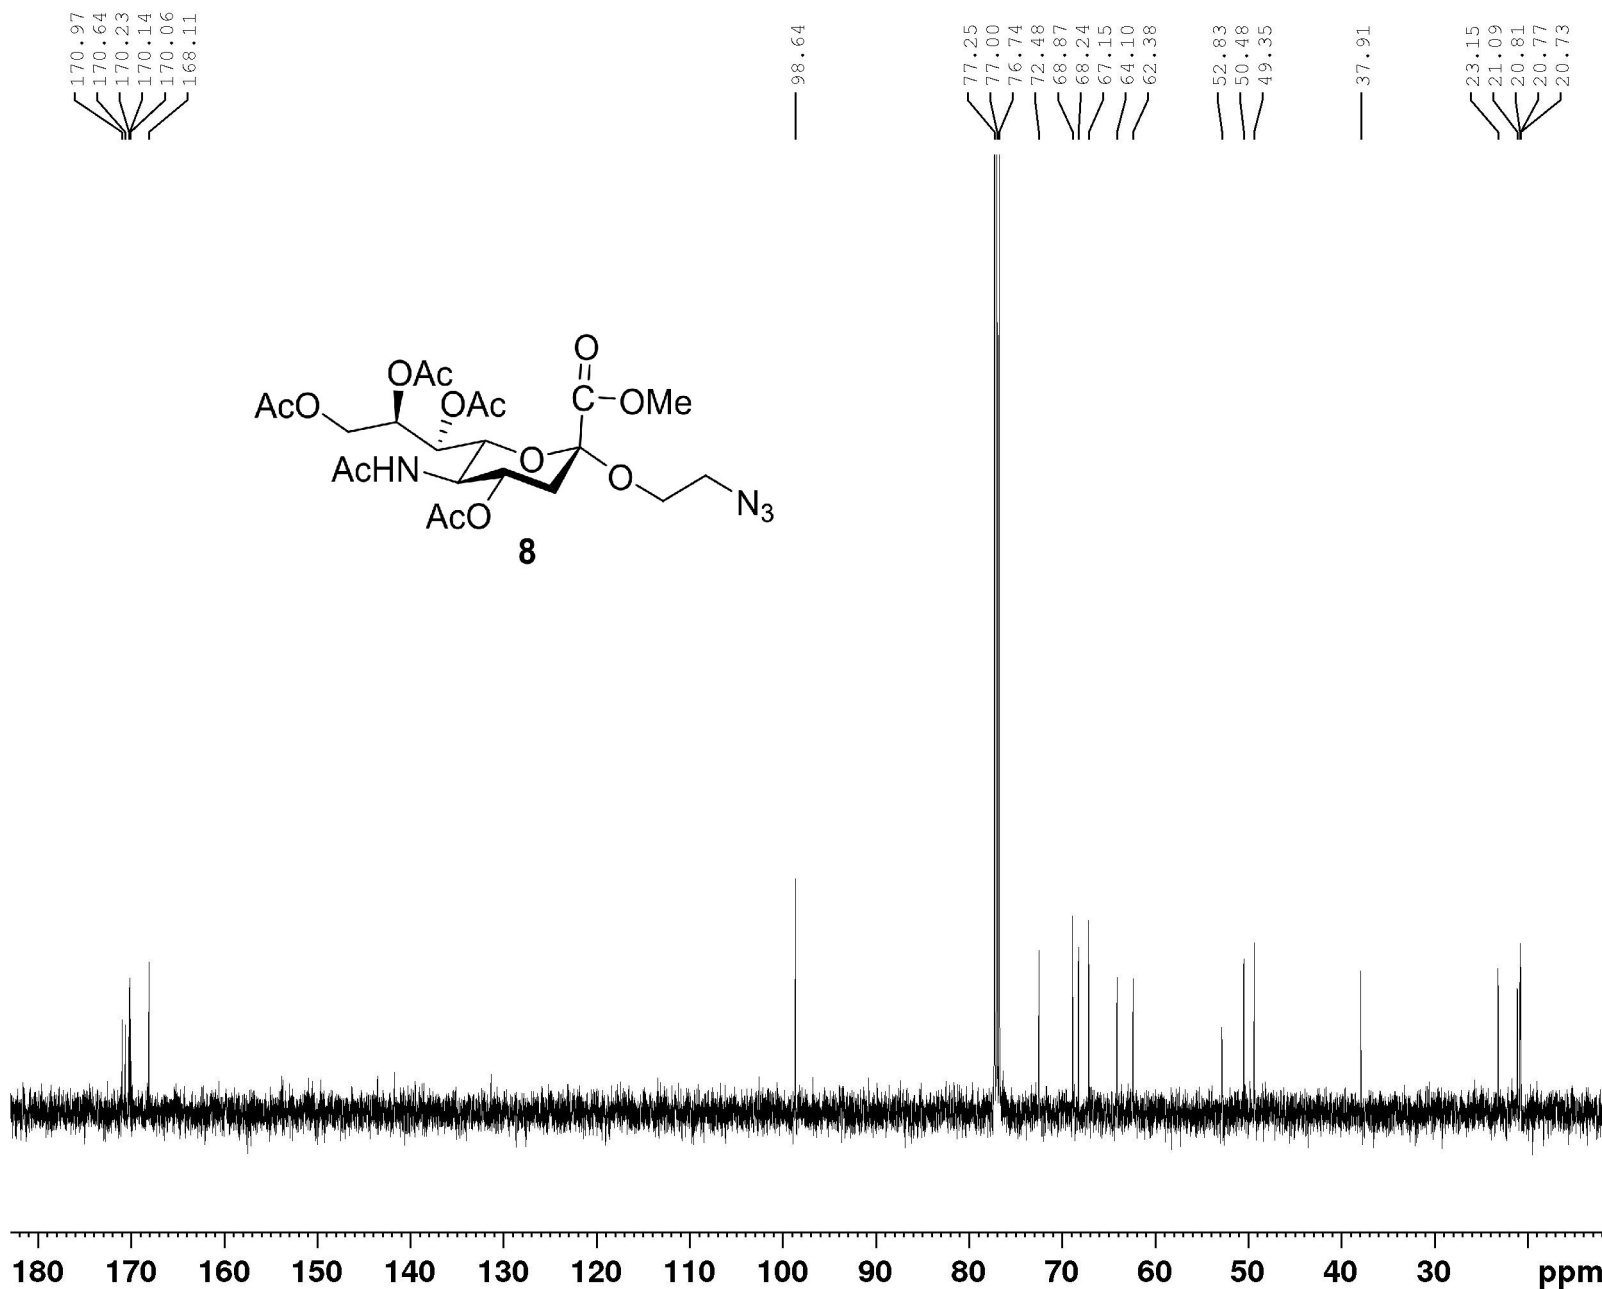

GROUP BM  
BM-RD-132upper in MEOD

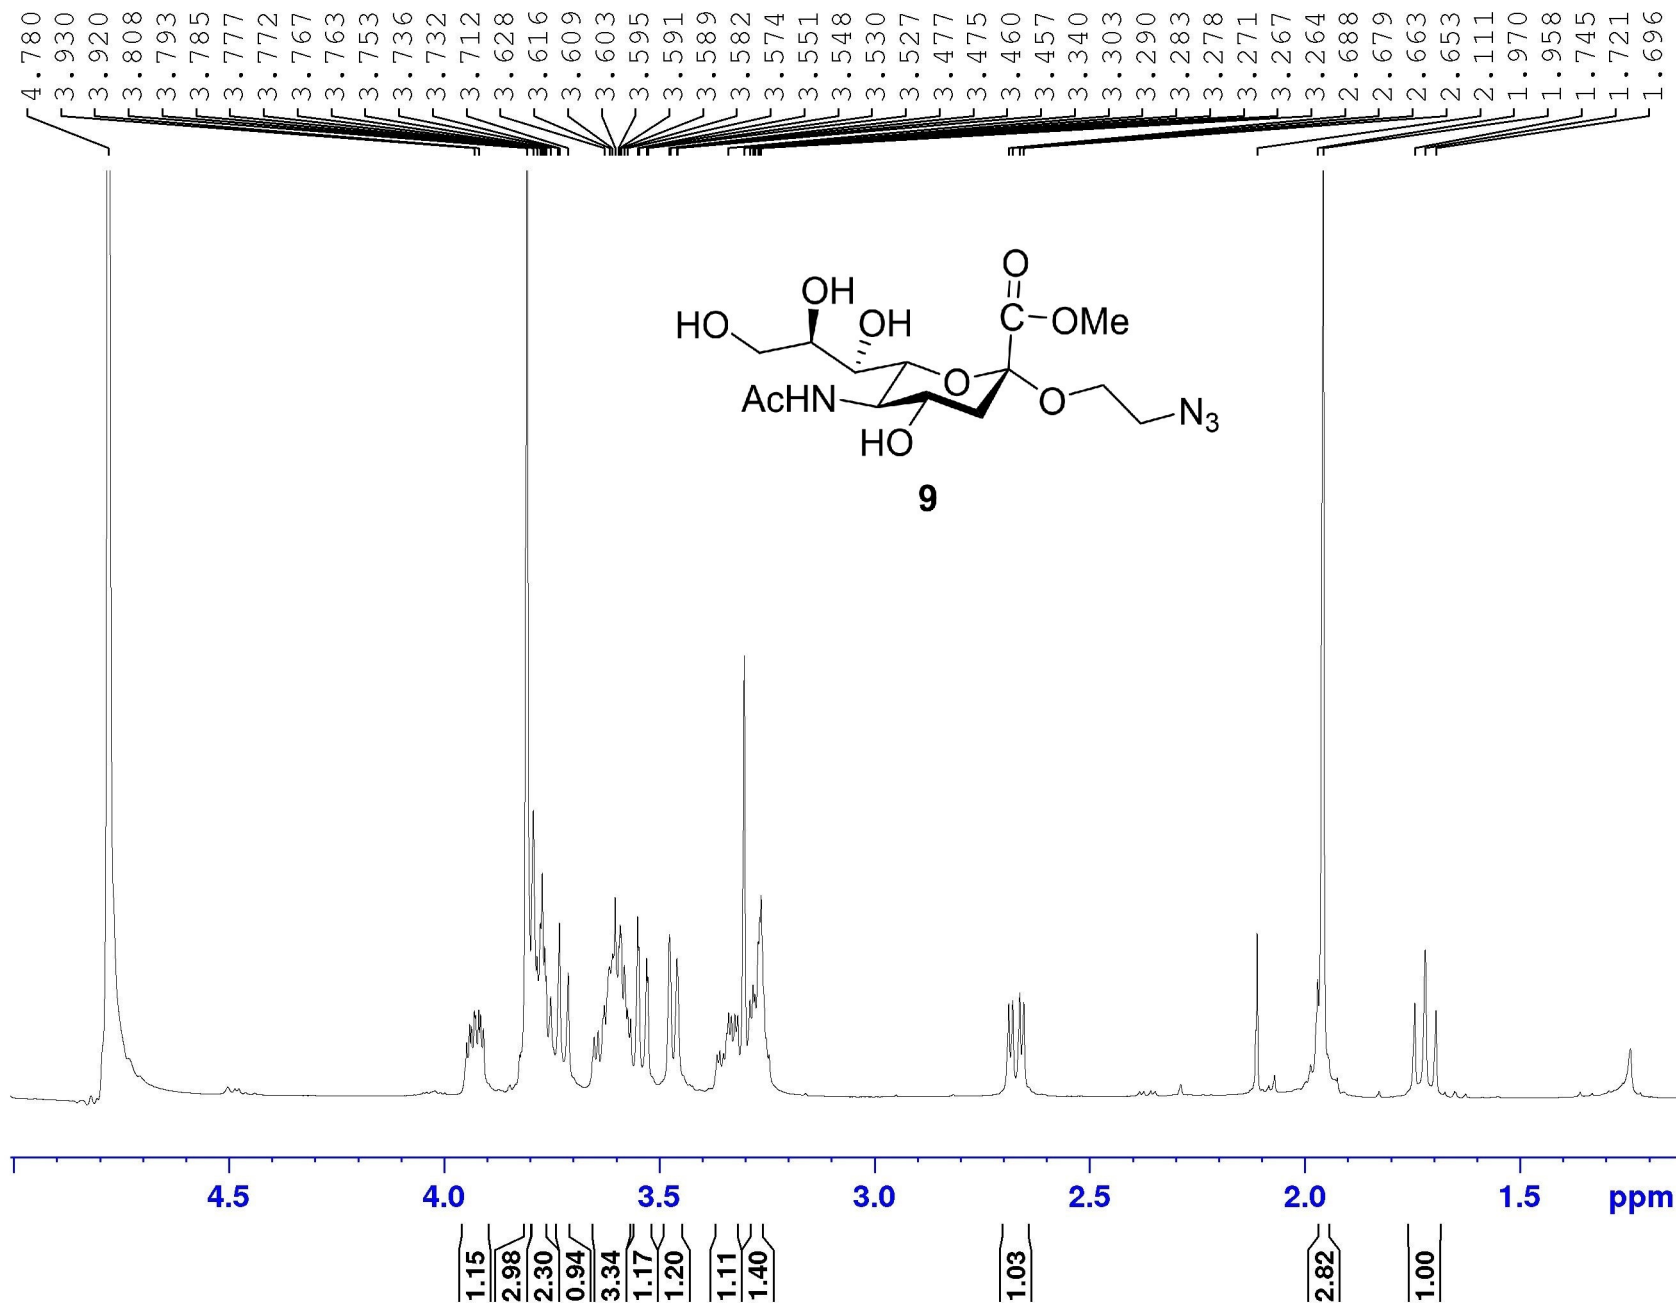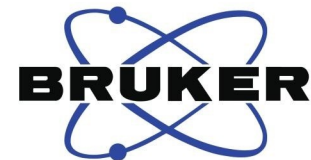

Current data parameters  
NAME BM-RD-132upper  
EXPNO 80  
PROCNO 1

F2 - Acquisition Parameters  
Date\_ 20190226  
Time 12.40  
INSTRUM Bruker\_default\_av500  
PROBHD 5 mm PABBO BB/  
PULPROG zg30  
TD 66560  
SOLVENT MeOD  
NS 16  
DS 2  
SWH 9469.697 Hz  
FIDRES 0.142273 Hz  
AQ 3.5143681 sec  
RG 90.5  
DW 52.800 usec  
DE 6.50 usec  
TE 300.8 K  
D1 1.00000000 sec  
TD0 1

----- CHANNEL f1 -----  
SFO1 500.3445031 MHz  
NUC1 1H  
P1 17.50 usec  
PLW1 10.00000000 W

F2 - Processing parameters  
SI 131072  
SF 500.3400324 MHz  
WDW EM  
SSB 0  
LB 0.60 Hz  
GB 0  
PC 1.00

GROUP BM  
BM-RD-132upper in MeOD

173.76  
169.26

98.74

73.59  
70.92  
68.73  
67.02  
63.29  
63.00  
52.33  
51.99  
50.28  
48.40  
48.07  
47.90  
47.73  
47.56  
47.38  
47.21  
47.04  
40.10

21.23

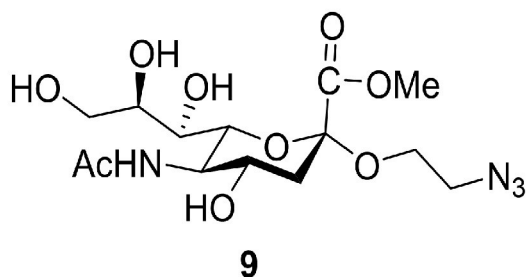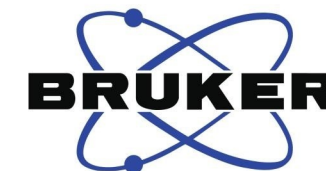

Current Data Parameters  
NAME BM-RD-132upper  
EXPNO 81  
PROCNO 1

F2 - Acquisition Parameters  
Date\_ 20190226  
Time 12.45  
INSTRUM Bruker\_default\_av500  
PROBHD 5 mm PABBO BB/  
PULPROG zgpg30  
TD 65536  
SOLVENT MeOD  
NS 98  
DS 4  
SWH 43859.648 Hz  
FIDRES 0.669245 Hz  
AQ 0.7471104 sec  
RG 203  
DW 11.400 usec  
DE 6.50 usec  
TE 301.6 K  
D1 2.00000000 sec  
D11 0.03000000 sec  
TD0 1

===== CHANNEL f1 =====  
SFO1 125.8294646 MHz  
NUC1 13C  
P1 11.50 usec  
PLW1 66.00000000 W

===== CHANNEL f2 =====  
SFO2 500.3420014 MHz  
NUC2 1H  
CPDPRG[2] waltz16  
PCPD2 80.00 usec  
PLW2 10.00000000 W  
PLW12 0.47852001 W  
PLW13 0.24068999 W

F2 - Processing parameters  
SI 32768  
SF 125.8106005 MHz  
WDW EM  
SSB 0  
LB 1.00 Hz  
GB 0  
PC 1.40

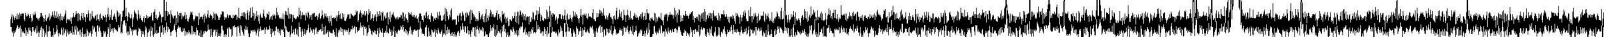

180 170 160 150 140 130 120 110 100 90 80 70 60 50 40 30 20 ppm



BM-RD-011 in DMSO-d6

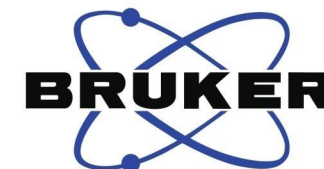

Current Data Parameters  
NAME BM-RD-011  
EXPNO 170  
PROCNO 1

F2 - Acquisition Parameters  
Date\_ 20150420  
Time 16.35  
INSTRUM spect  
PROBHD 5 mm PABBO BB-  
PULPROG zg30  
TD 65536  
SOLVENT DMSO  
NS 16  
DS 2  
SWH 10330.578 Hz  
FIDRES 0.157632 Hz  
AQ 3.1719425 sec  
RG 144  
DW 48.400 usec  
DE 6.50 usec  
TE 1078.2 K  
D1 1.00000000 sec  
TD0 1

===== CHANNEL f1 =====  
NUC1 1H  
P1 14.25 usec  
PL1 1.30 dB  
PL1W 15.30635643 W  
SFO1 500.2330891 MHz

F2 - Processing parameters  
SI 32768  
SF 500.2300000 MHz  
WDW EM  
SSB 0  
LB 0.30 Hz  
GB 0  
PC 1.00

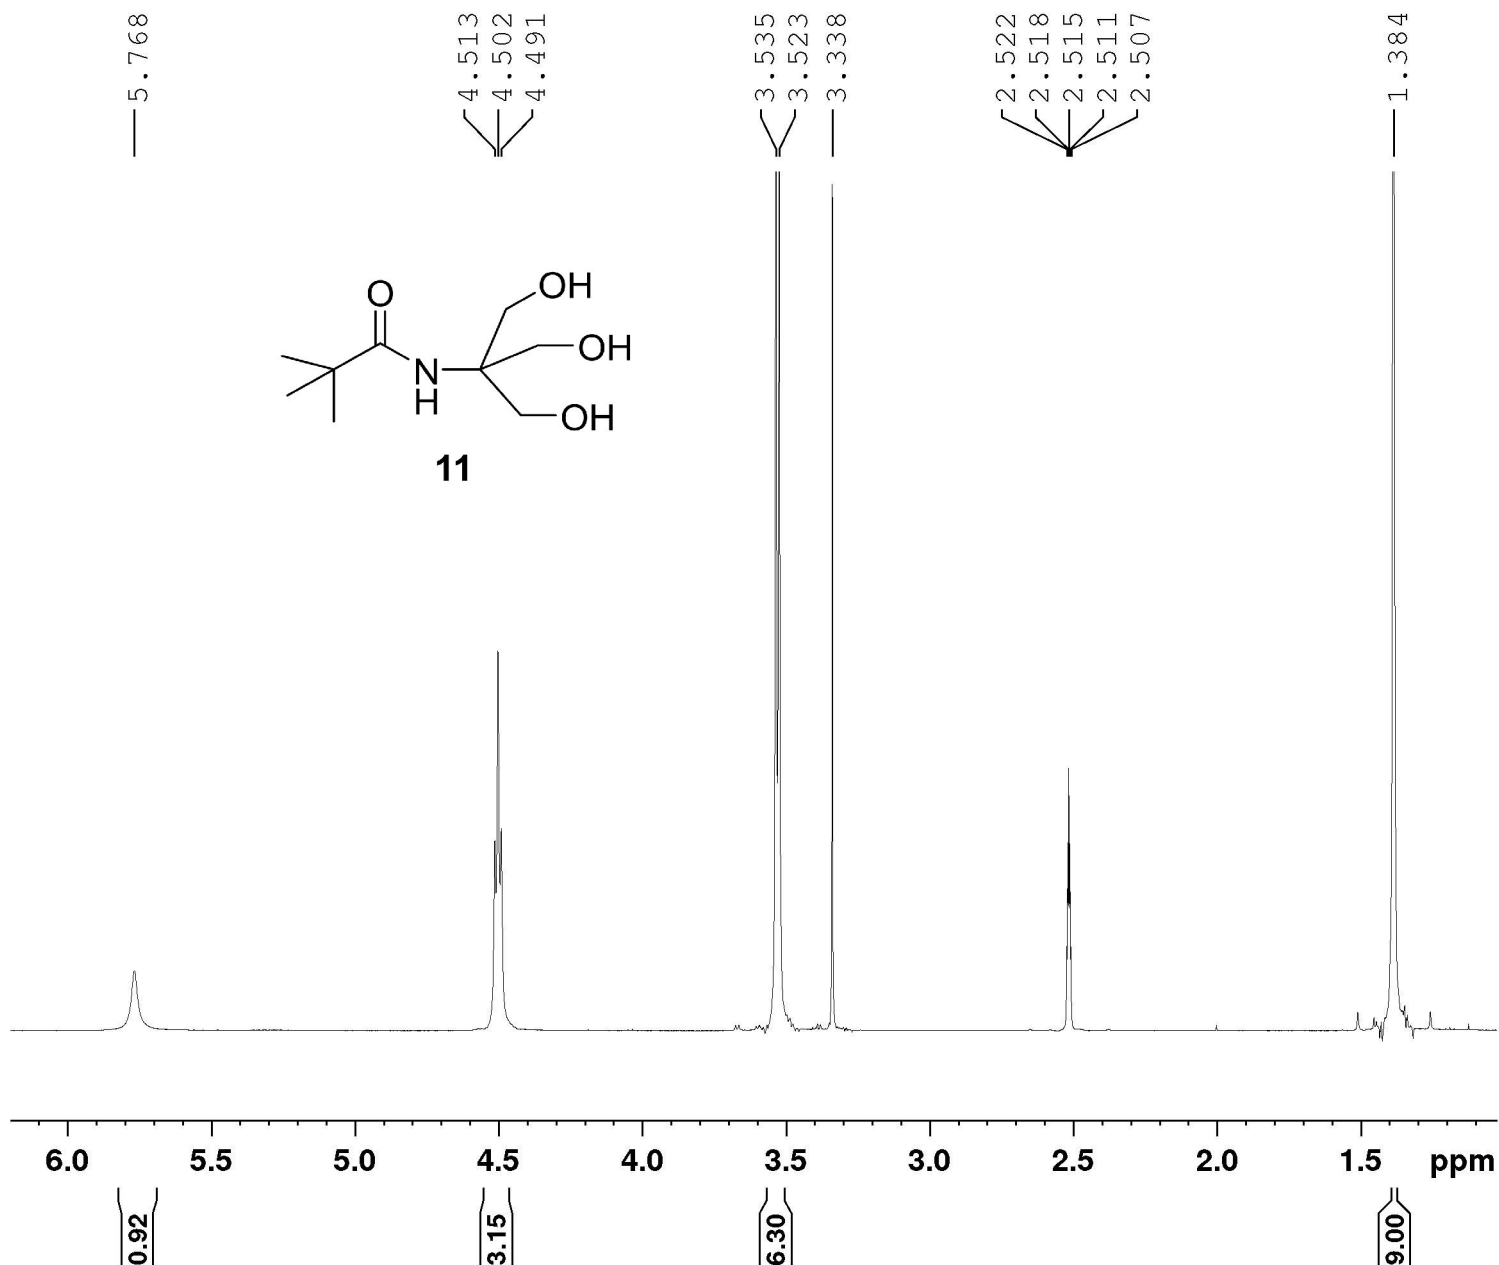

BM-RD-011 in DMSO-d6

155.50

78.30

60.92  
60.71

40.50  
40.33  
40.17  
40.00  
39.83  
39.67  
39.50

28.69

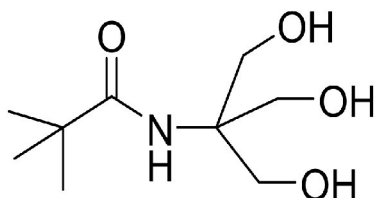

11

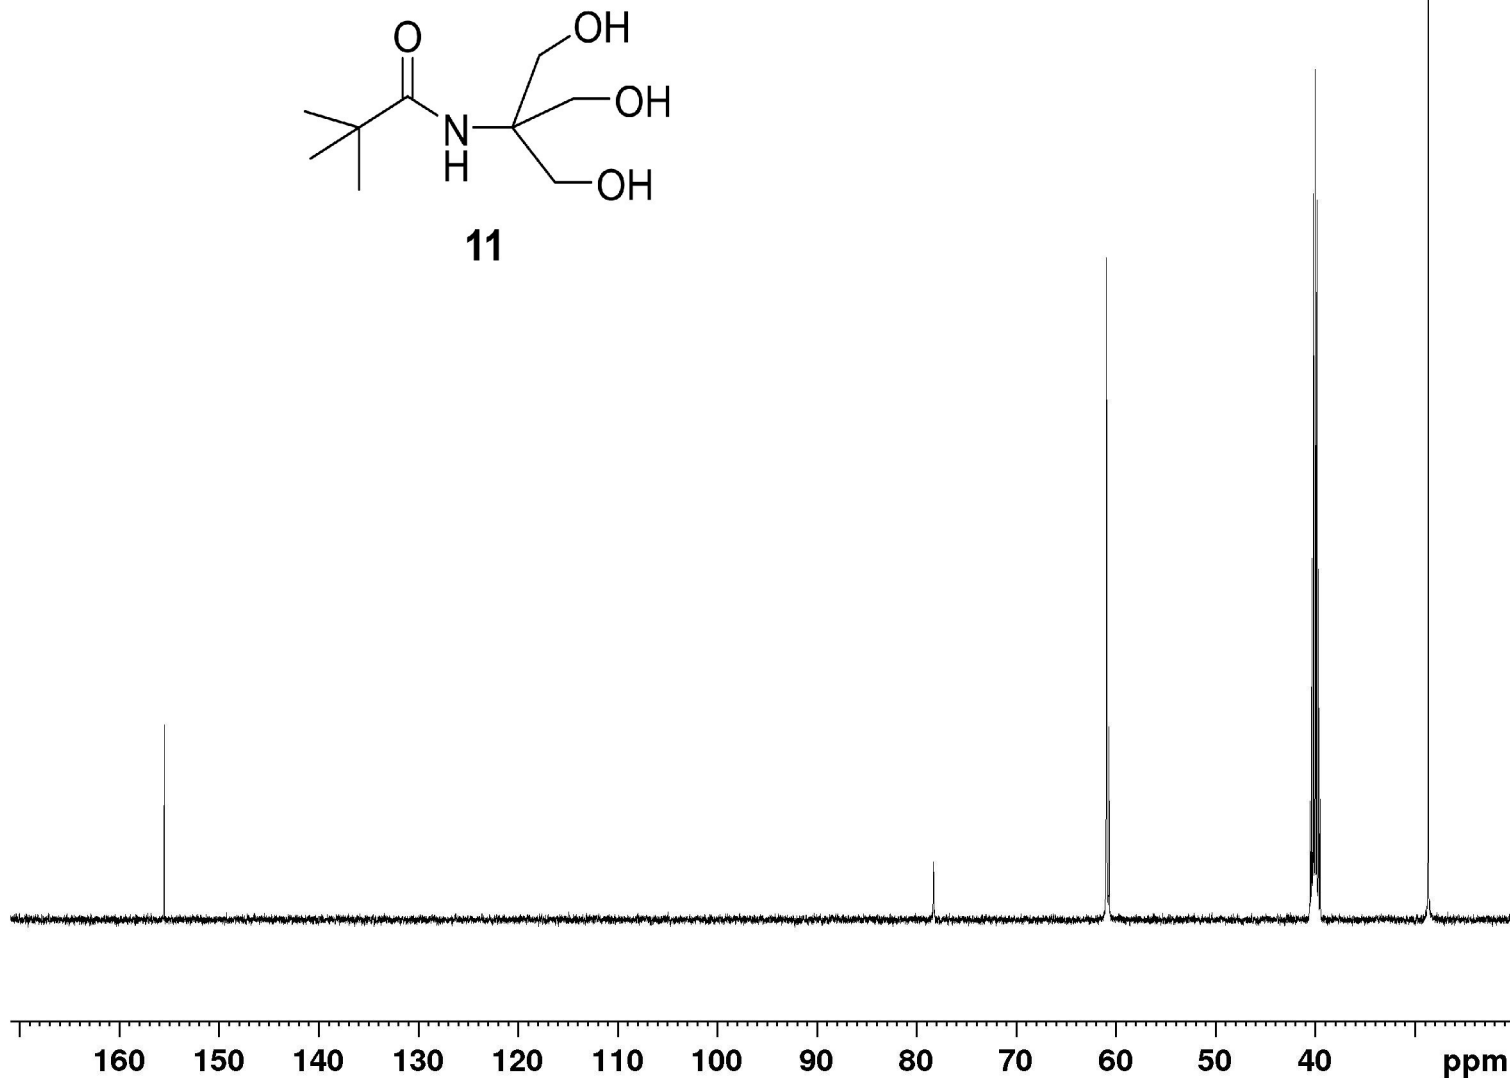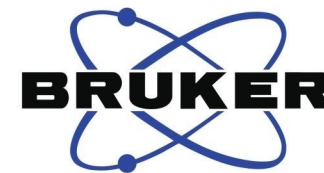

Current Data Parameters  
NAME BM-RD-011  
EXPNO 171  
PROCNO 1

F2 - Acquisition Parameters  
Date\_ 20150420  
Time 16.39  
INSTRUM spect  
PROBHD 5 mm PABBO BB-  
PULPROG zgdc  
TD 65536  
SOLVENT DMSO  
NS 653  
DS 4  
SWH 29761.904 Hz  
FIDRES 0.454131 Hz  
AQ 1.1010048 sec  
RG 203  
DW 16.800 usec  
DE 6.50 usec  
TE 1079.3 K  
D1 2.00000000 sec  
D11 0.03000000 sec  
TD0 1

===== CHANNEL f1 =====  
NUC1 13C  
P1 9.50 usec  
PL1 -0.50 dB  
PL1W 90.18825531 W  
SFO1 125.7955118 MHz

===== CHANNEL f2 =====  
CPDPRG[2] waltz16  
NUC2 1H  
PCPD2 80.00 usec  
PL2 1.30 dB  
PL12 16.00 dB  
PL2W 15.30635643 W  
PL12W 0.51864696 W  
SFO2 500.2320009 MHz

F2 - Processing parameters  
SI 32768  
SF 125.7829340 MHz  
WDW EM  
SSB 0  
LB 1.00 Hz  
GB 0  
PC 1.40

BM-RD-018 in CDCl<sub>3</sub>

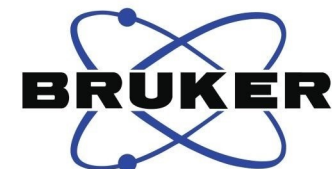

Current Data Parameters  
NAME BM-RD-018  
EXPNO 200  
PROCNO 1

F2 - Acquisition Parameters  
Date\_ 20150420  
Time 17.54  
INSTRUM spect  
PROBHD 5 mm PABBO BB-  
PULPROG zg30  
TD 65536  
SOLVENT CDCl<sub>3</sub>  
NS 16  
DS 2  
SWH 10330.578 Hz  
FIDRES 0.157632 Hz  
AQ 3.1719425 sec  
RG 101  
DW 48.400 usec  
DE 6.50 usec  
TE 1060.8 K  
D1 1.00000000 sec  
TD0 1

===== CHANNEL f1 =====  
NUC1 1H  
P1 14.25 usec  
PL1 1.30 dB  
PL1W 15.30635643 W  
SFO1 500.2330891 MHz

F2 - Processing parameters  
SI 32768  
SF 500.2300154 MHz  
WDW EM  
SSB 0  
LB 0.30 Hz  
GB 0  
PC 1.00

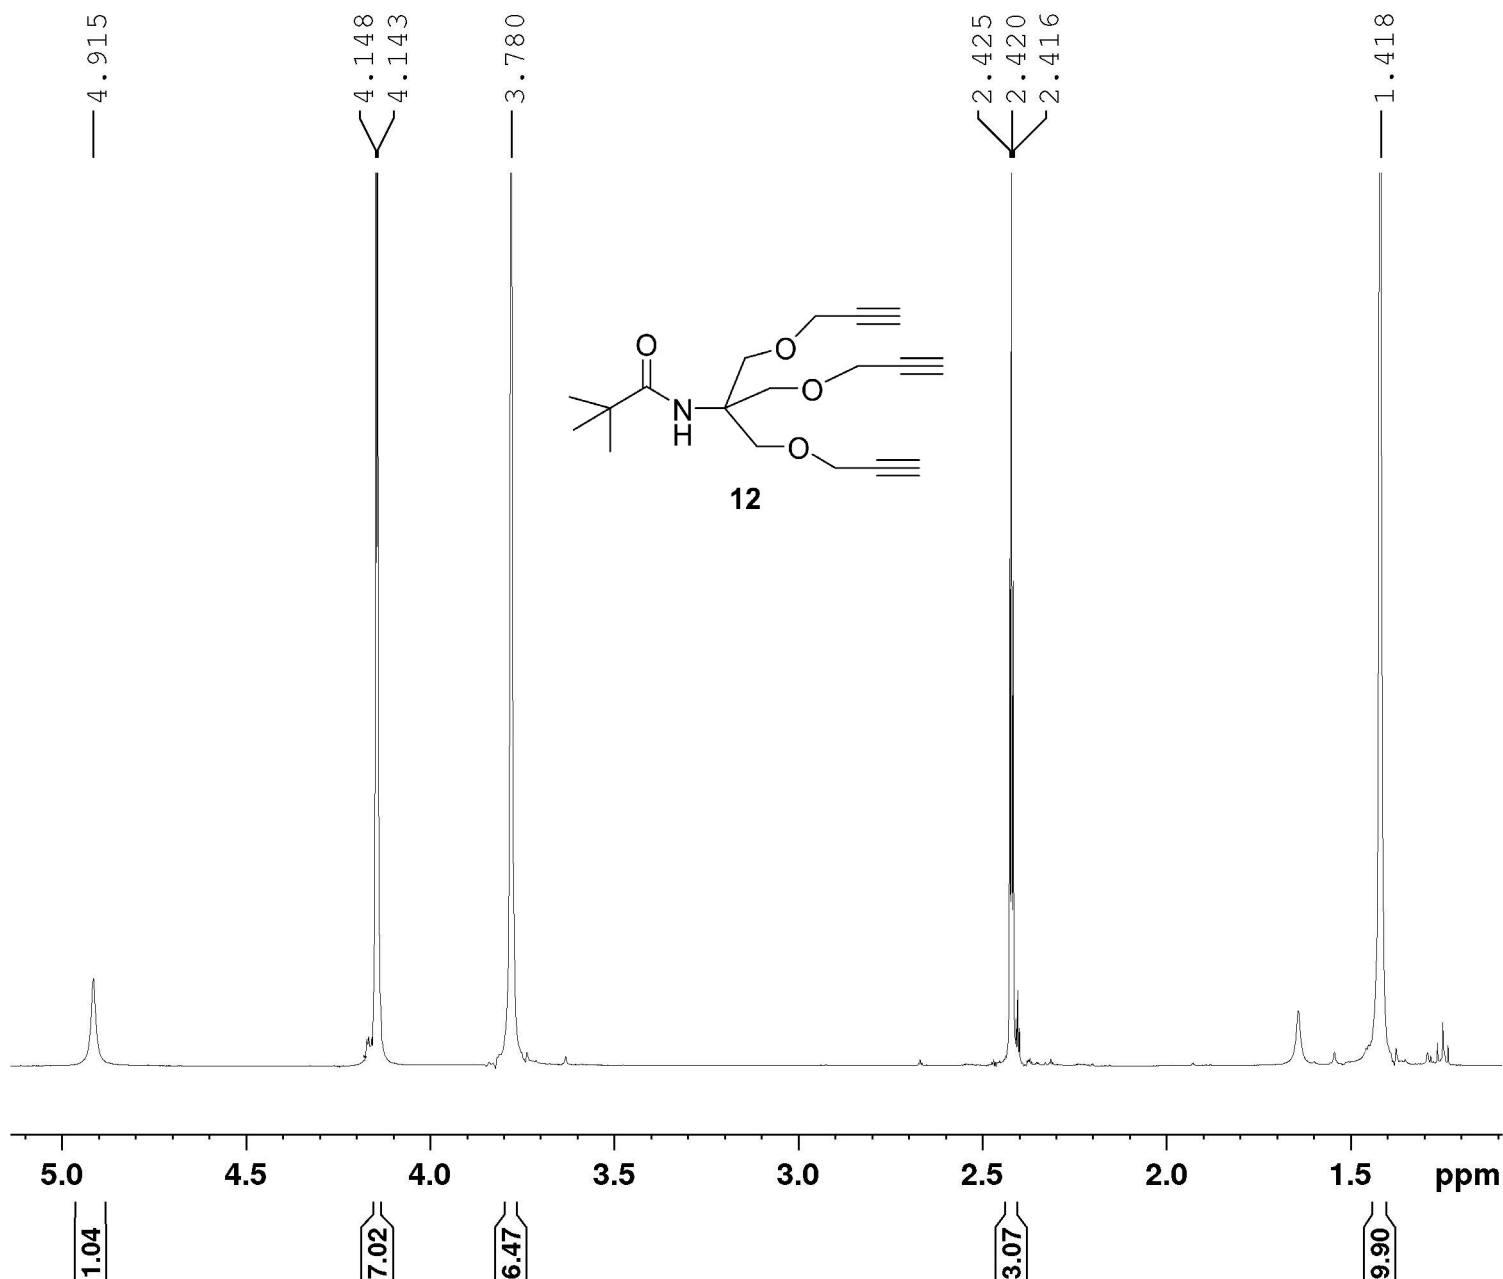

BM-RD-018 in CDCl<sub>3</sub>

154.73

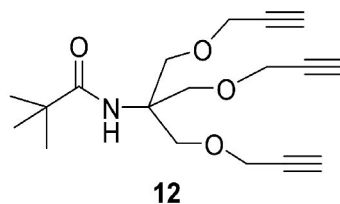

79.59  
77.25  
77.00  
76.74  
74.50  
68.91  
58.63  
58.06  
28.32

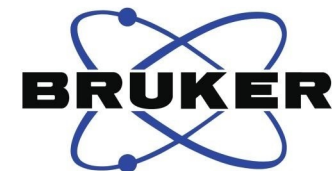

Current Data Parameters  
NAME BM-RD-018  
EXPNO 201  
PROCNO 1

F2 - Acquisition Parameters  
Date\_ 20150420  
Time 17.57  
INSTRUM spect  
PROBHD 5 mm PABBO BB-  
PULPROG zgdc  
TD 65536  
SOLVENT CDCl<sub>3</sub>  
NS 215  
DS 4  
SWH 29761.904 Hz  
FIDRES 0.454131 Hz  
AQ 1.1010048 sec  
RG 203  
DW 16.800 usec  
DE 6.50 usec  
TE 1057.5 K  
D1 2.00000000 sec  
D11 0.03000000 sec  
TD0 1

===== CHANNEL f1 =====  
NUC1 13C  
P1 9.50 usec  
PL1 -0.50 dB  
PL1W 90.18825531 W  
SFO1 125.7955118 MHz

===== CHANNEL f2 =====  
CPDPRG[2] waltz16  
NUC2 1H  
PCPD2 80.00 usec  
PL2 1.30 dB  
PL12 16.00 dB  
PL2W 15.30635643 W  
PL12W 0.51864696 W  
SFO2 500.2320009 MHz

F2 - Processing parameters  
SI 32768  
SF 125.7829369 MHz  
WDW EM  
SSB 0  
LB 1.00 Hz  
GB 0  
PC 1.40

160 150 140 130 120 110 100 90 80 70 60 50 40 30 ppm

GROUP BM  
BM-RD-032 in CDCl<sub>3</sub>

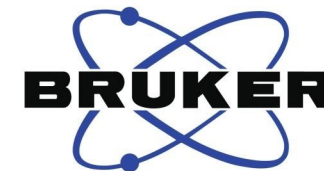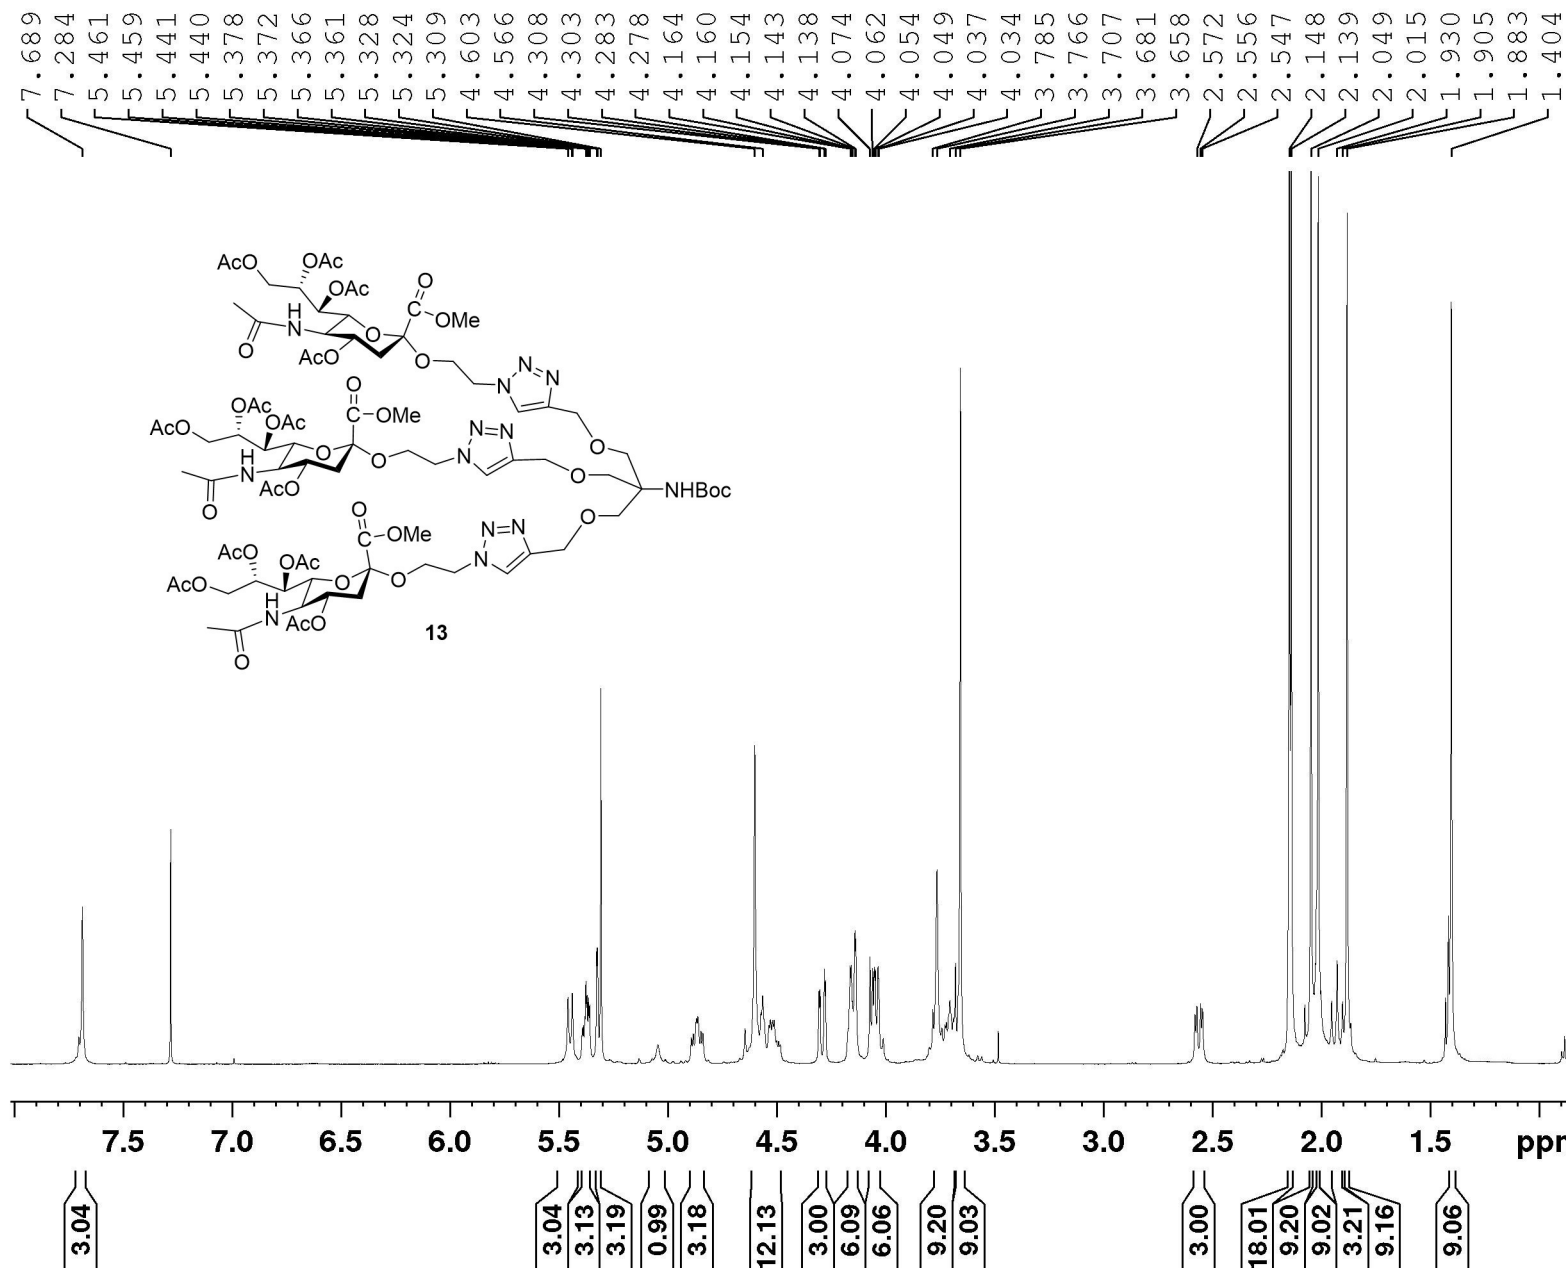

Current Data Parameters  
NAME BM-RD-032  
EXPNO 20  
PROCNO 1

F2 - Acquisition Parameters  
Date\_ 20210809  
Time 10.36 h  
INSTRUM AV4 500MHz  
PROBHD z119467\_0011 (  
PULPROG zg30  
TD 65536  
SOLVENT CDCl<sub>3</sub>  
NS 16  
DS 2  
SWH 10000.000 Hz  
FIDRES 0.305176 Hz  
AQ 3.2767999 sec  
RG 101  
DW 50.000 usec  
DE 10.11 usec  
TE 299.3 K  
D1 1.00000000 sec  
TD0 1  
SFO1 500.1430884 MHz  
NUC1 1H  
P0 4.67 usec  
P1 14.00 usec  
PLW1 13.47399998 W

F2 - Processing parameters  
SI 65536  
SF 500.1400000 MHz  
WDW EM  
SSB 0  
LB 0.30 Hz  
GB 0  
PC 1.00

GROUP BM  
BM-RD-032 in CDCl<sub>3</sub>

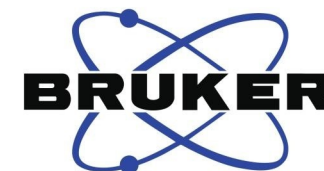

Current Data Parameters  
NAME BM-RD-032  
EXPNO 230  
PROCNO 1

F2 - Acquisition Parameters  
Date\_ 20210809  
Time 14.10 h  
INSTRUM AV4 500MHz  
PROBHD Z119467\_0011 (  
PULPROG zgpg30  
TD 65536  
SOLVENT CDCl<sub>3</sub>  
NS 128  
DS 4  
SWH 30120.482 Hz  
FIDRES 0.919204 Hz  
AQ 1.0878977 sec  
RG 101  
DW 16.600 usec  
DE 6.50 usec  
TE 299.8 K  
D1 2.00000000 sec  
D11 0.03000000 sec  
TD0 1  
SFO1 125.7728791 MHz  
NUC1 13C  
P0 3.33 usec  
P1 10.00 usec  
PLW1 77.33000183 W  
SFO2 500.1420006 MHz  
NUC2 1H  
CPDPRG[2] waltz65  
PCPD2 80.00 usec  
PLW2 13.47399998 W  
PLW12 0.41264001 W  
PLW13 0.20756000 W

F2 - Processing parameters  
SI 32768  
SF 125.7603030 MHz  
WDW EM  
SSB 0  
LB 1.00 Hz  
GB 0  
PC 1.40

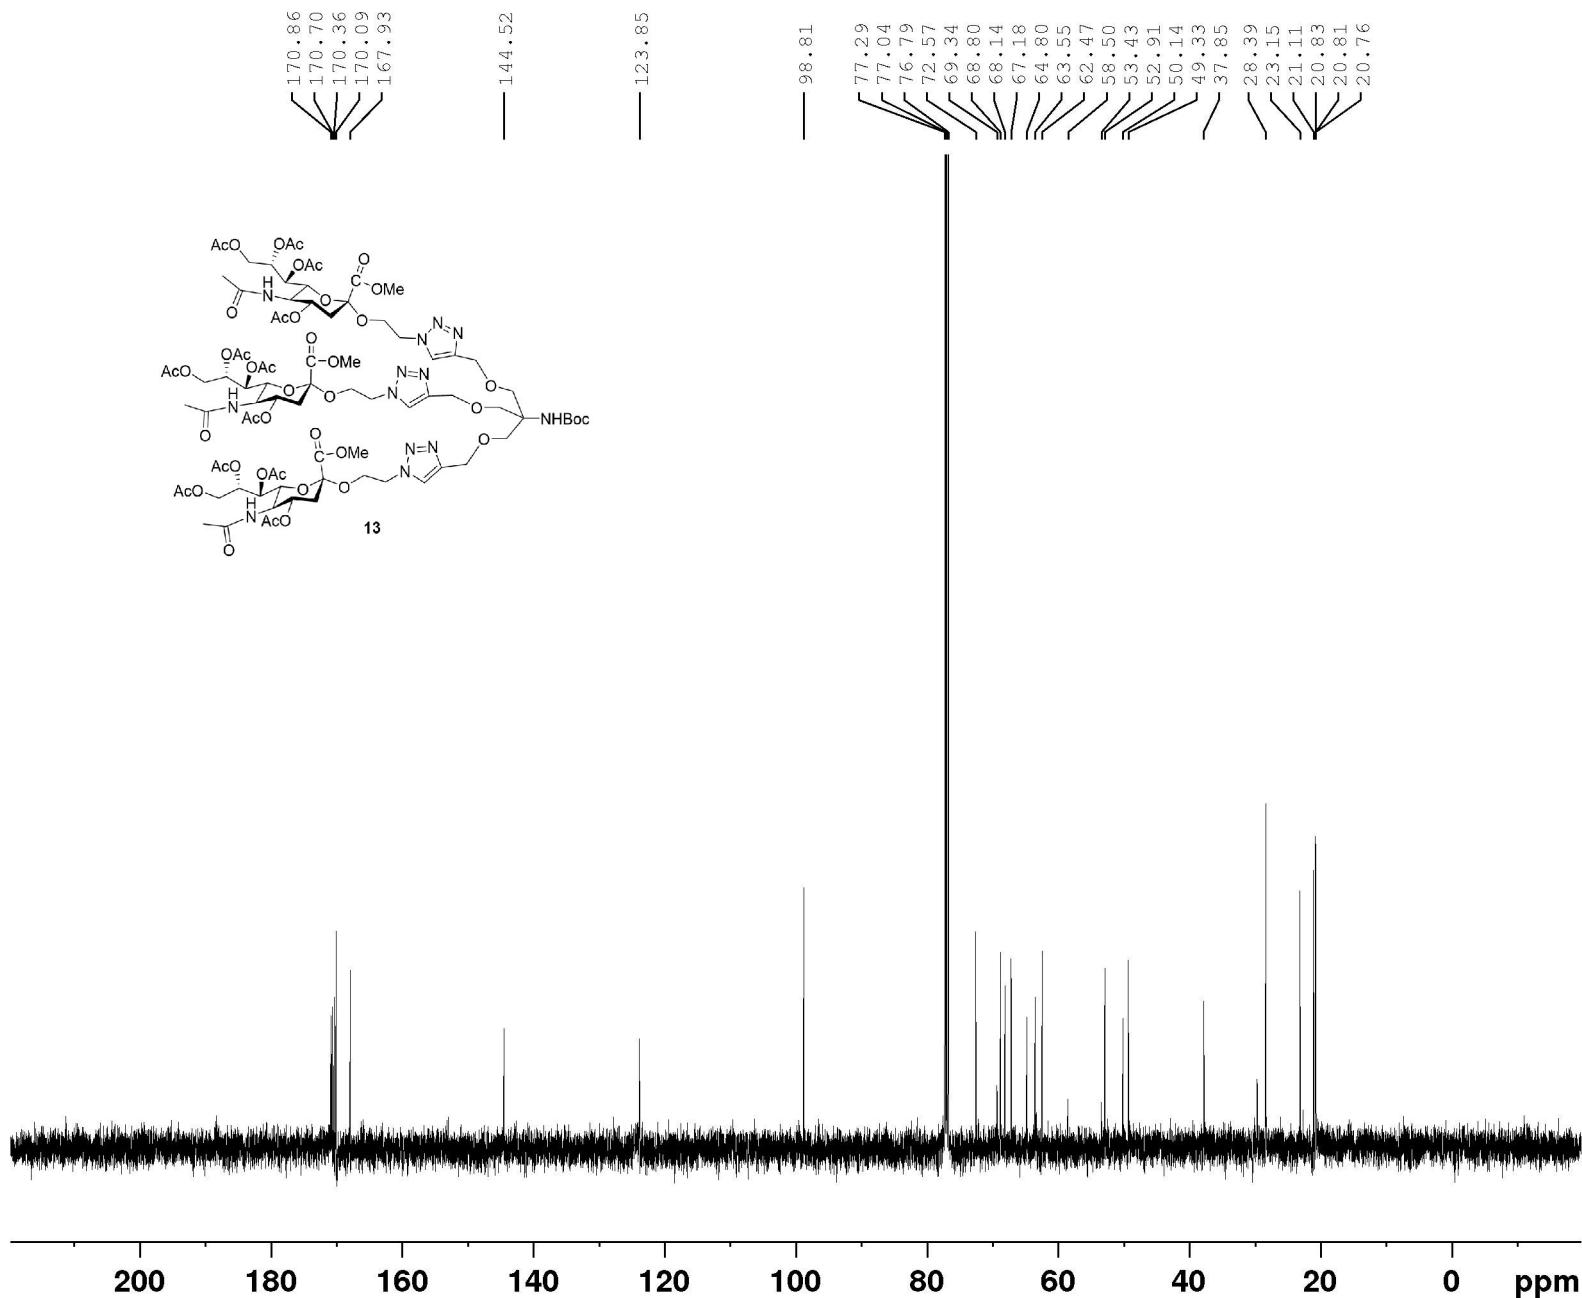

GROUP BM  
BM-RD-037 in CDCl<sub>3</sub>

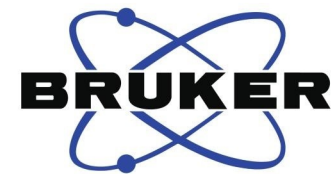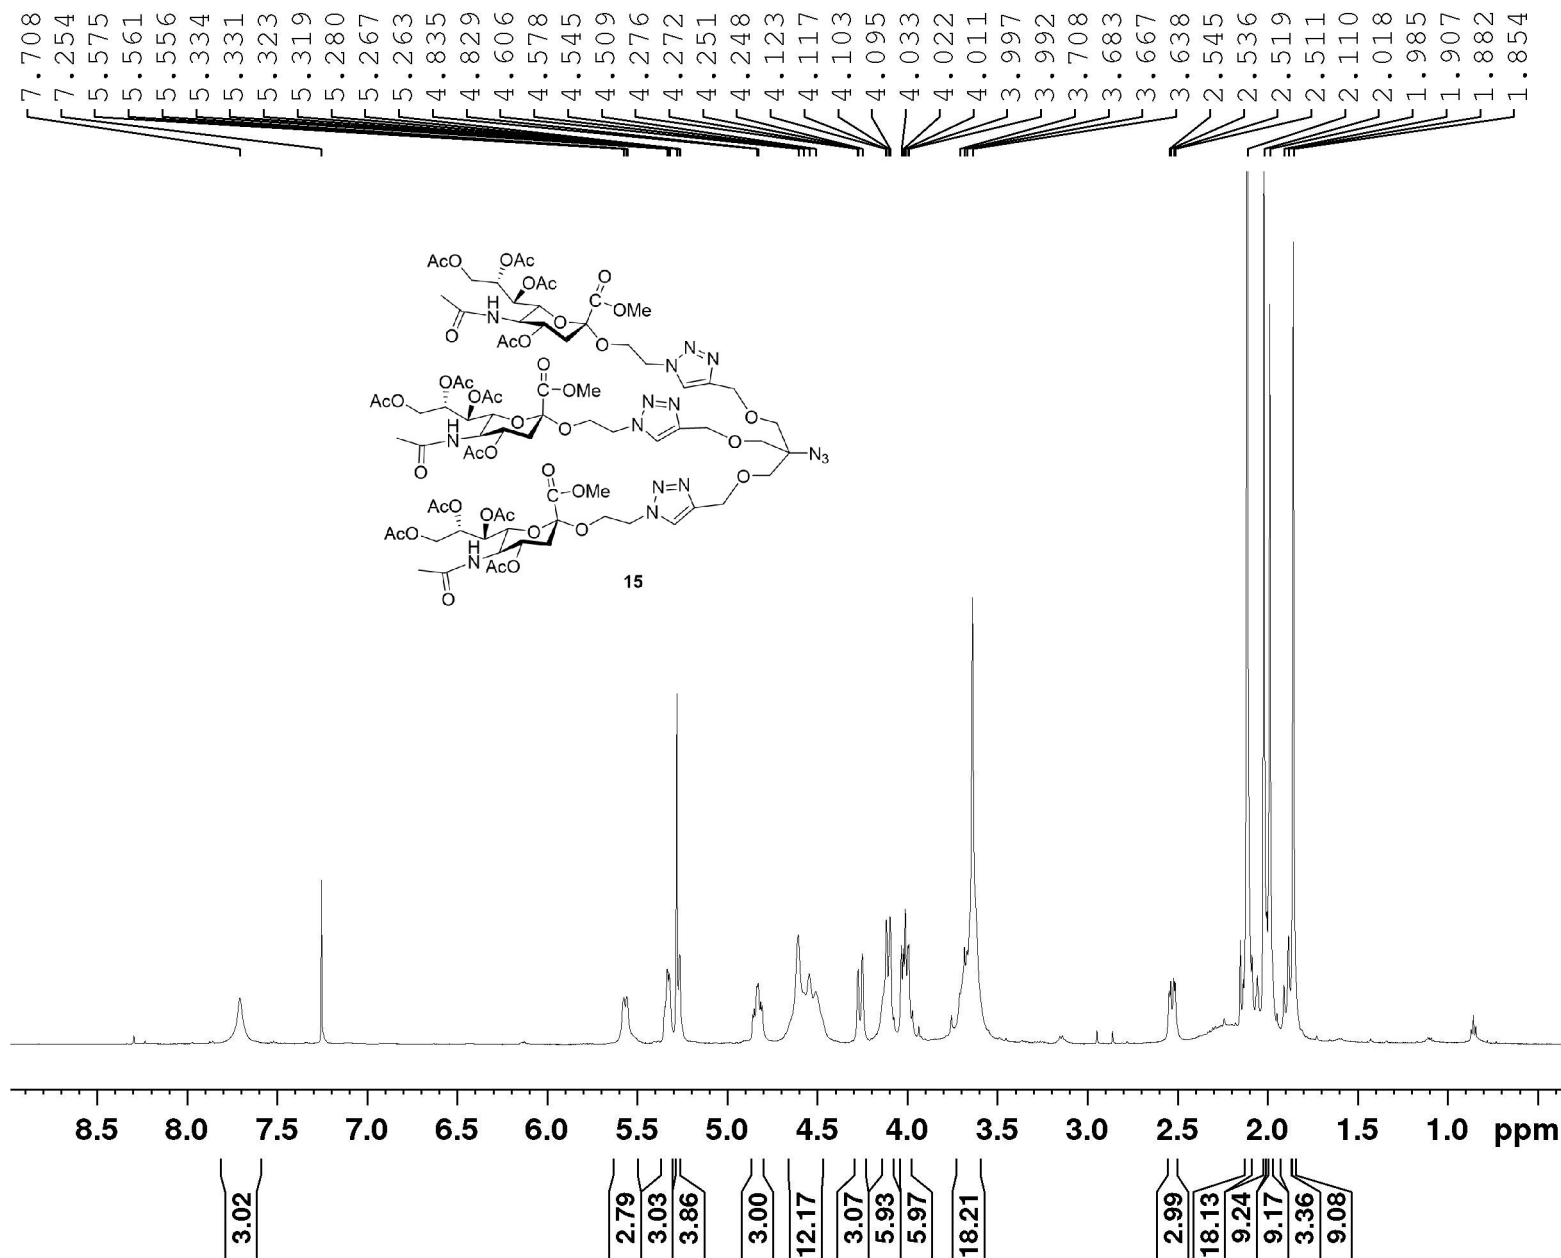

Current Data Parameters  
NAME BM-RD-037  
EXPNO 130  
PROCNO 1

F2 - Acquisition Parameters  
Date\_ 20211111  
Time 14.40  
INSTRUM Bruker\_default\_av500  
PROBHD 5 mm PABBO BB/  
PULPROG zg30  
TD 32768  
SOLVENT CDCl<sub>3</sub>  
NS 16  
DS 2  
SWH 10000.000 Hz  
FIDRES 0.305176 Hz  
AQ 1.6384000 sec  
RG 14.2  
DW 50.000 usec  
DE 6.50 usec  
TE 2307.2 K  
D1 1.00000000 sec  
TD0 1

===== CHANNEL f1 =====  
SFO1 500.4530898 MHz  
NUC1 1H  
P1 30.00 usec  
PLW1 10.00000000 W

F2 - Processing parameters  
SI 16384  
SF 500.4500151 MHz  
WDW EM  
SSB 0  
LB 0.30 Hz  
GB 0  
PC 10.10

GROUP BM  
BM-RD-037 in CDCl<sub>3</sub>

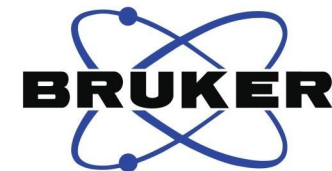

170.96  
170.81  
170.70  
170.24  
170.13  
167.85

143.46

122.99

98.77

77.25  
77.00  
76.74  
72.47  
70.07  
68.78  
68.14  
67.18  
62.44  
53.38  
52.92  
49.21

37.68

23.00  
21.02  
20.73  
20.68

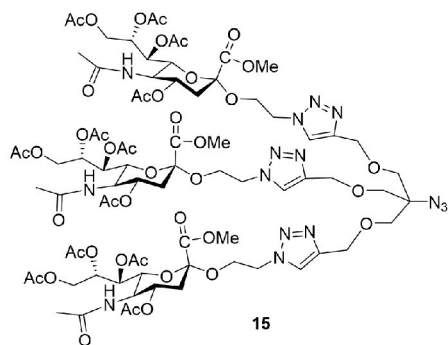

Current Data Parameters  
NAME BM-RD-037  
EXPNO 133  
PROCNO 1

F2 - Acquisition Parameters  
Date\_ 20211111  
Time 14.48  
INSTRUM Bruker\_default\_av500  
PROBHD 5 mm PABBO BB/  
PULPROG zgpg30  
TD 65536  
SOLVENT CDCl<sub>3</sub>  
NS 318  
DS 2  
SWH 37878.789 Hz  
FIDRES 0.577984 Hz  
AQ 0.8650752 sec  
RG 32  
DW 13.200 usec  
DE 6.50 usec  
TE 4345.2 K  
D1 2.00000000 sec  
D11 0.03000000 sec  
TD0 1

===== CHANNEL f1 =====  
SFO1 125.8508346 MHz  
NUC1 13C  
P1 11.50 usec  
PLW1 66.00000000 W

===== CHANNEL f2 =====  
SFO2 500.4520014 MHz  
NUC2 1H  
CPDPRG[2] waltz16  
PCPD2 137.00 usec  
PLW2 10.00000000 W  
PLW12 0.47852001 W  
PLW13 0.24043630 W

F2 - Processing parameters  
SI 32768  
SF 125.8382587 MHz  
WDW EM  
SSB 0  
LB 1.00 Hz  
GB 0  
PC 1.35

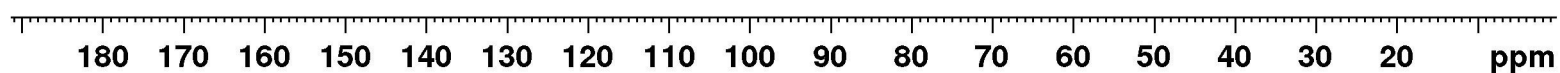



GROUP BM  
BM-RD-033 in CDCl<sub>3</sub>

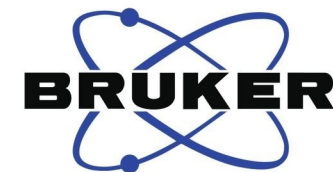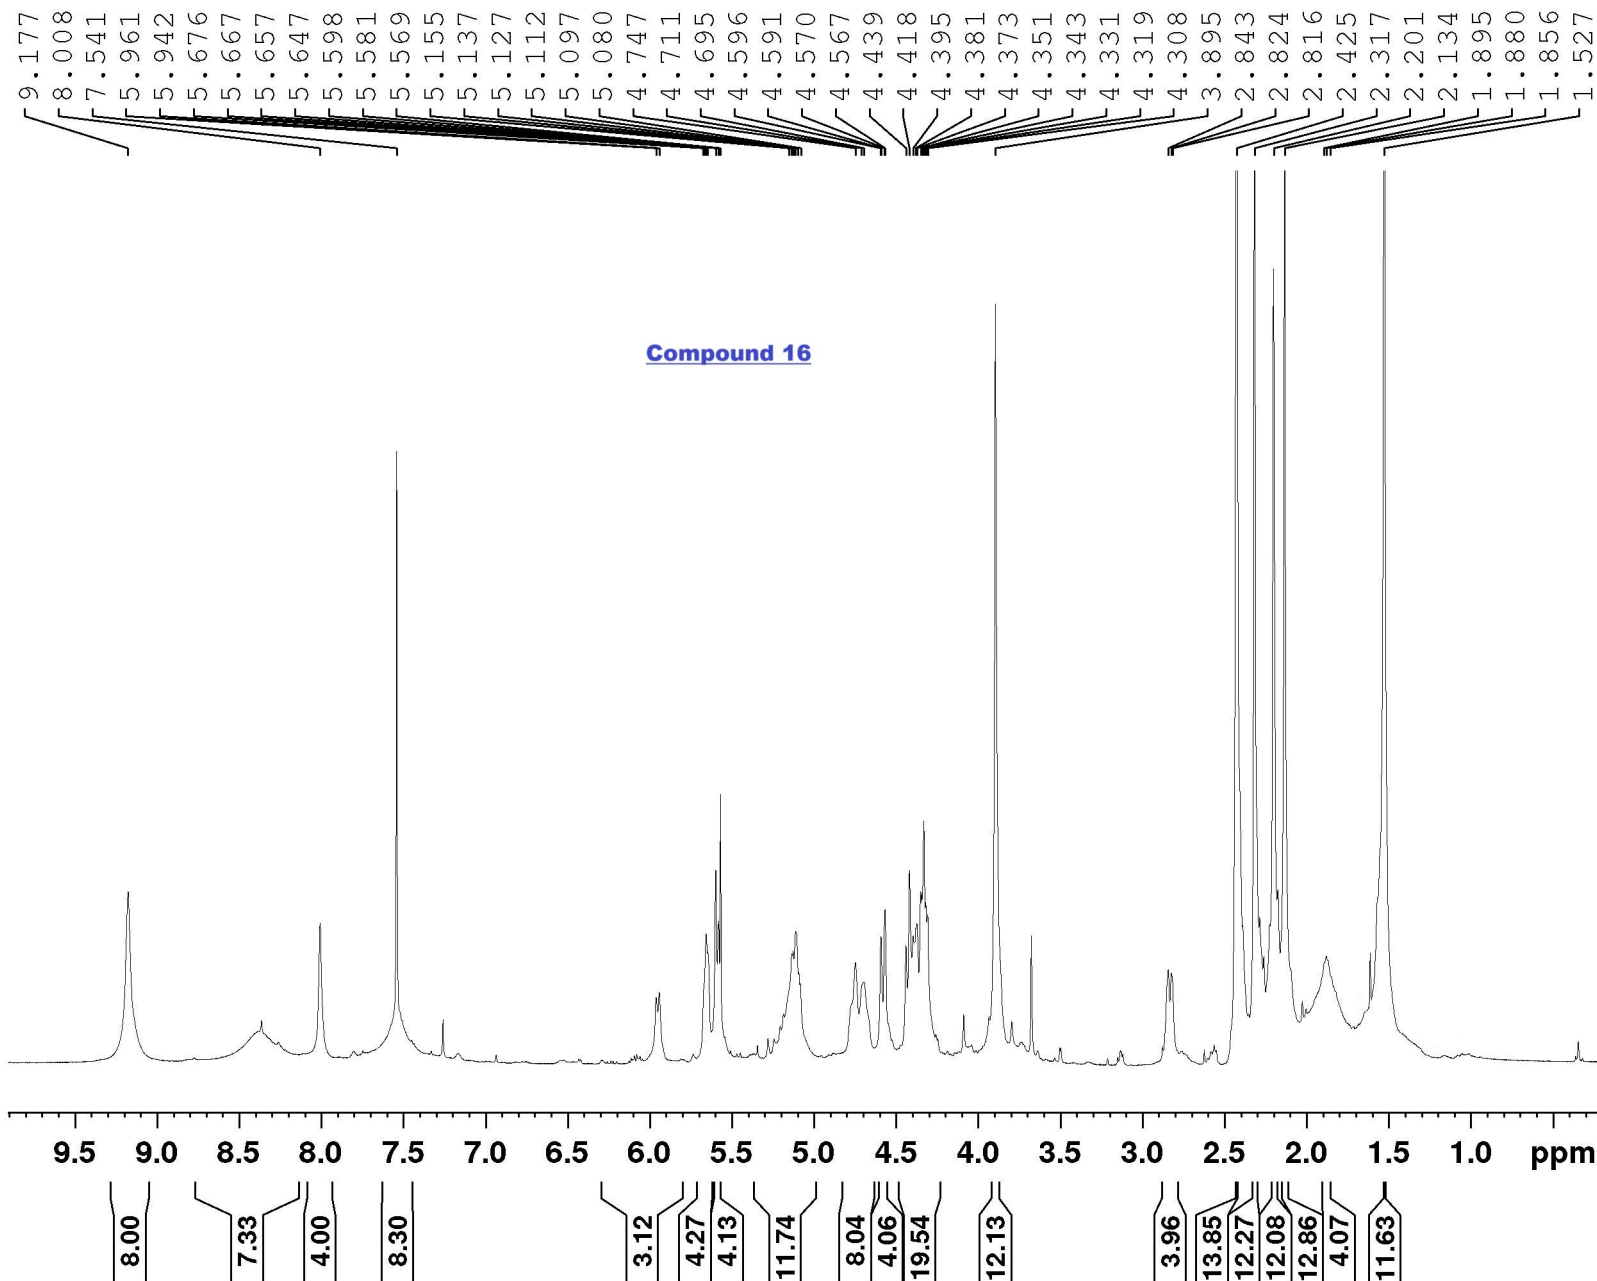

Current Data Parameters  
NAME BM-RD-033  
EXPNO 40  
PROCNO 1

F2 - Acquisition Parameters  
Date\_ 20210929  
Time 13.30  
INSTRUM Bruker\_default\_av500  
PROBHD 5 mm PABBO BB/  
PULPROG zg30  
TD 32768  
SOLVENT CDCl<sub>3</sub>  
NS 32  
DS 2  
SWH 10000.000 Hz  
FIDRES 0.305176 Hz  
AQ 1.6384000 sec  
RG 16  
DW 50.000 usec  
DE 6.50 usec  
TE 595.6 K  
D1 4.00000000 sec  
TDO 1

===== CHANNEL f1 =====  
SFO1 500.4530898 MHz  
NUC1 1H  
P1 30.00 usec  
PLW1 10.00000000 W

F2 - Processing parameters  
SI 16384  
SF 500.4498707 MHz  
WDW EM  
SSB 0  
LB 0.30 Hz  
GB 0  
PC 10.10

GROUP BM  
BM-RD-033 in CDCl<sub>3</sub>

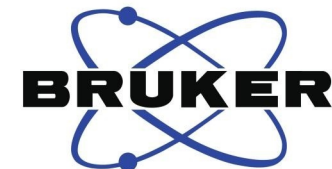

Current Data Parameters

NAME BM-RD-033  
EXPNO 41  
PROCNO 1

F2 - Acquisition Parameters

Date\_ 20210929  
Time 13.38  
INSTRUM Bruker\_default\_av500  
PROBHD 5 mm PABBO BB/  
PULPROG zgpg30  
TD 65536  
SOLVENT CDCl<sub>3</sub>  
NS 661  
DS 2  
SWH 37878.789 Hz  
FIDRES 0.577984 Hz  
AQ 0.8650752 sec  
RG 64  
DW 13.200 usec  
DE 6.50 usec  
TE 594.1 K  
D1 2.00000000 sec  
D11 0.03000000 sec  
TD0 1

===== CHANNEL f1 =====

SFO1 125.8508346 MHz  
NUC1 13C  
P1 11.50 usec  
PLW1 66.00000000 W

===== CHANNEL f2 =====

SFO2 500.4520014 MHz  
NUC2 1H  
CPDPRG[2] waltz16  
PCPD2 137.00 usec  
PLW2 10.00000000 W  
PLW12 0.47852001 W  
PLW13 0.24043630 W

F2 - Processing parameters

SI 32768  
SF 125.8382689 MHz  
WDW EM  
SSB 0  
LB 1.00 Hz  
GB 0  
PC 1.35

**Compound 16**

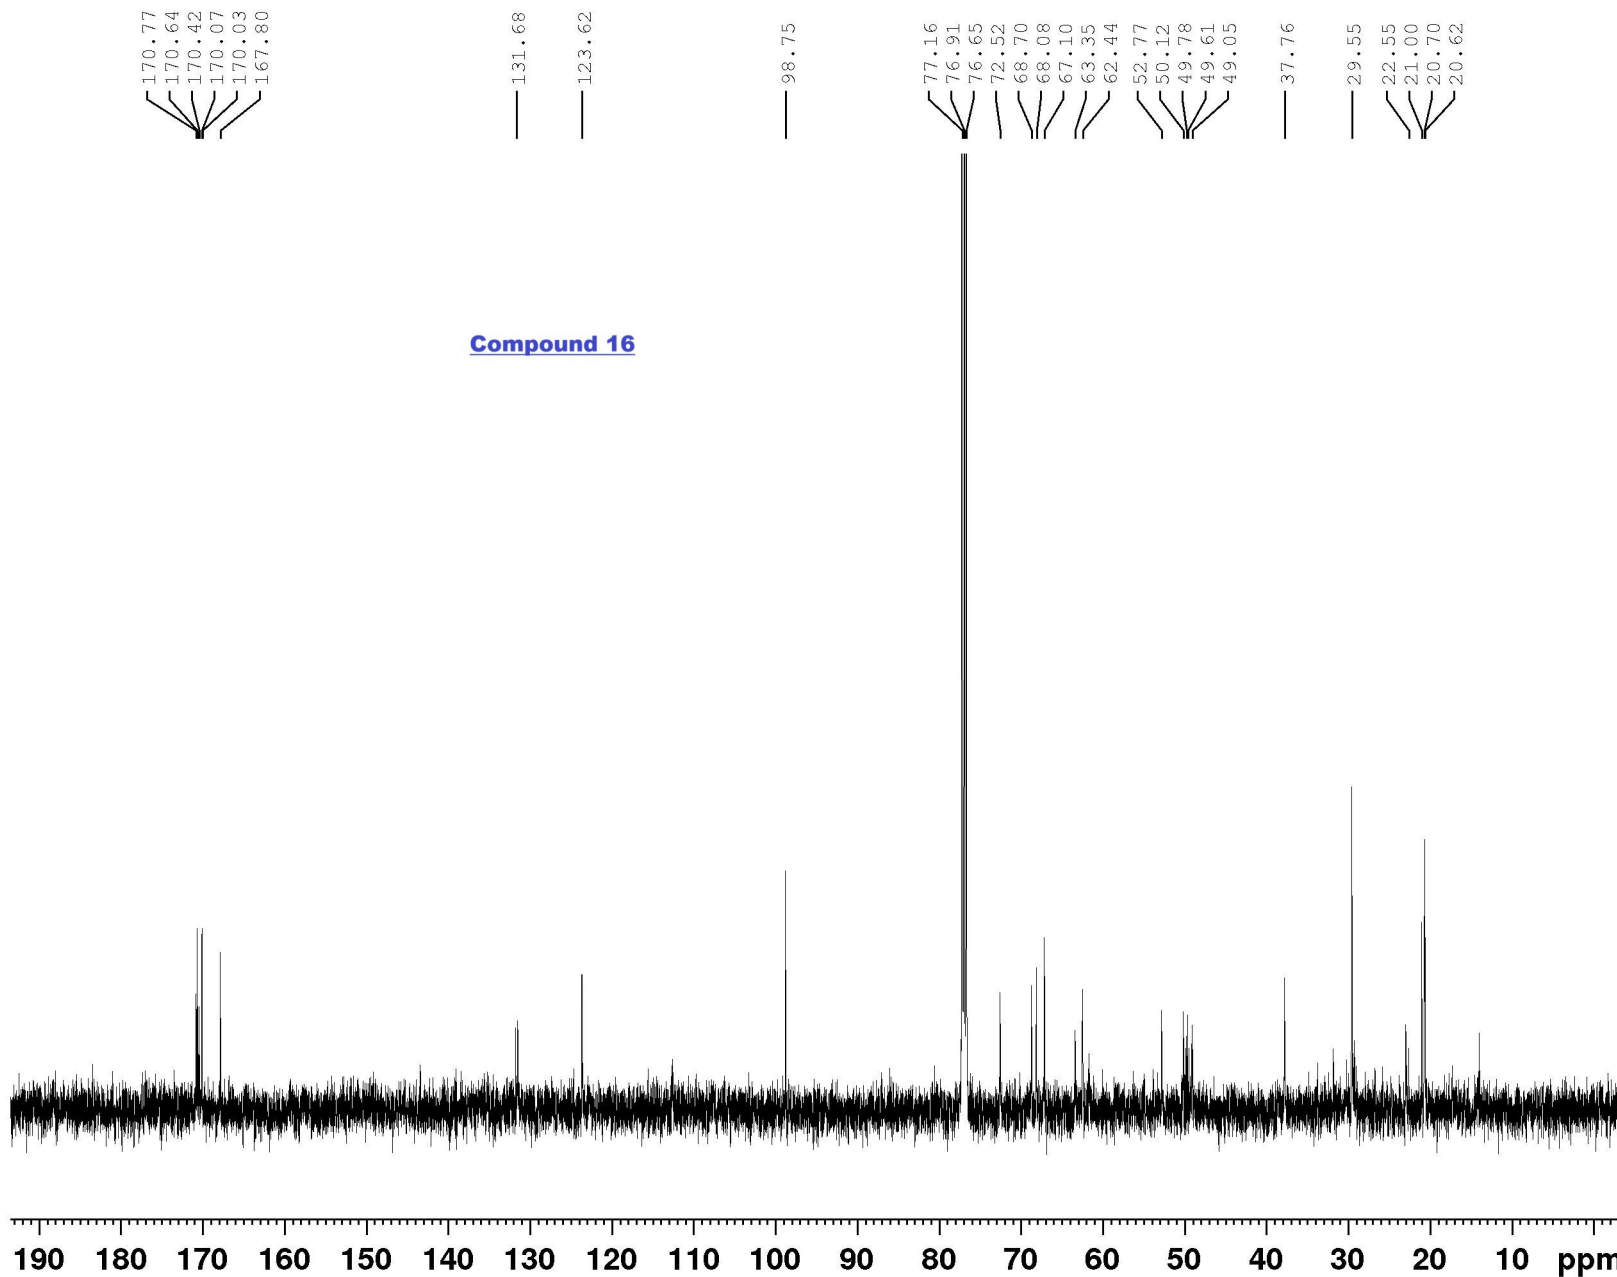

GROUP BM  
BM-RD-038C in CDCl<sub>3</sub>

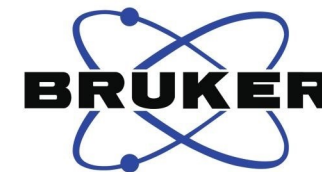

8.877  
8.145  
8.128  
7.722  
7.710  
7.345  
7.344  
5.424  
5.336  
5.323  
5.314  
5.287  
5.262  
5.245  
4.791  
4.776  
4.646  
4.588  
4.562  
4.535  
4.525  
4.517  
4.274  
4.252  
4.108  
4.095  
4.082  
4.011  
4.001  
3.983  
3.708  
3.693  
3.674  
3.619  
2.569  
2.560  
2.546  
2.536  
2.093  
2.054  
1.988  
1.964  
1.921  
1.896  
1.871  
1.791

Current Data Parameters  
NAME BM-RD-038C  
EXPNO 390  
PROCNO 1

F2 - Acquisition Parameters  
Date\_ 20211227  
Time 18.54  
INSTRUM Bruker\_default\_av500  
PROBHD 5 mm PABBO BB/  
PULPROG zg30  
TD 32768  
SOLVENT CDCl<sub>3</sub>  
NS 32  
DS 2  
SWH 10000.000 Hz  
FIDRES 0.305176 Hz  
AQ 1.6384000 sec  
RG 16  
DW 50.000 usec  
DE 6.50 usec  
TE 2717.9 K  
D1 4.00000000 sec  
TD0 1

===== CHANNEL f1 =====  
SFO1 500.4525023 MHz  
NUC1 1H  
P1 30.00 usec  
PLW1 10.00000000 W

F2 - Processing parameters  
SI 16384  
SF 500.4500068 MHz  
WDW EM  
SSB 0  
LB 0.30 Hz  
GB 0  
PC 10.10

**Compound 17**

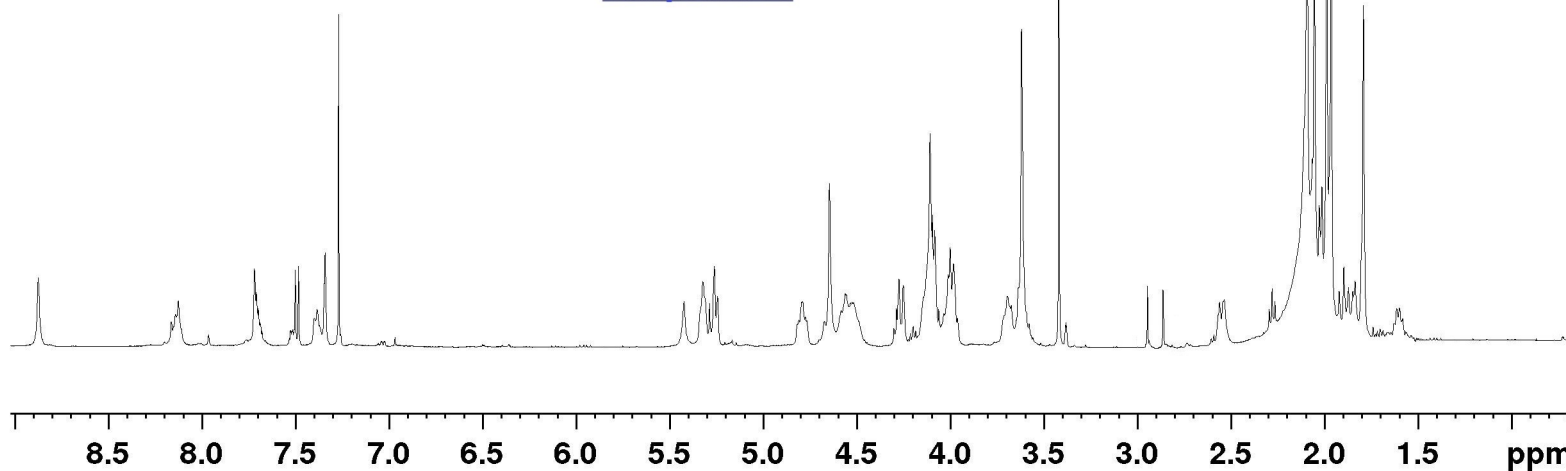

7.98  
11.79  
12.05  
8.13  
8.81  
24.34  
12.00  
48.45  
12.14  
36.56  
20.91  
12.42  
36.58  
12.31  
35.58  
35.73  
72.62  
12.71  
35.99

GROUP BM  
BM-RD-038C in CDCl<sub>3</sub>

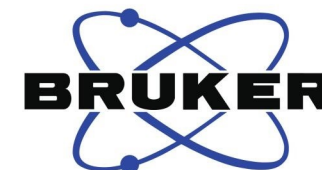

Current Data Parameters  
NAME BM-RD-038C  
EXPNO 393  
PROCNO 1

F2 - Acquisition Parameters  
Date\_ 20211227  
Time 19.35  
INSTRUM Bruker\_default\_av500  
PROBHD 5 mm PABBO BB/  
PULPROG zgpg30  
TD 65536  
SOLVENT CDCl<sub>3</sub>  
NS 12000  
DS 4  
SWH 37878.789 Hz  
FIDRES 0.577984 Hz  
AQ 0.8650752 sec  
RG 16  
DW 13.200 usec  
DE 6.50 usec  
TE 2671.8 K  
D1 2.00000000 sec  
D11 0.03000000 sec  
TD0 1

===== CHANNEL f1 =====  
SFO1 125.8508346 MHz  
NUC1 13C  
P1 11.50 usec  
PLW1 66.00000000 W

===== CHANNEL f2 =====  
SFO2 500.4520014 MHz  
NUC2 1H  
CPDPRG[2] waltz16  
PCPD2 137.00 usec  
PLW2 10.00000000 W  
PLW12 0.47852001 W  
PLW13 0.24043630 W

F2 - Processing parameters  
SI 32768  
SF 125.8382557 MHz  
WDW EM  
SSB 0  
LB 1.00 Hz  
GB 0  
PC 1.35

**Compound 17**

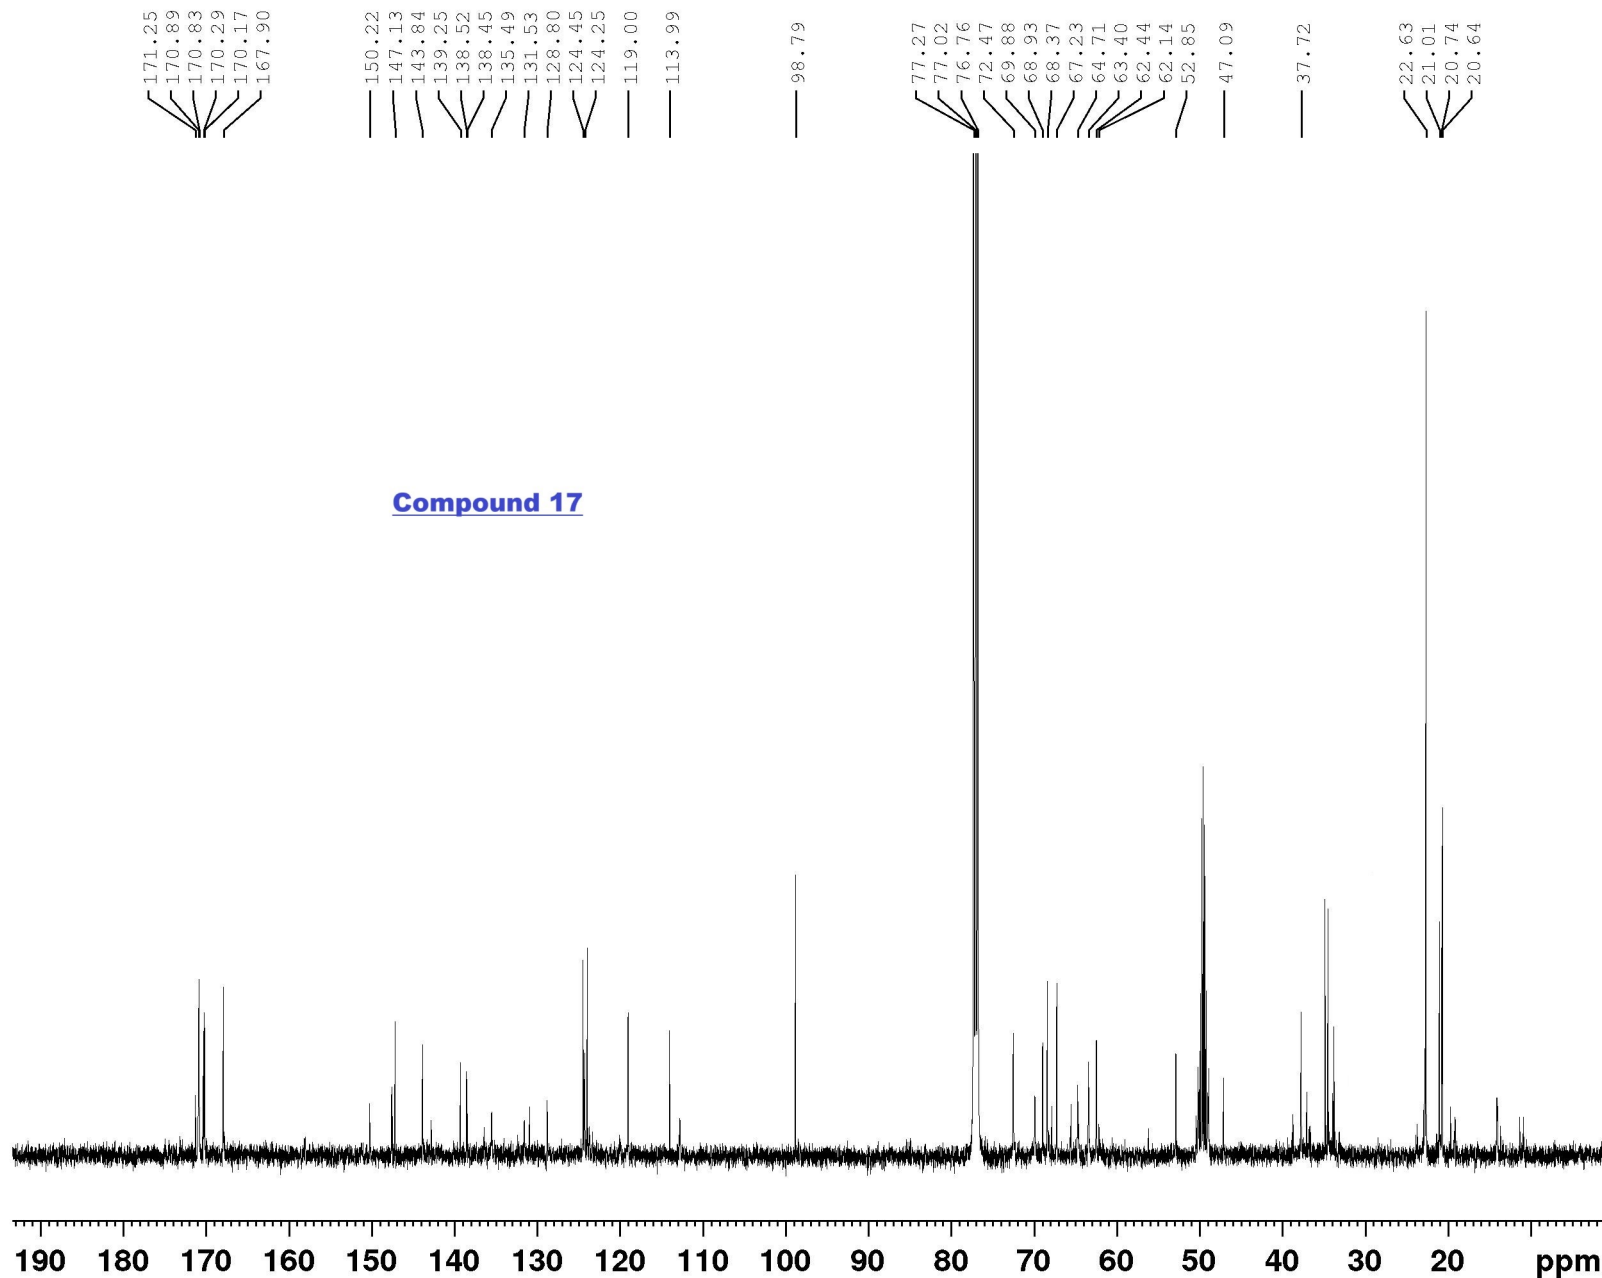

GROUP BM  
BM-RD-1STGENSIA in D2O

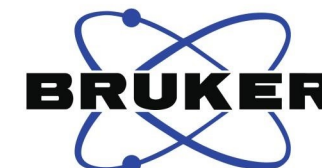

Current Data Parameters  
NAME BM-RD-1STGENSIA  
EXPNO 150  
PROCNO 1

F2 - Acquisition Parameters  
Date\_ 20220126  
Time 12.55  
INSTRUM Bruker\_default\_av500  
PROBHD 5 mm PABBO BB/  
PULPROG zg30  
TD 32768  
SOLVENT D2O  
NS 128  
DS 2  
SWH 10000.000 Hz  
FIDRES 0.305176 Hz  
AQ 1.6384000 sec  
RG 16  
DW 50.000 usec  
DE 6.50 usec  
TE 2390.7 K  
D1 8.00000000 sec  
TD0 1

===== CHANNEL f1 =====  
SFO1 500.4525023 MHz  
NUC1 1H  
P1 30.00 usec  
PLW1 10.00000000 W

F2 - Processing parameters  
SI 16384  
SF 500.4500000 MHz  
WDW EM  
SSB 0  
LB 0.30 Hz  
GB 0  
PC 10.10

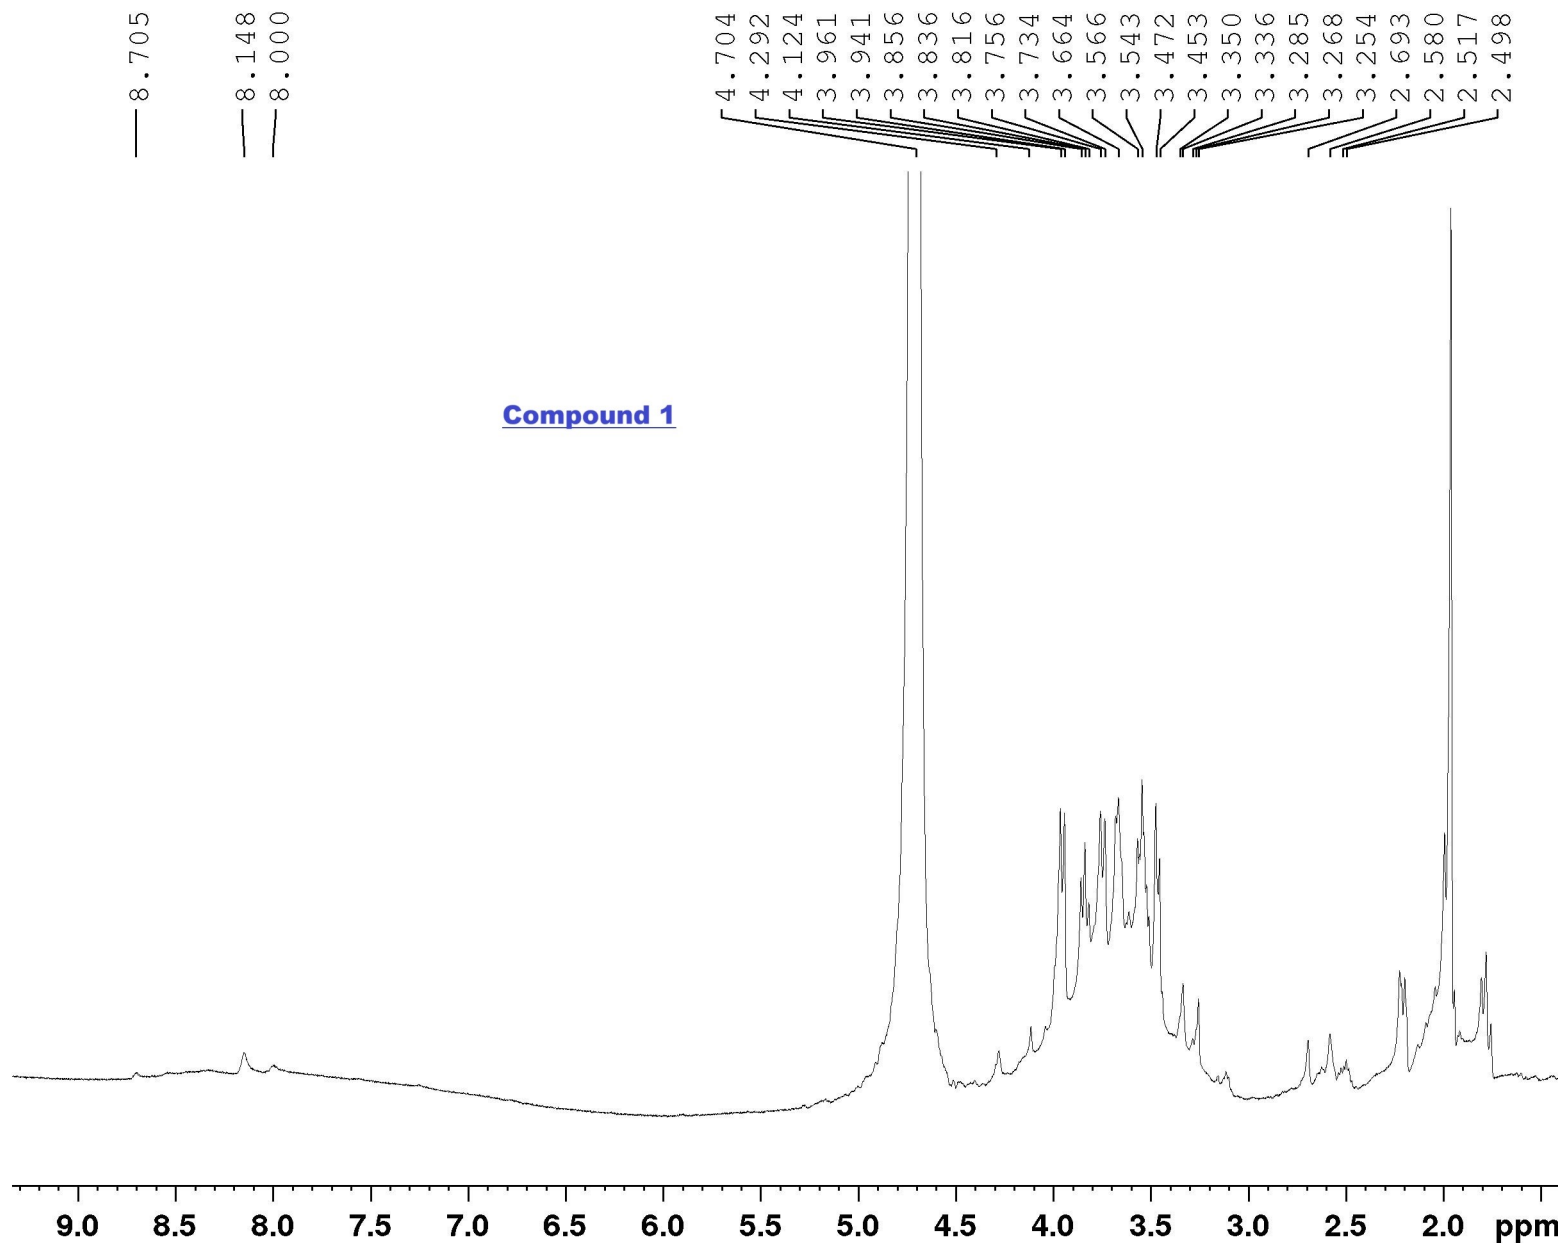

GROUP BM  
BM-RD-SIAP in D2O

174.85

96.04

78.72

72.05

70.39

70.21

68.28

67.83

66.81

63.17

62.48

62.02

52.10

38.93

29.73

22.07

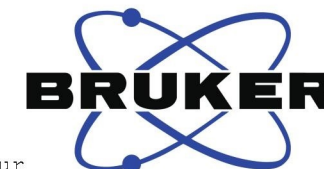

Cur  
NAME BM-RD-1STGENSIA  
EXPNO 842  
PROCNO 1

F2 - Acquisition Parameters  
Date\_ 20220123  
Time 4.11 h  
INSTRUM AV4 500MHz  
PROBHD Z119467\_0011 (  
PULPROG zgpg30  
TD 65536  
SOLVENT D2O  
NS 25000  
DS 4  
SWH 30120.482 Hz  
FIDRES 0.919204 Hz  
AQ 1.0878977 sec  
RG 101  
DW 16.600 usec  
DE 6.50 usec  
TE 299.6 K  
D1 2.00000000 sec  
D11 0.03000000 sec  
TD0 1  
SFO1 125.7728791 MHz  
NUC1 13C  
P0 3.33 usec  
P1 10.00 usec  
PLW1 77.33000183 W  
SFO2 500.1420006 MHz  
NUC2 1H  
CPDPRG[2] waltz65  
PCPD2 80.00 usec  
PLW2 13.47399998 W  
PLW12 0.41264001 W  
PLW13 0.20756000 W

F2 - Processing parameters  
SI 32768  
SF 125.7603030 MHz  
WDW EM  
SSB 0  
LB 1.00 Hz  
GB 0  
PC 1.40

**Compound 1**

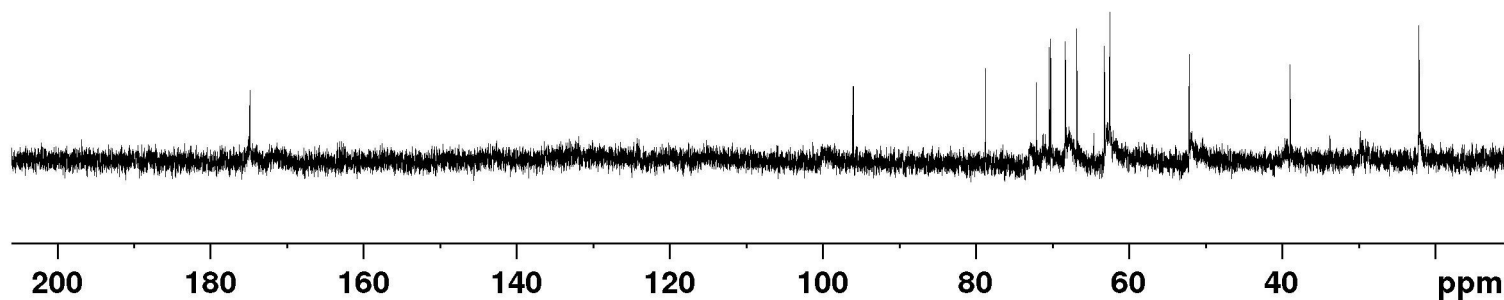

GROUP BM  
BM-RD-2NDGENSIA in D2O

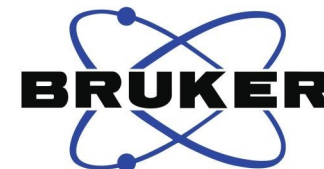

Current Data Parameters  
NAME BM-RD-2NDGENSIA  
EXPNO 400  
PROCNO 1

F2 - Acquisition Parameters  
Date\_ 20220125  
Time 17.00  
INSTRUM Bruker\_default\_av500  
PROBHD 5 mm PABBO BB/  
PULPROG zg30  
TD 32768  
SOLVENT D2O  
NS 64  
DS 2  
SWH 10000.000 Hz  
FIDRES 0.305176 Hz  
AQ 1.6384000 sec  
RG 16  
DW 50.000 usec  
DE 6.50 usec  
TE 2413.1 K  
D1 1.00000000 sec  
TD0 1

===== CHANNEL f1 =====  
SFO1 500.4525023 MHz  
NUC1 1H  
P1 30.00 usec  
PLW1 10.00000000 W

F2 - Processing parameters  
SI 16384  
SF 500.4500000 MHz  
WDW EM  
SSB 0  
LB 0.30 Hz  
GB 0  
PC 10.10

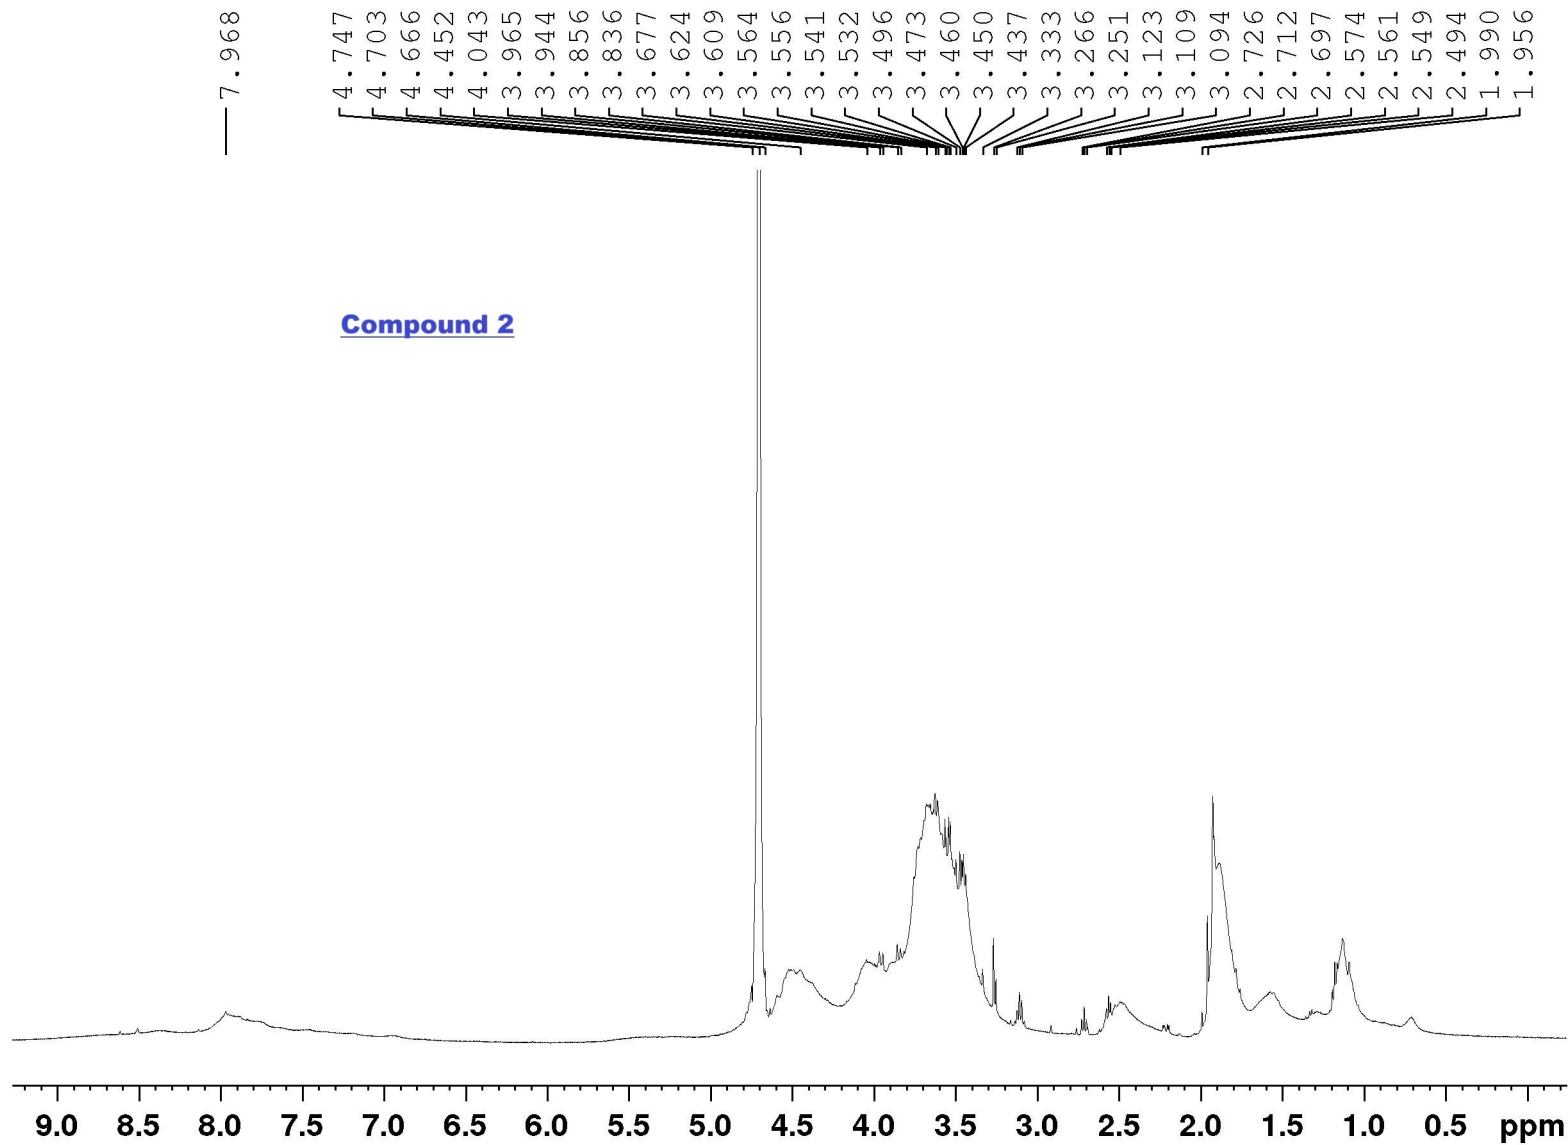

GROUP BM  
BM-RD-2NDGENSIA in D2O

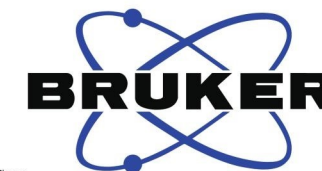

Current Data Parameters  
NAME BM-RD-2NDGENSIA  
EXPNO 404  
PROCNO 1

F2 - Acquisition Parameters  
Date\_ 20220125  
Time 18.12  
INSTRUM Bruker\_default\_av500  
PROBHD 5 mm PABBO BB/  
PULPROG zgpg30  
TD 65536  
SOLVENT D2O  
NS 19827  
DS 4  
SWH 37878.789 Hz  
FIDRES 0.577984 Hz  
AQ 0.8650752 sec  
RG 16  
DW 13.200 usec  
DE 6.50 usec  
TE 2438.8 K  
D1 2.00000000 sec  
D11 0.03000000 sec  
TD0 1

===== CHANNEL f1 =====  
SFO1 125.8508346 MHz  
NUC1 13C  
P1 11.50 usec  
PLW1 66.00000000 W

===== CHANNEL f2 =====  
SFO2 500.4520014 MHz  
NUC2 1H  
CPDPRG[2] waltz16  
PCPD2 137.00 usec  
PLW2 10.00000000 W  
PLW12 0.47852001 W  
PLW13 0.24043630 W

F2 - Processing parameters  
SI 32768  
SF 125.8382574 MHz  
WDW EM  
SSB 0  
LB 1.00 Hz  
GB 0  
PC 1.35

### Compound 2

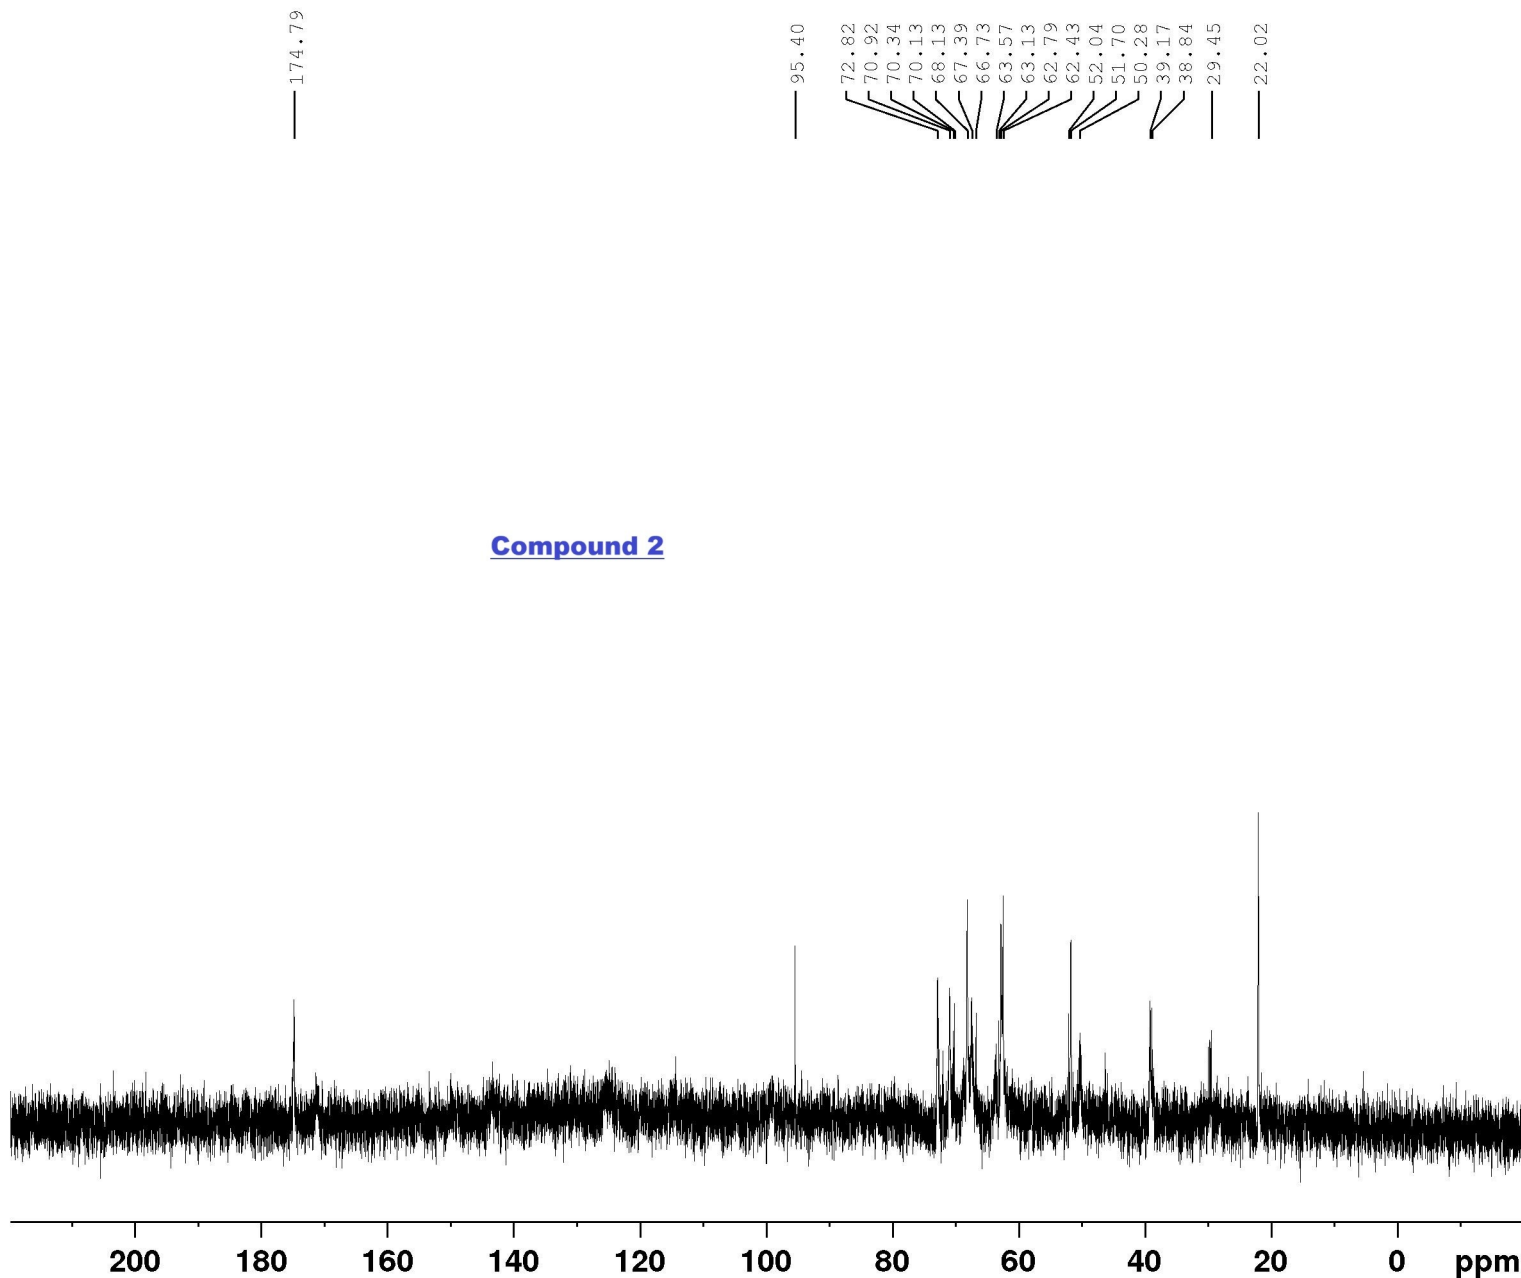



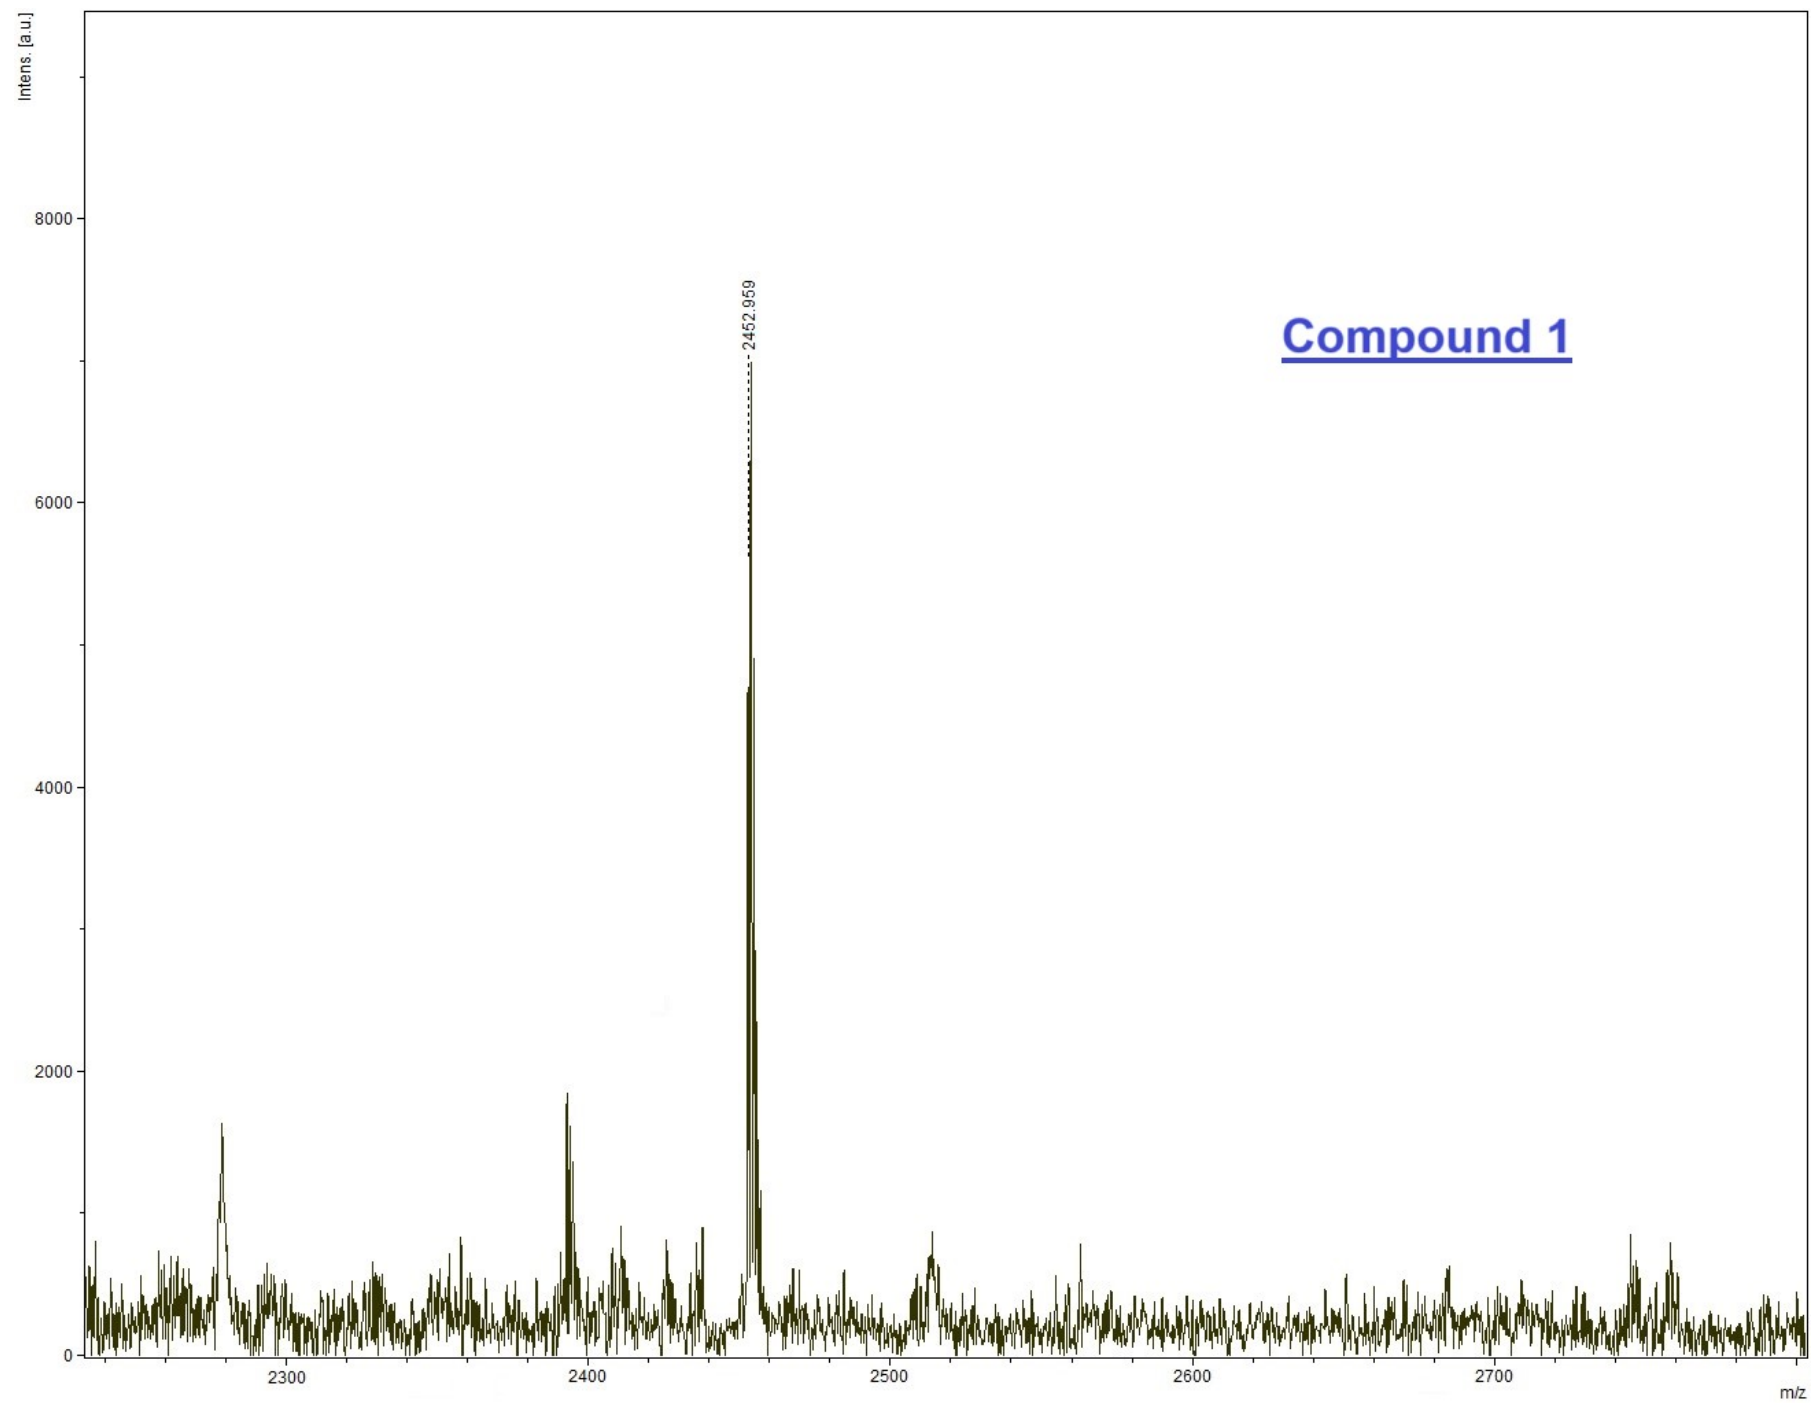

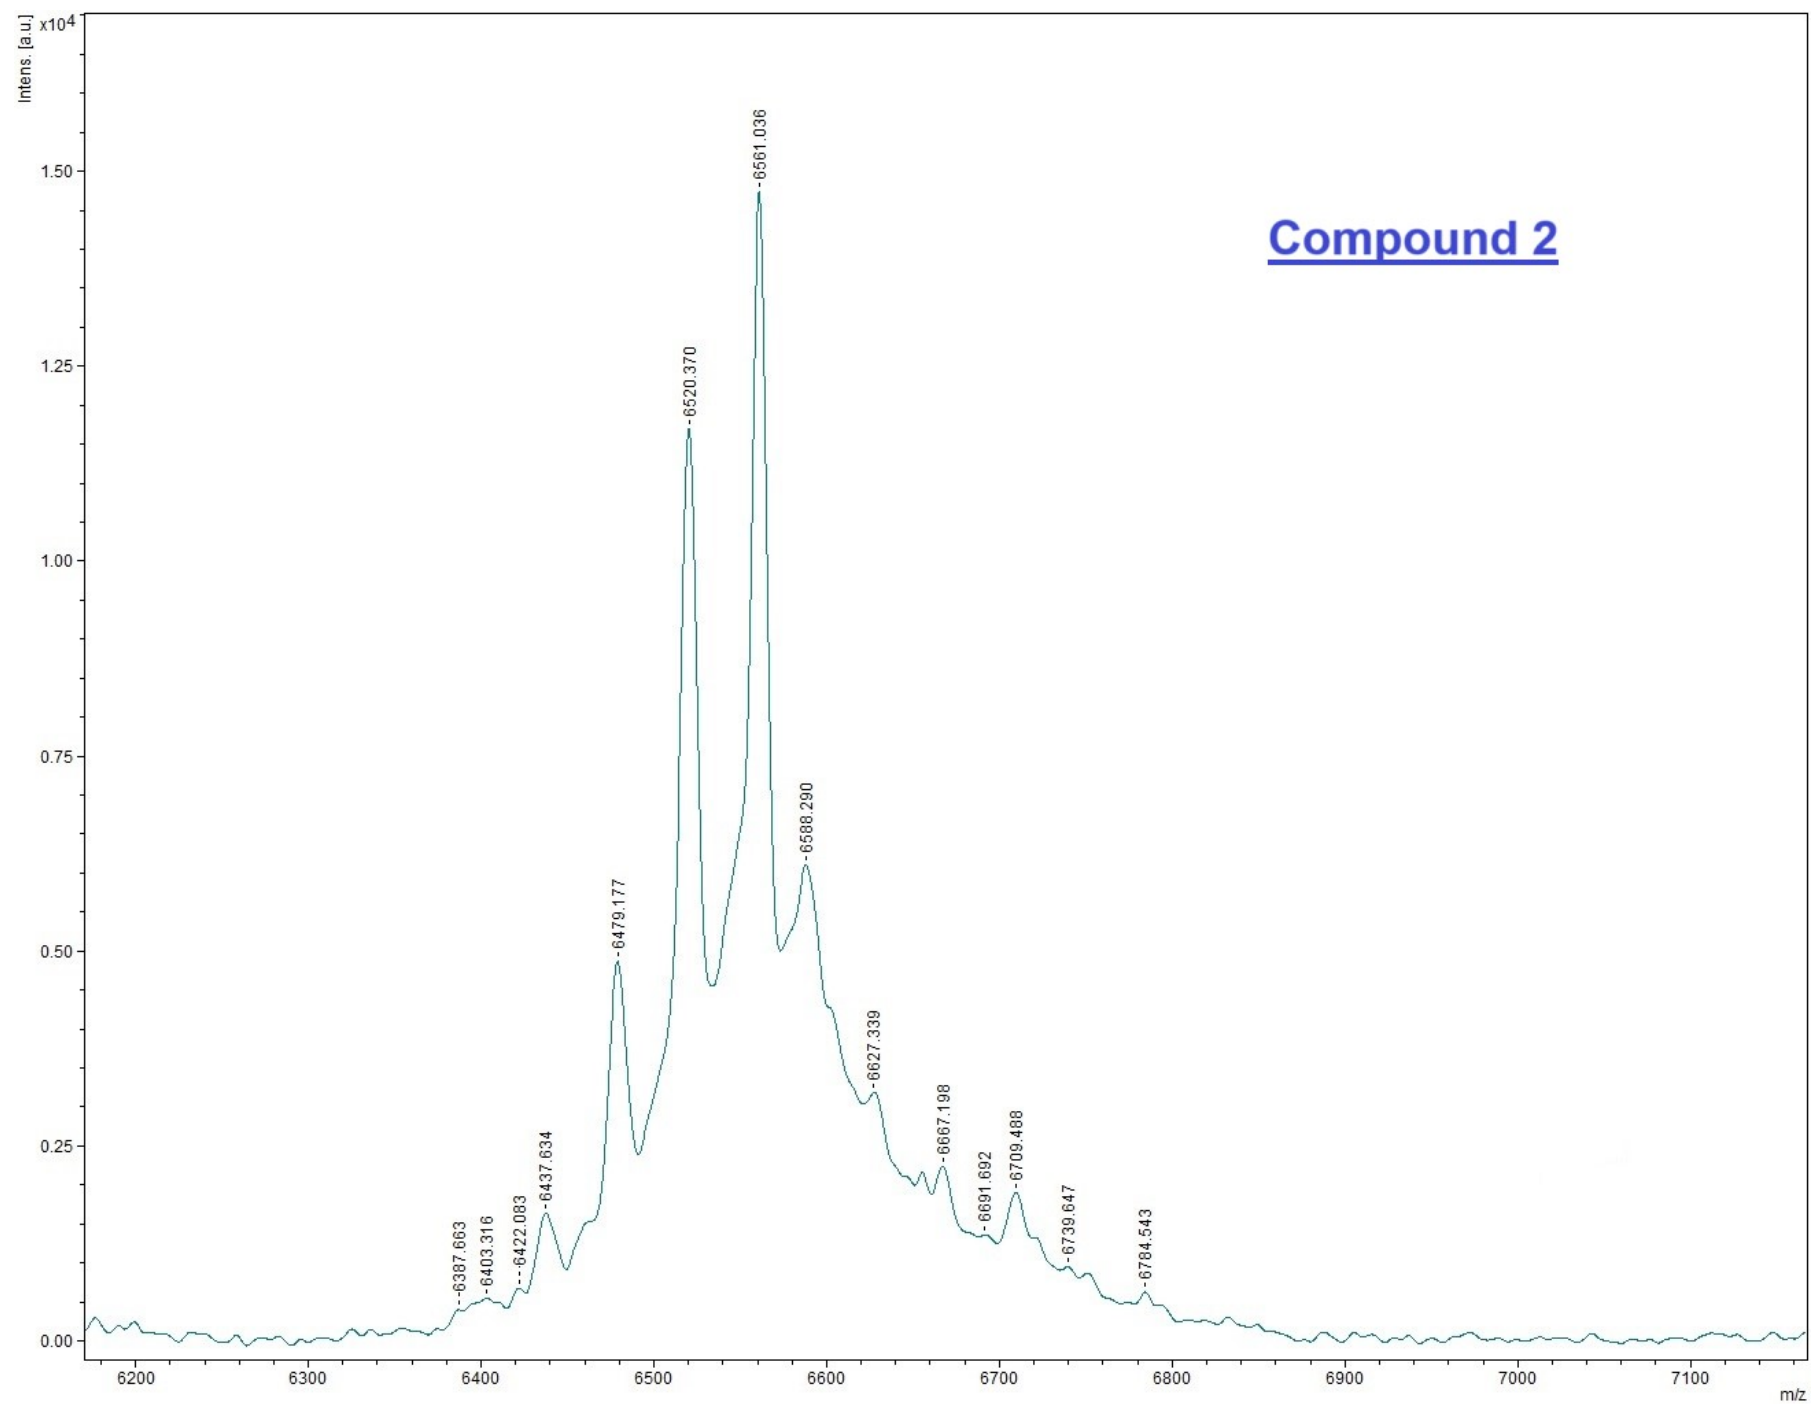

Supplement: Supplementary file 1 [file 0f88ccd0cddd85b0138c8dc8.pdf]
