# Supplementary material for: Photolytic degradation of Alzheimer's amyloid Aβ42-fibrils by sialic acid decorated glycodendrimers
Source: Research Square preprint supplement (doi:10.21203/rs.3.rs-6562396/v1), 2025-05-07
Supplement: Supplementary file 1 [file Figure 2.xlsx]

## Sheet: 2A
Absorbance
	16	17	Porphyrin
600	0	0	-0.002
598	0	0	-0.001
596	0	0	-0.001
594	0.001	0	0
592	0.001	0	0.001
590	0.002	-0.001	0.002
588	0.002	-0.002	0.002
586	0.002	-0.002	0.003
584	0.002	-0.002	0.002
582	0.001	-0.002	0.002
580	0	-0.002	0.001
578	0	-0.002	-0.001
576	-0.001	-0.002	-0.002
574	-0.001	-0.002	-0.003
572	-0.001	-0.001	-0.002
570	0	-0.001	-0.002
568	0.001	0	-0.002
566	0.001	0	-0.001
564	0.002	0.001	-0.001
562	0.003	0.002	0.001
560	0.004	0.003	0.002
558	0.005	0.004	0.003
556	0.006	0.005	0.004
554	0.006	0.005	0.006
552	0.006	0.006	0.007
550	0.007	0.006	0.008
548	0.007	0.006	0.009
546	0.006	0.005	0.009
544	0.006	0.004	0.009
542	0.005	0.003	0.008
540	0.004	0.002	0.006
538	0.003	0	0.005
536	0.002	-0.001	0.004
534	0.002	-0.001	0.004
532	0.001	-0.002	0.003
530	0.001	-0.002	0.002
528	0	-0.003	0.001
526	0	-0.003	0.001
524	0	-0.003	0.001
522	0	-0.004	0
520	0	-0.004	0
518	0	-0.003	0
516	0	-0.003	0.001
514	0.001	-0.003	0
512	0	-0.003	0
510	0	-0.003	0
508	0	-0.003	0
506	0	-0.003	0
504	0	-0.003	0
502	0	-0.003	-0.001
500	-0.001	-0.003	-0.001
498	-0.002	-0.003	-0.001
496	-0.003	-0.003	-0.001
494	-0.003	-0.004	-0.001
492	-0.003	-0.004	-0.001
490	-0.003	-0.004	-0.001
488	-0.003	-0.004	-0.001
486	-0.003	-0.004	-0.001
484	-0.003	-0.004	0
482	-0.003	-0.004	0
480	-0.003	-0.004	0
478	-0.002	-0.004	0
476	-0.002	-0.003	-0.001
474	-0.002	-0.003	-0.001
472	-0.001	-0.002	-0.001
470	-0.001	-0.002	-0.001
468	0	-0.002	-0.001
466	0	-0.002	0
464	0	-0.001	0
462	0.002	0	0.002
460	0.002	0.001	0.003
458	0.003	0.002	0.005
456	0.003	0.002	0.007
454	0.004	0.003	0.008
452	0.004	0.003	0.01
450	0.003	0.003	0.012
448	0.004	0.002	0.013
446	0.004	0.002	0.013
444	0.004	0.002	0.014
442	0.005	0.003	0.013
440	0.005	0.006	0.014
438	0.015	0.012	0.015
436	0.023	0.023	0.018
434	0.048	0.04	0.023
432	0.07	0.069	0.033
430	0.114	0.112	0.052
428	0.181	0.167	0.086
426	0.224	0.224	0.137
424	0.263	0.268	0.202
422	0.283	0.282	0.262
420	0.275	0.262	0.292
418	0.24	0.216	0.276
416	0.188	0.161	0.224
414	0.137	0.111	0.161
412	0.097	0.073	0.107
410	0.069	0.048	0.07
408	0.052	0.033	0.046
406	0.042	0.025	0.032
404	0.036	0.021	0.025
402	0.033	0.019	0.022
400	0.03	0.017	0.022
398	0.027	0.014	0.021
396	0.024	0.01	0.019
394	0.021	0.007	0.015
392	0.018	0.004	0.012
390	0.015	0.001	0.008
388	0.013	-0.001	0.006
386	0.011	-0.003	0.004
384	0.011	-0.003	0.004
382	0.01	-0.003	0.004
380	0.01	-0.004	0.003
378	0.009	-0.004	0.002
376	0.007	-0.004	0.001
374	0.007	-0.004	0.001
372	0.007	-0.004	0.001
370	0.007	-0.004	0.001
368	0.009	-0.005	0.003
366	0.011	-0.006	0.006
364	0.012	-0.006	0.007
362	0.012	-0.006	0.007
360	0.012	-0.006	0.007
358	0.013	-0.005	0.007
356	0.013	-0.005	0.007
354	0.013	-0.004	0.008
352	0.013	-0.004	0.008
350	0.014	-0.005	0.008
348	0.014	-0.005	0.008
346	0.014	-0.005	0.008
344	0.015	-0.005	0.009
342	0.015	-0.005	0.009
340	0.015	-0.005	0.008
338	0.016	-0.004	0.008
336	0.016	-0.004	0.009
334	0.017	-0.004	0.009
332	0.018	-0.004	0.008
330	0.018	-0.004	0.008
328	0.019	-0.004	0.008
326	0.019	-0.004	0.008
324	0.02	-0.004	0.009
322	0.02	-0.004	0.009
320	0.02	-0.004	0.009
318	0.02	-0.004	0.009
316	0.02	-0.004	0.009
314	0.02	-0.004	0.009
312	0.021	-0.003	0.01
310	0.021	-0.003	0.01
308	0.021	-0.003	0.011
306	0.022	-0.003	0.011
304	0.022	-0.003	0.011
302	0.022	-0.003	0.011
300	0.022	-0.004	0.011
298	0.021	-0.004	0.011
296	0.021	-0.004	0.011
294	0.02	-0.005	0.011
292	0.02	-0.005	0.01
290	0.019	-0.005	0.009
288	0.019	-0.006	0.009
286	0.02	-0.006	0.009
284	0.02	-0.005	0.008
282	0.02	-0.005	0.008
280	0.021	-0.005	0.007
278	0.021	-0.005	0.007
276	0.021	-0.005	0.007
274	0.021	-0.004	0.007
272	0.022	-0.003	0.007
270	0.022	-0.003	0.007
268	0.022	-0.003	0.008
266	0.022	-0.003	0.008
264	0.022	-0.003	0.008
262	0.022	-0.003	0.008
260	0.023	-0.003	0.008
258	0.023	-0.004	0.009
256	0.024	-0.004	0.009
254	0.025	-0.004	0.009
252	0.025	-0.005	0.009
250	0.026	-0.005	0.009

## Sheet: 2B
Raw Fluorescence Intensity								Normalized Intensity								Kd(nM)
	1			2					1			2					1	2
	Set 1	Set 2	Set 3	Set 1	Set 2	Set 3			Set 1	Set 2	Set 3	Set 1	Set 2	Set 3		Set 1	406.6	221.1
0	832	920	903	766	760	766		0	0	0	0	0	0	0		Set 2	575.2	206.7
10	1015	1030	925	954	783	915		10	0.14687	0.078236	0.017814	0.169065	0.024946	0.143269		Set 3	257	274.4
50	1172	1050	965	1046	1018	1045		50	0.272873	0.092461	0.050202	0.251799	0.279826	0.268269
100	1259	1185	1131	1257	1153	1201		100	0.342697	0.188478	0.184615	0.441547	0.426247	0.418269
200	1261	1327	1229	1257	1205	1255		200	0.344302	0.289474	0.263968	0.441547	0.482646	0.470192
500	1589	1440	2067	1586	1359	1465		500	0.607544	0.369844	0.94251	0.73741	0.649675	0.672115
1000	1854	2033	2069	1685	1566	1568		1000	0.820225	0.791607	0.94413	0.826439	0.874187	0.771154
10000	2078	2326	2138	1878	1682	1802		10000	1	1	1	1	1	1

## Sheet: 2C
Raw data CD (mdeg)													Molar Elipticity
	0 hr			12hrs			24hrs			48hrs			Wavelength(nm)	0 hr			12hrs			24hrs			48hrs
Wavelength(nm)	Set 1	Set 2	Set 3	Set 1	Set 2	Set 3	Set 1	Set 2	Set 3	Set 1	Set 2	Set 3		Set 1	Set 2	Set 3	Set 1	Set 2	Set 3	Set 1	Set 2	Set 3	Set 1	Set 2	Set 3
300	-0.02879	0.03786	0.07121	-0.06718	-0.1086	-0.2362	-0.31422	-0.2717	-0.2799	-0.2159	-0.3271	-0.4042	300	-1.44398	1.89889	3.57158	-3.36945	-5.44689	-11.8467	-15.7599	-13.6273	-14.0385	-10.8286	-16.4059	-20.2729
299	-0.03102	0.00859	0.00376	-0.06223	-0.0818	0.00129	-0.31622	-0.4052	-0.3576	-0.22518	-0.15627	-0.03494	299	-1.55583	0.430836	0.188585	-3.12118	-4.10272	0.0647007	-15.8602	-20.323	-17.9356	-11.294	-7.83781	-1.75244
298	-0.03481	0.03637	-0.0463	-0.05254	-0.1343	0.07928	-0.31714	-0.31	-0.4486	-0.23406	-0.30009	-0.38189	298	-1.74591	1.82416	-2.3222	-2.63517	-6.73589	3.97633	-15.9063	-15.5482	-22.4998	-11.7394	-15.0512	-19.1539
297	-0.05284	0.015183	0.021286	-0.06857	-0.0023	-0.19363	-0.32147	-0.41964	-0.16636	-0.23649	-0.41805	-0.11645	297	-2.65022	0.761512	1.06761	-3.43917	-0.115358	-9.71162	-16.1235	-21.0473	-8.34388	-11.8613	-20.9675	-5.84061
296	-0.04058	-0.07181	-0.06795	-0.03641	0.032467	-0.16261	-0.32248	-0.26896	-0.18464	-0.24476	-0.17555	-0.1483	296	-2.03531	-3.60167	-3.40807	-1.82616	1.6284	-8.15579	-16.1742	-13.4898	-9.26072	-12.2761	-8.80481	-7.43807
295	-0.02951	-0.06692	-0.07601	-0.03151	0.023871	-0.03102	-0.3337	-0.50734	-0.45824	-0.25145	-0.25406	-0.39271	295	-1.48009	-3.35641	-3.81232	-1.5804	1.19726	-1.55583	-16.7369	-25.4459	-22.9833	-12.6116	-12.7425	-19.6966
294	-0.02438	0.006011	-0.08976	-0.0781	-0.04695	0.013495	-0.34181	-0.45736	-0.41554	-0.2568	-0.09277	-0.34502	294	-1.22279	0.301485	-4.50196	-3.91715	-2.3548	0.676849	-17.1437	-22.9391	-20.8416	-12.8799	-4.65293	-17.3047
293	-0.02275	-0.08161	-0.04904	-0.06024	-0.01986	0.088739	-0.34577	-0.30008	-0.52592	-0.26501	-0.16962	-0.25308	293	-1.14104	-4.09319	-2.45963	-3.02137	-0.996089	4.45075	-17.3423	-15.0507	-26.3778	-13.2917	-8.50739	-12.6934
292	-0.01946	0.043884	-0.05408	-0.06909	-0.04724	-0.17175	-0.34834	-0.24658	-0.19709	-0.26732	-0.25465	-0.3009	292	-0.976027	2.20103	-2.71241	-3.46525	-2.36935	-8.61422	-17.4712	-12.3674	-9.88516	-13.4076	-12.7721	-15.0918
291	-0.00919	0.076976	-0.02519	-0.06785	-0.09133	-0.08059	-0.35962	-0.54277	-0.18203	-0.26576	-0.39314	-0.22689	291	-0.46093	3.86077	-1.26342	-3.40305	-4.58071	-4.04204	-18.0369	-27.2229	-9.12982	-13.3293	-19.7182	-11.3798
290	-0.03505	0.002469	-0.0596	-0.07493	0.022532	-0.02662	-0.36426	-0.31651	-0.21608	-0.26877	-0.45068	-0.24846	290	-1.75795	0.123834	-2.98927	-3.75816	1.1301	-1.33514	-18.2697	-15.8747	-10.8376	-13.4803	-22.6041	-12.4616
289	-0.05864	-0.02798	-0.09983	-0.05381	-0.07361	-0.03467	-0.37176	-0.18848	-0.3827	-0.26336	-0.12802	-0.38276	289	-2.94112	-1.40335	-5.00703	-2.69887	-3.69195	-1.73889	-18.6458	-9.45332	-19.1945	-13.209	-6.42091	-19.1975
288	-0.03526	-0.0554	-0.00229	-0.02334	-0.10311	0.08817	-0.37251	-0.17442	-0.42019	-0.25742	-0.29896	-0.17141	288	-1.76848	-2.77862	-0.114856	-1.17063	-5.17154	4.42222	-18.6834	-8.74813	-21.0749	-12.911	-14.9945	-8.59716
287	-0.02789	-0.0519	-0.05399	-0.07441	-0.05011	-0.01935	-0.37384	-0.17664	-0.24493	-0.25899	-0.40204	-0.08379	287	-1.39884	-2.60307	-2.7079	-3.73207	-2.51329	-0.97051	-18.7502	-8.85948	-12.2846	-12.9898	-20.1645	-4.20253
286	-0.02704	-0.02202	0.009676	-0.08529	-0.12345	0.088882	-0.37297	-0.35348	-0.41972	-0.26257	-0.41912	-0.33598	286	-1.35621	-1.10443	0.485305	-4.27777	-6.1917	4.45793	-18.7065	-17.729	-21.0513	-13.1693	-21.0212	-16.8513
285	-0.0151	0.078063	0.024151	-0.08723	-0.12643	-0.12348	-0.36875	-0.50916	-0.27627	-0.26117	-0.43825	-0.38989	285	-0.757349	3.91529	1.21131	-4.37507	-6.34117	-6.19321	-18.4949	-25.5372	-13.8565	-13.0991	-21.9807	-19.5551
284	-0.03195	-0.0523	0.001424	-0.07843	0.020925	0.064986	-0.36628	-0.2406	-0.39655	-0.26426	-0.14611	-0.41462	284	-1.60247	-2.62314	0.0714215	-3.9337	1.0495	3.25941	-18.371	-12.0674	-19.8892	-13.2541	-7.32823	-20.7955
283	-0.02288	-0.10011	-0.03899	-0.04054	-0.00915	-0.16428	-0.36098	-0.52128	-0.34428	-0.27249	-0.0856	-0.36345	283	-1.14756	-5.02107	-1.95557	-2.03331	-0.458923	-8.23955	-18.1052	-26.1451	-17.2676	-13.6669	-4.29332	-18.229
282	-0.01764	-0.0564	-0.05038	-0.05828	-0.12392	0.099098	-0.34823	-0.14902	-0.33613	-0.28422	-0.48065	-0.27787	282	-0.884744	-2.82877	-2.52684	-2.92307	-6.21528	4.97032	-17.4657	-7.47418	-16.8588	-14.2552	-24.1073	-13.9367
281	-0.04261	0.020597	0.020174	-0.08631	0.008757	-0.11272	-0.35059	-0.17212	-0.37101	-0.28946	-0.31735	-0.10847	281	-2.13713	1.03305	1.01184	-4.32893	0.439212	-5.65353	-17.584	-8.63277	-18.6082	-14.518	-15.9169	-5.44037
280	0.00605	-0.05617	0.034444	-0.06594	-0.04826	0.11371	-0.35756	-0.33674	-0.49899	-0.29221	-0.38245	-0.09344	280	0.303441	-2.81724	1.72756	-3.30726	-2.42051	5.70319	-17.9336	-16.8894	-25.0271	-14.656	-19.182	-4.68654
279	-0.00176	0.045539	0.074141	-0.01624	0.019364	0.119171	-0.35384	-0.17237	-0.48961	-0.29768	-0.16089	-0.24435	279	-0.0882738	2.28403	3.71858	-0.814526	0.971212	5.97709	-17.747	-8.64531	-24.5567	-14.9303	-8.06953	-12.2555
278	-0.03	-0.09675	0.02735	-0.04262	-0.12875	0.153996	-0.35102	-0.20634	-0.21417	-0.30185	-0.10222	-0.19294	278	-1.50467	-4.85255	1.37175	-2.13763	-6.45753	7.72375	-17.6056	-10.3491	-10.7418	-15.1395	-5.1269	-9.67701
277	-0.00467	-0.05635	-0.0569	-0.07178	-0.12003	-0.04583	-0.3511	-0.44584	-0.35979	-0.29779	-0.42372	-0.40678	277	-0.234226	-2.82627	-2.85385	-3.60017	-6.02017	-2.29863	-17.6096	-22.3614	-18.0455	-14.9358	-21.2519	-20.4023
276	0.006294	-0.05312	0.082421	-0.05504	-0.10213	-0.1717	-0.34738	-0.31591	-0.21376	-0.29905	-0.49663	-0.45945	276	0.315679	-2.66426	4.13387	-2.76056	-5.12239	-8.61171	-17.423	-15.8446	-10.7213	-14.999	-24.9088	-23.044
275	-0.01795	-0.04923	0.007668	-0.0536	-0.05878	-0.12604	-0.34301	-0.43831	-0.45025	-0.29907	-0.25496	-0.19988	275	-0.900292	-2.46916	0.384593	-2.68834	-2.94814	-6.32161	-17.2039	-21.9837	-22.5825	-15	-12.7877	-10.0251
274	-0.01359	-0.01023	-0.00399	-0.05839	0.021208	0.05163	-0.33779	-0.2826	-0.42383	-0.29421	-0.23035	-0.45057	274	-0.681614	-0.513091	-0.200121	-2.92858	1.0637	2.58953	-16.942	-14.174	-21.2574	-14.7563	-11.5533	-22.5986
273	-0.00853	0.051377	0.076695	-0.04206	0.012652	-0.00276	-0.33106	-0.23043	-0.31803	-0.30143	-0.46026	-0.28367	273	-0.427827	2.57684	3.84668	-2.10954	0.634568	-0.138429	-16.6045	-11.5573	-15.951	-15.1184	-23.0846	-14.2276
272	-0.01918	-0.05029	0.019341	-0.03169	-0.06667	0.003178	-0.33168	-0.45711	-0.13222	-0.29584	-0.28096	-0.48724	272	-0.961984	-2.52232	0.970059	-1.58943	-3.34387	0.159394	-16.6356	-22.9266	-6.63157	-14.838	-14.0917	-24.4378
271	-0.01837	-0.04702	-0.06098	-0.07113	-0.06942	-0.07586	-0.32722	-0.29127	-0.39356	-0.29419	-0.15307	-0.25543	271	-0.921358	-2.35831	-3.05849	-3.56756	-3.4818	-3.8048	-16.4119	-14.6088	-19.7392	-14.7553	-7.67731	-12.8112
270	-0.01684	-0.07192	-0.03702	-0.05729	-0.02326	-0.07062	-0.32469	-0.2602	-0.21199	-0.28882	-0.1031	-0.22015	270	-0.84462	-3.60719	-1.85676	-2.87341	-1.16662	-3.54199	-16.285	-13.0505	-10.6325	-14.4859	-5.17104	-11.0417
269	-0.05747	-0.01081	-0.07941	-0.05107	-0.08295	-0.14795	-0.32226	-0.19169	-0.25207	-0.28459	-0.46316	-0.44541	269	-2.88244	-0.542182	-3.98285	-2.56144	-4.1604	-7.42051	-16.1631	-9.61432	-12.6427	-14.2738	-23.23	-22.3398
268	-0.04904	0.031502	-0.01417	-0.04335	-0.00725	0.075499	-0.31495	-0.27941	-0.15708	-0.27808	-0.17878	-0.09006	268	-2.45963	1.58	-0.710704	-2.17424	-0.363628	3.78669	-15.7965	-14.014	-7.87843	-13.9473	-8.96681	-4.51701
267	0.006649	-0.04338	-0.05423	-0.06023	-0.08166	0.085892	-0.30459	-0.33091	-0.28093	-0.27755	-0.24514	-0.30806	267	0.333484	-2.17575	-2.71994	-3.02087	-4.0957	4.30796	-15.2769	-16.597	-14.0902	-13.9207	-12.2951	-15.4509
266	0.008246	0.080465	0.003119	-0.03825	0.0043	0.104869	-0.29489	-0.10747	-0.43588	-0.26934	-0.34093	-0.18265	266	0.413583	4.03577	0.156435	-1.91845	0.215669	5.25976	-14.7904	-5.39022	-21.8618	-13.5089	-17.0995	-9.16091
265	-0.02744	0.053124	0.05931	-0.06966	-0.12176	0.011863	-0.28595	-0.32654	-0.14053	-0.27613	-0.41764	-0.08296	265	-1.37627	2.66446	2.97473	-3.49384	-6.10694	0.594995	-14.342	-16.3778	-7.04836	-13.8495	-20.947	-4.1609
264	-0.03697	-0.02337	0.017715	-0.07903	-0.08857	-0.07561	-0.28008	-0.21741	-0.42363	-0.27779	-0.46264	-0.27012	264	-1.85425	-1.17214	0.888506	-3.96379	-4.44228	-3.79226	-14.0476	-10.9043	-21.2474	-13.9327	-23.204	-13.548
263	-0.00736	0.020543	-0.07602	-0.06787	-0.08231	0.080102	-0.27698	-0.07872	-0.18326	-0.27779	-0.12659	-0.4614	263	-0.369145	1.03035	-3.81283	-3.40406	-4.1283	4.01756	-13.8921	-3.94825	-9.19151	-13.9327	-6.34919	-23.1418
262	0.010376	-0.01256	0.00541	-0.08499	-0.12101	-0.23693	-0.27351	-0.39995	-0.35044	-0.276	-0.13493	-0.23612	262	0.520414	-0.629954	0.271342	-4.26272	-6.06932	-11.8834	-13.718	-20.0597	-17.5765	-13.8429	-6.76749	-11.8427
261	-0.01874	0.020511	-0.00406	-0.05097	-0.0606	0.096014	-0.27085	-0.14286	-0.26434	-0.27718	-0.35421	-0.36532	261	-0.939915	1.02874	-0.203632	-2.55643	-3.03943	4.81564	-13.5846	-7.16522	-13.2581	-13.9021	-17.7656	-18.3228
260	-0.03423	0.021287	-0.09343	-0.05711	-0.05822	-0.17494	-0.27087	-0.31161	-0.15317	-0.28006	-0.19751	-0.14556	260	-1.71682	1.06766	-4.68603	-2.86438	-2.92006	-8.77421	-13.5856	-15.629	-7.68233	-14.0466	-9.90622	-7.30064
259	0.024646	0.057943	0.080296	-0.10384	-0.01169	-0.16355	-0.26457	-0.13515	-0.12337	-0.27939	-0.18953	-0.32104	259	1.23613	2.90616	4.02729	-5.20815	-0.586318	-8.20294	-13.2697	-6.77852	-6.18769	-14.013	-9.50598	-16.1019
258	0.0363	0.033347	0.025162	-0.07141	-0.13785	0.070766	-0.2587	-0.34071	-0.3712	-0.28683	-0.30063	-0.21303	258	1.82065	1.67254	1.26201	-3.58161	-6.91394	3.54931	-12.9752	-17.0885	-18.6177	-14.3861	-15.0783	-10.6846
257	0.012766	-0.0693	0.029848	-0.05988	0.006145	-0.16638	-0.25806	-0.40471	-0.21961	-0.29218	-0.43246	-0.2249	257	0.640286	-3.47578	1.49704	-3.00331	0.308206	-8.34488	-12.9431	-20.2985	-11.0147	-14.6545	-21.6903	-11.28
256	-0.00198	-0.00769	-0.05517	-0.04484	-0.03212	0.095013	-0.25602	-0.20368	-0.35086	-0.29658	-0.34769	-0.09685	256	-0.099308	-0.385696	-2.76708	-2.24898	-1.611	4.76543	-12.8408	-10.2157	-17.5976	-14.8751	-17.4386	-4.85757
255	-0.00739	-0.09482	0.002334	-0.0753	-0.07098	-0.16561	-0.25491	-0.22064	-0.18779	-0.30316	-0.26542	-0.23645	255	-0.37065	-4.75575	0.117063	-3.77671	-3.56004	-8.30626	-12.7852	-11.0663	-9.41871	-15.2052	-13.3123	-11.8593
254	0.039764	0.111792	0.03882	-0.06674	-0.14186	0.040527	-0.25304	-0.41316	-0.24349	-0.30935	-0.37495	-0.22665	254	1.99439	5.60699	1.94704	-3.34738	-7.11507	2.03265	-12.6914	-20.7223	-12.2124	-15.5156	-18.8058	-11.3678
253	0.037561	-0.04172	0.050301	-0.04472	-0.14197	-0.17196	-0.24902	-0.18119	-0.30496	-0.30721	-0.314	-0.45579	253	1.88389	-2.09249	2.52287	-2.24296	-7.12058	-8.62475	-12.4897	-9.08769	-15.2954	-15.4083	-15.7488	-22.8604
252	-0.01529	-0.06928	0.081982	-0.03843	-0.11427	0.159547	-0.25275	-0.11213	-0.07433	-0.31151	-0.2206	-0.3741	252	-0.766878	-3.47478	4.11185	-1.92748	-5.73128	8.00217	-12.6768	-5.62394	-3.72806	-15.624	-11.0643	-18.7632
251	-0.02048	-0.03938	-0.01912	-0.07489	-0.02754	-0.12789	-0.25631	-0.34232	-0.13186	-0.32343	-0.33936	-0.34746	251	-1.02719	-1.97513	-0.958974	-3.75615	-1.38128	-6.41439	-12.8554	-17.1692	-6.61351	-16.2218	-17.0208	-17.427
250	-0.01198	0.01509	-0.01564	-0.0295	0.039022	-0.08304	-0.26087	-0.42238	-0.25604	-0.33433	-0.2603	-0.47225	250	-0.600864	0.756847	-0.784433	-1.47959	1.95717	-4.16492	-13.0841	-21.1847	-12.8418	-16.7685	-13.0555	-23.686
249	0.042593	-0.02436	0.041696	-0.05002	0.044456	-0.07852	-0.2565	-0.06322	-0.08787	-0.34454	-0.5372	-0.25778	249	2.13628	-1.22179	2.09129	-2.50878	2.22972	-3.93821	-12.8649	-3.17083	-4.40717	-17.2806	-26.9436	-12.9291
248	0.021062	0.056672	0.038569	-0.10189	-0.12259	-0.16138	-0.25493	-0.32127	-0.37675	-0.35694	-0.46328	-0.36406	248	1.05638	2.84242	1.93445	-5.11035	-6.14857	-8.0941	-12.7862	-16.1135	-18.8961	-17.9025	-23.2361	-18.2596
247	-0.03082	-0.10925	0.064012	-0.07636	-0.01105	-0.0012	-0.26194	-0.35306	-0.31534	-0.37422	-0.45397	-0.22838	247	-1.54579	-5.47949	3.21056	-3.82988	-0.554219	-0.0601867	-13.1377	-17.7079	-15.8161	-18.7692	-22.7691	-11.4545
246	-0.01658	-0.11078	0.061504	-0.03886	0.050474	0.02391	-0.27016	-0.16951	-0.20779	-0.38541	-0.39911	-0.21882	246	-0.831579	-5.55623	3.08477	-1.94904	2.53155	1.19922	-13.55	-8.50187	-10.4218	-19.3305	-20.0176	-10.975
245	-0.02901	-0.05448	0.003736	-0.04653	-0.12957	-0.23429	-0.28123	-0.11272	-0.13538	-0.40294	-0.55438	-0.57048	245	-1.45501	-2.73247	0.187381	-2.33374	-6.49866	-11.7509	-14.1052	-5.65353	-6.79006	-20.2097	-27.8052	-28.6127
244	-0.05899	-0.00571	-0.05772	-0.04809	-0.00102	-0.22208	-0.2934	-0.43613	-0.43234	-0.42745	-0.48449	-0.22996	244	-2.95868	-0.286388	-2.89498	-2.41198	-0.0511587	-11.1385	-14.7156	-21.8743	-21.6843	-21.439	-24.2999	-11.5338
243	-0.05218	-0.12991	-0.00785	-0.10708	-0.14699	-0.29721	-0.30793	-0.18818	-0.42348	-0.44564	-0.34923	-0.59743	243	-2.61712	-6.51571	-0.393721	-5.37066	-7.37237	-14.9067	-15.4444	-9.43827	-21.2399	-22.3513	-17.5158	-29.9644
242	-0.02849	0.031089	-0.10719	-0.10774	-0.12853	0.072263	-0.33655	-0.15096	-0.21895	-0.4834	-0.6363	-0.57044	242	-1.42893	1.55929	-5.37617	-5.40376	-6.44649	3.62439	-16.8799	-7.57148	-10.9816	-24.2452	-31.914	-28.6107
241	-0.03724	0.004098	-0.0157	-0.07596	-0.07365	-0.17496	-0.35991	-0.31573	-0.29924	-0.52241	-0.57519	-0.63953	241	-1.86779	0.205537	-0.787442	-3.80982	-3.69396	-8.77522	-18.0515	-15.8356	-15.0085	-26.2018	-28.849	-32.076
240	-0.03951	-0.07286	-0.10515	-0.06331	-0.03517	-0.04424	-0.37652	-0.33384	-0.25815	-0.56099	-0.45405	-0.66392	240	-1.98165	-3.65433	-5.27386	-3.17535	-1.76397	-2.21888	-18.8846	-16.7439	-12.9477	-28.1368	-22.7731	-33.2993
239	-0.02294	0.007847	-0.12103	-0.08432	-0.02065	-0.0077	-0.40551	-0.37047	-0.54911	-0.59692	-0.73686	-0.4592	239	-1.15057	0.393571	-6.07033	-4.22912	-1.03571	-0.386198	-20.3386	-18.5811	-27.5409	-29.9389	-36.9576	-23.0314
238	-0.02796	0.009835	-0.10513	-0.11227	-0.05718	-0.15174	-0.44519	-0.49346	-0.48162	-0.65465	-0.62851	-0.61059	238	-1.40235	0.49328	-5.27285	-5.63096	-2.86789	-7.6106	-22.3288	-24.7498	-24.1559	-32.8343	-31.5233	-30.6245
237	-0.04122	-0.09471	-0.07634	-0.09626	-0.12193	-0.28731	-0.47785	-0.56149	-0.66284	-0.69252	-0.84508	-0.57417	237	-2.06741	-4.75023	-3.82888	-4.82797	-6.11547	-14.4102	-23.9668	-28.1618	-33.2451	-34.7337	-42.3855	-28.7978
236	-0.02178	-0.10782	-0.08193	-0.09436	-0.1543	-0.12149	-0.51519	-0.42469	-0.50352	-0.74773	-0.5508	-0.84737	236	-1.09239	-5.40777	-4.10924	-4.73268	-7.739	-6.0934	-25.8396	-21.3006	-25.2543	-37.5028	-27.6257	-42.5003
235	-0.02744	-0.01208	-0.05815	-0.11901	-0.21595	-0.06305	-0.56163	-0.52561	-0.52077	-0.81875	-0.75428	-0.66316	235	-1.37627	-0.605879	-2.91655	-5.96901	-10.8311	-3.16231	-28.1689	-26.3623	-26.1195	-41.0649	-37.8313	-33.2612
234	-0.08617	-0.18256	-0.12491	-0.17857	-0.24049	-0.28698	-0.61265	-0.7988	-0.67033	-0.87101	-0.8372	-0.9979	234	-4.3219	-9.1564	-6.26493	-8.95628	-12.0619	-14.3936	-30.7278	-40.0643	-33.6208	-43.686	-41.9902	-50.0502
233	-0.0729	-0.15963	-0.06506	-0.1361	-0.05806	0.003274	-0.65008	-0.79994	-0.5835	-0.9353	-0.81636	-1.13131	233	-3.65634	-8.00633	-3.26312	-6.82617	-2.91203	0.164209	-32.6051	-40.1214	-29.2658	-46.9105	-40.945	-56.7415
232	-0.05689	-0.0199	-0.0634	-0.16895	-0.17841	-0.33138	-0.6978	-0.58041	-0.79821	-1.0154	-0.97855	-1.0182	232	-2.85335	-0.998096	-3.17986	-8.47378	-8.94825	-16.6205	-34.9985	-29.1108	-40.0347	-50.928	-49.0797	-51.0684
231	-0.0674	0.022307	0.017693	-0.14103	-0.17525	-0.16074	-0.74002	-0.9201	-0.86221	-1.07978	-1.22489	-1.26479	231	-3.38048	1.11882	0.887402	-7.07344	-8.78976	-8.062	-37.1161	-46.1481	-43.2446	-54.157	-61.435	-63.4362
230	-0.0799	-0.16256	-0.13848	-0.12526	-0.09392	-0.06468	-0.77833	-0.60448	-0.87331	-1.13702	-1.24789	-0.97156	230	-4.00743	-8.15329	-6.94554	-6.28248	-4.71061	-3.24406	-39.0376	-30.318	-43.8013	-57.0279	-62.5886	-48.7291
229	-0.11879	-0.20765	-0.10197	-0.0992	-0.04145	-0.1742	-0.82319	-0.71427	-0.79835	-1.20148	-1.10135	-1.2792	229	-5.95798	-10.4148	-5.11436	-4.97543	-2.07895	-8.7371	-41.2876	-35.8246	-40.0417	-60.2609	-55.2388	-64.159
228	-0.08561	-0.062	-0.04367	-0.13311	-0.09625	0.056763	-0.85106	-0.79805	-0.85144	-1.24018	-1.06422	-1.43714	228	-4.29382	-3.10964	-2.19029	-6.67621	-4.82747	2.84698	-42.6854	-40.0266	-42.7044	-62.2019	-53.3765	-72.0806
227	-0.06562	-0.04962	-0.0859	-0.11508	-0.08997	0.017076	-0.87821	-0.82212	-1.02895	-1.27763	-1.13844	-1.40876	227	-3.29121	-2.48872	-4.30836	-5.7719	-4.5125	0.856456	-44.0471	-41.2339	-51.6076	-64.0802	-57.0991	-70.6571
226	-0.09918	-0.06893	-0.05411	-0.10759	-0.12893	-0.22699	-0.92448	-0.91273	-0.98025	-1.3131	-1.33443	-1.20675	226	-4.97443	-3.45722	-2.71392	-5.39624	-6.46656	-11.3848	-46.3678	-45.7785	-49.165	-65.8593	-66.9291	-60.5252
225	-0.08933	-0.01214	-0.12102	-0.0902	-0.01792	-0.27898	-0.95104	-0.81573	-0.94011	-1.34571	-1.20891	-1.43357	225	-4.4804	-0.608888	-6.06983	-4.52403	-0.898788	-13.9924	-47.6999	-40.9134	-47.1517	-67.4948	-60.6336	-71.9015
224	-0.11215	-0.05528	-0.02187	-0.08711	-0.14632	-0.17626	-0.96895	-0.92731	-0.98512	-1.36527	-1.50821	-1.40291	224	-5.62495	-2.7726	-1.0969	-4.36905	-7.33876	-8.84042	-48.5982	-46.5097	-49.4092	-68.4759	-75.6451	-70.3637
223	-0.0967	-0.00572	-0.0609	-0.09571	-0.10135	-0.18627	-0.99395	-0.88021	-1.18842	-1.38768	-1.2069	-1.40197	223	-4.85004	-0.28689	-3.05447	-4.80039	-5.08327	-9.34248	-49.8521	-44.1474	-59.6059	-69.5999	-60.5327	-70.3166
222	-0.11652	-0.16436	-0.05451	-0.14787	-0.14246	-0.05974	-1.00824	-1.06172	-1.10018	-1.41281	-1.43551	-1.42864	222	-5.84413	-8.24357	-2.73398	-7.4165	-7.14516	-2.99629	-50.5688	-53.2512	-55.1801	-70.8603	-71.9988	-71.6542
221	-0.18492	-0.13958	-0.12928	-0.17198	-0.09029	-0.23279	-1.01283	-0.83421	-1.06159	-1.43179	-1.46979	-1.27356	221	-9.27477	-7.00071	-6.48411	-8.62575	-4.52855	-11.6757	-50.7991	-41.8403	-53.2446	-71.8122	-73.7181	-63.8761
220	-0.19004	-0.09593	-0.24295	-0.11795	-0.06735	-0.31022	-1.01188	-0.93117	-1.04696	-1.44841	-1.46005	-1.31753	220	-9.53156	-4.81142	-12.1853	-5.91585	-3.37798	-15.5593	-50.7514	-46.7033	-52.5109	-72.6458	-73.2296	-66.0814
219	-0.16087	-0.16439	-0.12836	-0.0405	-0.08869	0.071855	-1.00925	-1.04732	-1.03388	-1.45479	-1.44863	-1.61356	219	-8.06852	-8.24507	-6.43797	-2.0313	-4.4483	3.60393	-50.6195	-52.5289	-51.8548	-72.9658	-72.6568	-80.929
218	-0.13334	-0.15347	-0.11829	-0.06382	-0.07882	-0.05506	-1.02398	-1.17604	-1.00736	-1.44836	-1.31706	-1.39088	218	-6.68774	-7.69737	-5.9329	-3.20093	-3.95326	-2.76156	-51.3583	-58.9849	-50.5247	-72.6433	-66.0579	-69.7604
217	-0.10475	-0.13574	-0.03103	-0.16782	-0.12454	-0.14512	-1.01904	-0.99655	-0.92648	-1.42159	-1.40232	-1.3116	217	-5.25379	-6.80812	-1.55633	-8.41711	-6.24637	-7.27857	-51.1105	-49.9825	-46.4681	-71.3006	-70.3341	-65.784
216	-0.09954	-0.11582	-0.18362	-0.12324	-0.10973	-0.15187	-0.9913	-1.04848	-0.9319	-1.41221	-1.39201	-1.54864	216	-4.99248	-5.80902	-9.20956	-6.18117	-5.50357	-7.61712	-49.7192	-52.5871	-46.74	-70.8302	-69.817	-77.6729
215	-0.14782	-0.07273	-0.10206	-0.06839	-0.12285	-0.16352	-0.96764	-0.78605	-1.08741	-1.37164	-1.29742	-1.56909	215	-7.41399	-3.64781	-5.11888	-3.43014	-6.16161	-8.20144	-48.5325	-39.4248	-54.5397	-68.7954	-65.0728	-78.6986
214	-0.13789	-0.21266	-0.19489	-0.05771	-0.03393	0.031881	-0.96244	-0.88305	-0.9918	-1.33946	-1.49462	-1.14086	214	-6.91595	-10.6661	-9.77482	-2.89448	-1.70178	1.59901	-48.2717	-44.2899	-49.7443	-67.1814	-74.9635	-57.2205
213	-0.18024	-0.10774	-0.19002	-0.00799	-0.09878	0.108634	-0.95844	-0.7603	-1.12397	-1.2901	-1.46497	-1.39879	213	-9.04004	-5.40376	-9.53056	-0.400743	-4.95437	5.4486	-48.0711	-38.1333	-56.3733	-64.7057	-73.4764	-70.1571
212	-0.21719	-0.22131	-0.15914	-0.06122	-0.00112	-0.24463	-0.93935	-1.08129	-1.06705	-1.26355	-1.25731	-1.30757	212	-10.8933	-11.0999	-7.98176	-3.07052	-0.0561742	-12.2696	-47.1136	-54.2327	-53.5185	-63.3741	-63.0611	-65.5819
211	-0.18054	-0.09308	-0.26722	-0.04938	0.040984	-0.13542	-0.90567	-0.89213	-1.04642	-1.21057	-1.31317	-1.06871	211	-9.05508	-4.66848	-13.4026	-2.47668	2.05558	-6.79207	-45.4244	-44.7453	-52.4838	-60.7168	-65.8628	-53.6017
210	-0.16238	-0.09848	-0.22147	-0.0134	0.009521	0.046663	-0.87621	-1.01372	-0.91877	-1.15832	-1.03117	-1.25513	210	-8.14426	-4.93932	-11.108	-0.672084	0.477531	2.34041	-43.9468	-50.8437	-46.0814	-58.0962	-51.7189	-62.9517
209	-0.15986	-0.20895	-0.20473	-0.02163	0.057879	0.066496	-0.85911	-1.02658	-0.99021	-1.09259	-0.91747	-0.98513	209	-8.01787	-10.48	-10.2683	-1.08486	2.90295	3.33514	-43.0891	-51.4887	-49.6645	-54.7995	-46.0162	-49.4097
208	-0.12826	-0.04759	-0.11535	0.031515	0.086847	-0.1076	-0.82698	-0.87196	-0.71127	-0.98982	-0.8612	-1.11465	208	-6.43295	-2.3869	-5.78544	1.58065	4.35586	-5.39674	-41.4776	-43.7336	-35.6741	-49.645	-43.194	-55.9059
207	-0.15284	-0.05795	-0.08821	0.002247	-0.0737	0.129808	-0.74983	-0.94347	-0.90829	-0.86779	-1.05705	-0.84807	207	-7.66578	-2.90651	-4.42422	0.1127	-3.69646	6.51059	-37.6081	-47.3203	-45.5558	-43.5245	-53.0169	-42.5354
206	-0.16552	-0.2276	-0.20582	0.043748	0.033311	0.157878	-0.67342	-0.52095	-0.50866	-0.70163	-0.67524	-0.7029	206	-8.30175	-11.4154	-10.323	2.19421	1.67073	7.91846	-33.7758	-26.1285	-25.5121	-35.1906	-33.867	-35.2543
205	-0.24962	-0.17471	-0.32579	0.14282	0.160677	0.02415	-0.6014	-0.55583	-0.66756	-0.57842	-0.71059	-0.63284	205	-12.5198	-8.76268	-16.3402	7.16322	8.05884	1.21126	-30.1636	-27.878	-33.4818	-29.011	-35.64	-31.7404
204	-0.23904	-0.17564	-0.28586	0.14789	0.09964	0.157421	-0.49682	-0.63803	-0.35648	-0.39616	-0.51185	-0.50253	204	-11.9892	-8.80932	-14.3375	7.41751	4.9975	7.89554	-24.9183	-32.0007	-17.8795	-19.8696	-25.6721	-25.2047
203	-0.29407	-0.31006	-0.36732	0.1014	0.086656	-0.08451	-0.38414	-0.28836	-0.20374	-0.22867	-0.03315	-0.07751	203	-14.7492	-15.5512	-18.4231	5.08577	4.34628	-4.23865	-19.2668	-14.4629	-10.2187	-11.4691	-1.66266	-3.88756
202	-0.26316	-0.18089	-0.27941	0.029087	-0.05423	-0.09563	-0.24875	-0.18234	-0.12628	-0.0684	0.054948	0.047213	202	-13.1989	-9.07264	-14.014	1.45887	-2.71994	-4.79638	-12.4762	-9.14536	-6.33364	-3.43064	2.75595	2.36799
201	-0.38999	-0.39947	-0.32797	0.029093	0.070985	0.074079	-0.07263	0.096485	-0.05534	0.100747	-0.07114	0.051199	201	-19.5602	-20.0356	-16.4495	1.45918	3.56029	3.71547	-3.6428	4.83926	-2.77561	5.05302	-3.56807	2.56791
200	-0.36443	-0.42115	-0.3721	0.091124	0.001412	0.174357	0.028384	-0.01764	0.021116	0.208227	0.172502	0.248247	200	-18.2782	-21.123	-18.6629	4.57037	0.0708196	8.74497	1.42362	-0.884744	1.05908	10.4437	8.65193	12.451
199	-0.32155	-0.3301	-0.25137	0.110825	0.124402	0.19822	0.199485	0.207257	0.338858	0.328159	0.416276	0.255184	199	-16.1275	-16.5563	-12.6076	5.55849	6.23945	9.94183	10.0053	10.3951	16.9956	16.459	20.8786	12.7989
198	-0.2936	-0.21549	-0.2381	0.094491	0.042658	0.218143	0.194971	0.112389	0.333473	0.332237	0.461629	0.448963	198	-14.7257	-10.808	-11.942	4.73925	2.13954	10.9411	9.77888	5.63693	16.7255	16.6635	23.1533	22.518
197	-0.11887	-0.0531	-0.18299	-0.08231	-0.03411	-0.1755	0.295345	0.458269	0.297312	0.336491	0.4505	0.505906	197	-5.96199	-2.66326	-9.17797	-4.1283	-1.71081	-8.8023	14.8132	22.9847	14.9118	16.8769	22.5951	25.374
196	-0.09765	-0.09531	-0.09539	0.165876	0.228397	0.230834	0.207435	0.197629	0.293655	0.260039	0.267652	0.076541	196	-4.89769	-4.78033	-4.78434	8.3196	11.4554	11.5776	10.404	9.91219	14.7284	13.0424	13.4242	3.83896
195	-0.02109	0.058728	0.032482	0.260853	0.312234	0.070111	0.1578	-0.03355	0.213787	0.312991	0.261685	0.417796	195	-1.05778	2.94554	1.62915	13.0832	15.6603	3.51646	7.91455	-1.68272	10.7226	15.6982	13.125	20.9548
194	0.734057	0.706324	0.703822	-0.60369	-0.67153	-0.47849	0.208568	0.404005	0.234311	0.135337	0.273715	0.020559	194	36.817	35.4261	35.3006	-30.2784	-33.681	-23.9989	10.4608	20.2631	11.752	6.7879	13.7283	1.03115
193	0.219258	0.141607	0.270698	-0.28734	-0.24689	-0.18984	0.216326	0.363173	0.230326	0.078822	0.004048	0.105847	193	10.997	7.10238	13.577	-14.4117	-12.3829	-9.52153	10.85	18.2151	11.5521	3.95336	0.20303	5.30882
192	0.259399	0.308177	0.175142	0.086528	0.113577	-0.10923	0.110498	0.189857	0.123797	0.025351	0.056108	-0.09516	192	13.0103	15.4568	8.78434	4.33986	5.69652	-5.47849	5.54209	9.52238	6.20911	1.27149	2.81413	-4.7728
191	0.170952	0.218445	0.183275	-0.11097	-0.13941	-0.0009	-0.03475	-0.18272	-0.15409	0.141265	0.287449	0.045605	191	8.57419	10.9562	9.19226	-5.56576	-6.99219	-0.04514	-1.74291	-9.16442	-7.72847	7.08522	14.4172	2.28734
190	0.002844	-0.06109	-0.07771	0.357933	0.374111	0.517641	0.049601	0.064769	-0.02602	-0.03085	0.070237	-0.07665	190	0.142642	-3.064	-3.89759	17.9523	18.7637	25.9626	2.48777	3.24853	-1.30505	-1.5473	3.52278	-3.84442

## Sheet: 2D
Without Irradiation																					With Irradiation
Raw CD(mdeg)										Molar Elipticity											Raw CD(mdeg)										Molar Elipticity
	Aβ42			Aβ42 + 1			Aβ42 + 2				Aβ42			Aβ42 + 1			Aβ42 + 2					Aβ42			Aβ42 + 1			Aβ42 + 2				Aβ42			Aβ42 + 1			Aβ42 + 2
Wavelength	Set 1	Set 2	Set 3	Set 1	Set 2	Set 3	Set 1	Set 2	Set 3	Wavelength	Set 1	Set 2	Set 3	Set 1	Set 2	Set 3	Set 1	Set 2	Set 3		Wavelength	Set 1	Set 2	Set 3	Set 1	Set 2	Set 3	Set 1	Set 2	Set 3	Wavelength	Set 1	Set 2	Set 3	Set 1	Set 2	Set 3	Set 1	Set 2	Set 3
300	-0.2325	-0.2454	-0.5235	-0.02073	0.1373	0.18671	-0.000697059	-0.149412	0.0452294	300	-11.6612	-12.3082	-26.2564	-1.03972	6.88636	9.36454	-0.0349614	-7.49386	2.2685		300	-0.2325	-0.2454	-0.5235	0.012202	-0.11499	-0.88049	-0.01846	0.074579	0.493406	300	-11.6612	-12.3082	-26.2564	0.611998	-5.76739	-44.1615	-0.925872	3.74055	24.7471
299	-0.00461	-0.18956	0.283045	0.146599	-0.09235	0.40171	-0.0348234	-0.285409	0.0880997	299	-0.231217	-9.50749	14.1963	7.35275	-4.63187	20.148	-1.74659	-14.3149	4.41869		299	-0.00461	-0.18956	0.283045	0.084732	-0.07672	-0.89271	0.099585	0.182528	0.587917	299	-0.231217	-9.50749	14.1963	4.24978	-3.84793	-44.7744	4.99474	9.15479	29.4873
298	0.105569	-0.04613	0.306066	0.166401	0.226933	0.336069	-0.0665566	-0.0741894	0.0947105	298	5.29487	-2.31368	15.3509	8.34593	11.382	16.8557	-3.33818	-3.72101	4.75026		298	0.105569	-0.04613	0.306066	-0.03677	-0.18017	0.563562	-0.01654	0.018204	-0.28247	298	5.29487	-2.31368	15.3509	-1.84422	-9.03653	28.2658	-0.829573	0.913032	-14.1674
297	0.026931	0.187209	0.298903	-0.16192	0.019424	-0.4222	-0.0678596	-0.165033	-0.131731	297	1.35074	9.38957	14.9916	-8.12119	0.974222	-21.1757	-3.40354	-8.27731	-6.60706		297	0.026931	0.187209	0.298903	-0.01939	-0.06102	-0.83381	0.018995	0.159469	-0.0578	297	1.35074	9.38957	14.9916	-0.972516	-3.06049	-41.8202	0.952705	7.99826	-2.89899
296	-0.00874	0.087927	0.24744	-0.22672	-0.36011	-0.25647	-0.226336	-0.401213	-0.104055	296	-0.43836	4.41003	12.4105	-11.3713	-18.0615	-12.8634	-11.352	-20.123	-5.21893		296	-0.00874	0.087927	0.24744	0.165692	0.126422	0.624551	0.160766	0.04758	1.06476	296	-0.43836	4.41003	12.4105	8.31037	6.34077	31.3247	8.06331	2.3864	53.4038
295	0.071305	-0.03544	0.098046	-0.00799	-0.15286	-0.06343	-0.104772	-0.148044	-0.19577	295	3.57634	-1.77751	4.91755	-0.400743	-7.66678	-3.18137	-5.2549	-7.42521	-9.81896		295	0.071305	-0.03544	0.098046	0.013033	-0.06868	0.791028	0.088467	-0.07953	-0.12996	295	3.57634	-1.77751	4.91755	0.653677	-3.44468	39.6744	4.43711	-3.98887	-6.51822
294	-0.12359	0.006134	-0.39715	0.028628	-0.20387	0.206549	-0.0459838	-0.0749399	-0.0474097	294	-6.19873	0.307654	-19.9193	1.43585	-10.2252	10.3596	-2.30634	-3.75865	-2.37786		294	-0.12359	0.006134	-0.39715	-0.04863	-0.17849	-0.13157	-0.07748	-0.15843	-0.80039	294	-6.19873	0.307654	-19.9193	-2.43906	-8.95227	-6.59897	-3.88605	-7.94614	-40.144
293	-0.11523	0.029798	-0.14032	-0.05422	-0.33515	-0.40976	-0.0126722	0.216671	-0.153294	293	-5.77942	1.49454	-7.03783	-2.71943	-16.8096	-20.5517	-0.635581	10.8672	-7.68853		293	-0.11523	0.029798	-0.14032	0.147657	0.193982	0.289566	0.098769	0.288353	-0.08663	293	-5.77942	1.49454	-7.03783	7.40582	9.72927	14.5233	4.95381	14.4625	-4.34498
292	-0.08235	-0.13838	0.007547	-0.13246	-0.3064	-0.29302	0.00801806	-0.0308153	-0.0255037	292	-4.13031	-6.94053	0.378524	-6.6436	-15.3677	-14.6966	0.40215	-1.54556	-1.27915		292	-0.08235	-0.13838	0.007547	0.183463	0.226057	0.182365	0.1797	0.44613	0.788985	292	-4.13031	-6.94053	0.378524	9.20169	11.338	9.14662	9.01295	22.3759	39.572
291	-0.10503	-0.04097	-0.15112	0.036988	-0.04179	-0.0246	0.174937	0.43957	0.341206	291	-5.26784	-2.05487	-7.57951	1.85515	-2.096	-1.23383	8.77406	22.0469	17.1134		291	-0.10503	-0.04097	-0.15112	0.007045	-0.09355	0.053051	0.075818	-0.01347	0.887383	291	-5.26784	-2.05487	-7.57951	0.353346	-4.69205	2.6608	3.80269	-0.675595	44.5072
290	-0.00719	0.185949	0.077325	0.057692	0.14447	-0.12423	0.143318	0.287029	0.247355	290	-0.360618	9.32638	3.87828	2.89357	7.24597	-6.23082	7.18819	14.3961	12.4062		290	-0.00719	0.185949	0.077325	0.042364	-0.12054	-0.43631	0.05513	0.102274	0.785341	290	-0.360618	9.32638	3.87828	2.12479	-6.04575	-21.8834	2.76508	5.12961	39.3892
289	0.055779	-0.07238	-0.11328	-0.11679	0.092382	0.183617	-0.158709	-0.3374	0.0398341	289	2.79763	-3.63026	-5.68162	-5.85767	4.63347	9.20941	-7.96014	-16.9225	1.9979		289	0.055779	-0.07238	-0.11328	-0.0028	0.174328	-0.81968	-0.046	-0.07264	0.113613	289	2.79763	-3.63026	-5.68162	-0.140436	8.74352	-41.1115	-2.30716	-3.6433	5.69832
288	-0.01328	-0.10556	-0.14188	-0.01243	0.141059	-0.3197	-0.153969	0.160939	-0.0350416	288	-0.666066	-5.29442	-7.11607	-0.623434	7.07489	-16.0347	-7.7224	8.072	-1.75753		288	-0.01328	-0.10556	-0.14188	-0.01805	-0.20228	0.164418	-0.04114	0.00755	0.350828	288	-0.666066	-5.29442	-7.11607	-0.905308	-10.1455	8.24648	-2.0634	0.378674	17.596
287	-0.05871	-0.00798	0.01223	-0.04789	0.148466	-0.43849	-0.0690902	-0.142738	-0.0740168	287	-2.94463	-0.400241	0.613402	-2.40195	7.44639	-21.9927	-3.46526	-7.15913	-3.71235		287	-0.05871	-0.00798	0.01223	-0.08852	-0.06339	-0.57155	0.015026	0.236465	-0.52219	287	-2.94463	-0.400241	0.613402	-4.43977	-3.17936	-28.6664	0.753637	11.86	-26.1907
286	-0.01822	-0.18409	-0.11891	-0.214	0.02569	-0.42393	-0.244985	-0.0886872	-0.278834	286	-0.913834	-9.23314	-5.964	-10.7333	1.2885	-21.2624	-12.2874	-4.44816	-13.9851		286	-0.01822	-0.18409	-0.11891	0.064503	-0.05373	0.64338	0.07243	0.114893	0.821397	286	-0.913834	-9.23314	-5.964	3.23518	-2.69486	32.2691	3.63277	5.76252	41.1976
285	-0.15316	-0.24159	-0.32703	-0.1671	-0.31925	-0.18388	-0.347513	-0.377337	-0.187013	285	-7.68182	-12.1171	-16.4024	-8.38099	-16.0122	-9.2226	-17.4297	-18.9256	-9.37974		285	-0.15316	-0.24159	-0.32703	0.028929	-0.0008	0.618682	0.027019	0.209689	0.312891	285	-7.68182	-12.1171	-16.4024	1.45095	-0.0401244	31.0303	1.35515	10.5171	15.6932
284	-0.14743	-0.28362	-0.43198	0.160578	-0.00939	0.238713	0.0166879	0.35343	-0.0203712	284	-7.39443	-14.2251	-21.6662	8.05388	-0.470961	11.9728	0.836991	17.7265	-1.02173		284	-0.14743	-0.28362	-0.43198	-0.04546	0.063004	-0.3588	0.026952	-0.25907	0.357272	284	-7.39443	-14.2251	-21.6662	-2.28007	3.16	-17.9958	1.35179	-12.9938	17.9192
283	-0.06901	-0.20304	0.203921	0.070188	-0.22396	0.325585	0.0531797	-0.239151	0.238242	283	-3.46123	-10.1836	10.2278	3.52032	-11.2328	16.3299	2.66726	-11.9947	11.9491		283	-0.06901	-0.20304	0.203921	0.068059	0.057816	0.127798	0.225488	0.321154	0.932382	283	-3.46123	-10.1836	10.2278	3.41354	2.89979	6.40978	11.3095	16.1077	46.7641
282	-0.12656	-0.02699	0.02888	0.124121	0.236773	-0.04075	0.109311	-0.116992	-0.0392845	282	-6.34769	-1.3537	1.44849	6.22536	11.8755	-2.04384	5.48255	-5.86782	-1.97033		282	-0.12656	-0.02699	0.02888	0.037189	0.08724	0.342368	0.161224	0.114005	0.005405	282	-6.34769	-1.3537	1.44849	1.86523	4.37557	17.1717	8.08628	5.71798	0.271091
281	-0.16572	-0.02916	0.064476	0.068341	-0.15623	0.08371	-0.00408596	0.219574	-0.0213429	281	-8.31178	-1.46254	3.23383	3.42768	-7.8358	4.19852	-0.204934	11.0128	-1.07047		281	-0.16572	-0.02916	0.064476	0.076069	0.013122	0.222286	0.080715	0.156428	-0.86166	281	-8.31178	-1.46254	3.23383	3.81528	0.658141	11.1489	4.04831	7.84573	-43.217
280	-0.08826	-0.19657	0.045638	0.085924	0.039926	0.458616	0.0826616	-0.188198	0.0274764	280	-4.42673	-9.85908	2.289	4.30957	2.00251	23.0021	4.14594	-9.43919	1.3781		280	-0.08826	-0.19657	0.045638	0.114287	0.147797	0.908249	0.057023	-0.0886	-0.26219	280	-4.42673	-9.85908	2.289	5.73213	7.41284	45.5537	2.86002	-4.44378	-13.1503
279	0.028055	-0.09807	-0.22847	-0.04872	-0.23261	0.27922	0.0273467	-0.0921003	0.114291	279	1.40711	-4.91876	-11.459	-2.44358	-11.6667	14.0044	1.37159	-4.61934	5.73231		279	0.028055	-0.09807	-0.22847	0.155652	0.11013	0.448448	0.106084	0.297664	0.191682	279	1.40711	-4.91876	-11.459	7.80681	5.52363	22.4922	5.3207	14.9295	9.61392
278	-0.05619	-0.12106	0.050875	-0.14357	0.132572	0.232801	-0.00981265	0.372526	-0.173593	278	-2.81824	-6.07183	2.55166	-7.20083	6.64922	11.6763	-0.492159	18.6843	-8.70666		278	-0.05619	-0.12106	0.050875	0.048791	0.244499	-0.58799	0.079396	0.271649	0.317347	278	-2.81824	-6.07183	2.55166	2.44714	12.263	-29.491	3.98215	13.6247	15.9167
277	-0.16115	-0.21845	-0.40399	0.015319	0.223982	-0.01764	-0.030308	-0.413976	-0.0439694	277	-8.08257	-10.9565	-20.2623	0.768333	11.2339	-0.884744	-1.52011	-20.7632	-2.20531		277	-0.16115	-0.21845	-0.40399	0.050821	-0.01845	0.76349	0.08107	0.141356	0.493498	277	-8.08257	-10.9565	-20.2623	2.54896	-0.92537	38.2933	4.06611	7.08979	24.7517
276	-0.20053	-0.28086	-0.1485	0.004307	0.030134	0.097652	-0.0469101	0.192163	-0.0821611	276	-10.0577	-14.0867	-7.4481	0.21602	1.51139	4.89779	-2.3528	9.63807	-4.12084		276	-0.20053	-0.28086	-0.1485	0.070169	0.183408	-0.04858	0.114521	0.157338	0.813159	276	-10.0577	-14.0867	-7.4481	3.51937	9.19893	-2.43656	5.74386	7.89137	40.7844
275	-0.03996	-0.10855	-0.27568	-0.03113	-0.13219	-0.09314	-0.0391172	0.194436	-0.0145399	275	-2.00422	-5.44439	-13.8269	-1.56134	-6.63006	-4.67149	-1.96194	9.75204	-0.729259		275	-0.03996	-0.10855	-0.27568	0.034326	0.132922	0.580807	0.059137	0.05808	0.598979	275	-2.00422	-5.44439	-13.8269	1.72164	6.66678	29.1307	2.96605	2.91303	30.0421
274	-0.15019	0.041235	0.063827	-0.12205	-0.10657	-0.48588	-0.0120884	-0.115017	-0.107944	274	-7.53286	2.06816	3.20128	-6.12149	-5.34508	-24.3696	-0.6063	-5.76874	-5.41401		274	-0.15019	0.041235	0.063827	0.09457	0.219597	-0.88285	0.113303	0.066174	-0.47804	274	-7.53286	2.06816	3.20128	4.74321	11.014	-44.2798	5.68277	3.31899	-23.9764
273	-0.16703	-0.29564	-0.08369	0.152414	0.259339	0.199235	0.0936818	0.448164	0.0973404	273	-8.37748	-14.828	-4.19752	7.64441	13.0073	9.99274	4.69866	22.4779	4.88216		273	-0.16703	-0.29564	-0.08369	0.120067	0.276334	0.577444	0.110254	-0.01236	-0.85327	273	-8.37748	-14.828	-4.19752	6.02203	13.8597	28.962	5.52985	-0.619923	-42.7962
272	-0.06879	-0.23659	-0.18971	0.148465	0.196306	0.105235	0.0168175	0.237569	-0.0244133	272	-3.4502	-11.8663	-9.51501	7.44634	9.84584	5.27812	0.843491	11.9154	-1.22446		272	-0.06879	-0.23659	-0.18971	0.022589	-0.05022	-0.06197	-0.02442	0.263745	-0.49935	272	-3.4502	-11.8663	-9.51501	1.13296	-2.51881	-3.10814	-1.2248	13.2283	-25.0452
271	-0.07608	-0.02067	0.067408	0.018094	-0.15612	0.333862	0.0955724	0.0228536	-0.0441434	271	-3.81583	-1.03672	3.38089	0.907515	-7.83029	16.745	4.79349	1.14624	-2.21404		271	-0.07608	-0.02067	0.067408	0.048266	0.140554	0.551491	-0.0039	0.194748	0.247665	271	-3.81583	-1.03672	3.38089	2.42081	7.04956	27.6603	-0.195607	9.76769	12.4218
270	-0.13179	0.044294	0.126491	-0.03167	0.126749	-0.01738	0.0288785	0.122823	-0.0174598	270	-6.61	2.22159	6.34423	-1.58843	6.35717	-0.871704	1.44842	6.16024	-0.875704		270	-0.13179	0.044294	0.126491	0.047631	-0.15192	-0.05495	0.039106	0.096016	0.227957	270	-6.61	2.22159	6.34423	2.38896	-7.61963	-2.75605	1.96138	4.81574	11.4333
269	-0.17659	-0.25822	-0.10098	-0.00326	-0.07408	0.393675	0.101292	-0.298003	0.288562	269	-8.85697	-12.9512	-5.06471	-0.163507	-3.71552	19.745	5.08036	-14.9465	14.473		269	-0.17659	-0.25822	-0.10098	0.015883	0.188083	-0.74057	0.0625	-0.08194	0.206062	269	-8.85697	-12.9512	-5.06471	0.796621	9.43341	-37.1437	3.13472	-4.10975	10.3352
268	-0.09144	-0.12772	-0.27765	0.016074	-0.22469	-0.24246	0.0173038	0.0141996	-0.0230079	268	-4.58622	-6.40587	-13.9257	0.8062	-11.2695	-12.1607	0.867882	0.712188	-1.15398		268	-0.09144	-0.12772	-0.27765	-0.08278	0.085256	-0.26258	0.005972	-0.02306	0.737194	268	-4.58622	-6.40587	-13.9257	-4.15188	4.27606	-13.1698	0.299529	-1.15659	36.9744
267	-0.01544	-0.20044	-0.19121	0.00391	-0.26194	0.051647	-0.103702	-0.391042	0.0853892	267	-0.774402	-10.0532	-9.59024	0.196108	-13.1377	2.59038	-5.20123	-19.6129	4.28274		267	-0.01544	-0.20044	-0.19121	-0.00719	0.179635	-0.63863	-0.00342	-0.01666	-0.33149	267	-0.774402	-10.0532	-9.59024	-0.360618	9.00969	-32.0308	-0.171532	-0.835592	-16.6261
266	-0.0294	0.080222	0.051739	0.120869	0.297611	0.106544	0.0370079	0.206092	0.0348178	266	-1.47457	4.02358	2.595	6.06225	14.9268	5.34377	1.85615	10.3367	1.74631		266	-0.0294	0.080222	0.051739	-0.00081	0.026925	0.169366	0.043309	0.142017	0.126127	266	-1.47457	4.02358	2.595	-0.040626	1.35044	8.49465	2.17219	7.12294	6.32597
265	0.058454	0.220403	-0.11102	0.055241	0.124425	0.120176	0.0417426	0.366921	0.145756	265	2.93179	11.0544	-5.56827	2.77064	6.24061	6.02749	2.09362	18.4031	7.31046		265	0.058454	0.220403	-0.11102	0.005866	0.150847	-0.17759	0.042798	0.05784	0.24189	265	2.93179	11.0544	-5.56827	0.294212	7.56582	-8.90713	2.14656	2.901	12.1321
264	0.026734	0.064648	0.180671	-0.04425	0.210411	-0.2242	-0.0880711	-0.236245	-0.0870304	264	1.34086	3.24246	9.06165	-2.21938	10.5533	-11.2449	-4.41725	-11.849	-4.36506		264	0.026734	0.064648	0.180671	0.065305	0.054307	-0.78928	0.018554	0.178456	-0.8517	264	1.34086	3.24246	9.06165	3.27541	2.7238	-39.5868	0.930586	8.95056	-42.7175
263	-0.18962	-0.02003	-0.14669	-0.03563	0.059956	-0.03142	-0.0876822	-0.337192	-0.0599925	263	-9.5105	-1.00462	-7.35732	-1.78704	3.00713	-1.57589	-4.39775	-16.912	-3.00896		263	-0.18962	-0.02003	-0.14669	0.052575	0.030716	0.772482	0.06547	-0.13739	0.954773	263	-9.5105	-1.00462	-7.35732	2.63693	1.54058	38.7443	3.28368	-6.89087	47.8872
262	-0.1679	-0.2684	0.017485	-0.13632	-0.20014	-0.23961	-0.0719694	0.0595597	-0.0197399	262	-8.42112	-13.4618	0.87697	-6.83721	-10.0381	-12.0178	-3.60967	2.98725	-0.990064		262	-0.1679	-0.2684	0.017485	0.11485	0.303098	-0.1909	0.091888	0.002771	0.097238	262	-8.42112	-13.4618	0.87697	5.76037	15.202	-9.5747	4.60869	0.138981	4.87703
261	-0.02719	-0.08707	0.26591	-0.26047	-0.153	0.111595	-0.234285	-0.20815	-0.101346	261	-1.36373	-4.36704	13.3369	-13.064	-7.6738	5.59711	-11.7507	-10.4399	-5.08306		261	-0.02719	-0.08707	0.26591	0.12475	0.237405	-0.36577	0.05866	-0.21965	1.01722	261	-1.36373	-4.36704	13.3369	6.25691	11.9072	-18.3454	2.94212	-11.0167	51.0191
260	-0.19077	-0.13221	0.094273	-0.01094	-0.20887	0.020245	-0.133617	0.0460963	-0.137302	260	-9.56818	-6.63107	4.72831	-0.548702	-10.476	1.0154	-6.70163	2.31198	-6.88646		260	-0.19077	-0.13221	0.094273	0.15439	0.323054	1.03447	0.107697	-0.14388	-0.29862	260	-9.56818	-6.63107	4.72831	7.74352	16.203	51.8844	5.4016	-7.21638	-14.9775
259	-0.16323	-0.23121	-0.31991	-0.18442	0.003038	-0.21068	-0.259166	-0.142103	-0.19503	259	-8.18689	-11.5965	-16.0453	-9.24969	0.152373	-10.5668	-12.9986	-7.12727	-9.78182		259	-0.16323	-0.23121	-0.31991	0.038949	0.049824	-0.91579	-0.01371	-0.05879	-0.37223	259	-8.18689	-11.5965	-16.0453	1.95351	2.49895	-45.932	-0.687633	-2.94865	-18.6694
258	-0.11266	-0.00925	-0.24147	-0.23887	-0.06096	-0.47483	-0.208433	0.168566	-0.276664	258	-5.65052	-0.463939	-12.1111	-11.9807	-3.05748	-23.8154	-10.4541	8.45453	-13.8763		258	-0.11266	-0.00925	-0.24147	0.000297	0.107617	0.813677	0.00151	-0.16245	0.275647	258	-5.65052	-0.463939	-12.1111	0.0148962	5.39759	40.8104	0.0757349	-8.14777	13.8252
257	-0.08956	-0.23588	-0.35294	-0.01699	0.07215	-0.18282	0.0357673	0.202852	0.227834	257	-4.49193	-11.8307	-17.7019	-0.852143	3.61872	-9.16944	1.79393	10.1742	11.4271		257	-0.08956	-0.23588	-0.35294	-0.00952	-0.10175	-0.32574	0.133198	0.343421	-0.69119	257	-4.49193	-11.8307	-17.7019	-0.477481	-5.10333	-16.3377	6.68062	17.2245	-34.667
256	-0.11376	-0.17828	-0.04799	0.194786	0.448708	-0.13501	0.119535	0.397717	0.056091	256	-5.7057	-8.94173	-2.40697	9.7696	22.5052	-6.7715	5.99534	19.9477	2.81328		256	-0.11376	-0.17828	-0.04799	0.022412	-0.11761	-0.85721	0.097736	0.236654	-0.58864	256	-5.7057	-8.94173	-2.40697	1.12409	-5.89879	-42.9938	4.902	11.8695	-29.5236
255	0.041902	0.153442	-0.24824	0.139565	-0.12024	0.498953	0.0674696	-0.304557	0.216287	255	2.10162	7.69597	-12.4506	6.99996	-6.0307	25.0253	3.38398	-15.2752	10.848		255	0.041902	0.153442	-0.24824	0.067904	0.201612	-0.04902	-0.01999	0.133648	0.321027	255	2.10162	7.69597	-12.4506	3.40576	10.112	-2.45863	-1.00261	6.70319	16.1013
254	-0.21137	-0.03899	-0.42437	-0.12502	-0.10058	-0.16694	-0.0962237	-0.288602	-0.178959	254	-10.6014	-1.95557	-21.2845	-6.27045	-5.04465	-8.37297	-4.82615	-14.475	-8.9758		254	-0.21137	-0.03899	-0.42437	0.070131	-0.02362	0.788574	0.077964	-0.04011	0.569811	254	-10.6014	-1.95557	-21.2845	3.51746	-1.18467	39.5514	3.91033	-2.01174	28.5792
253	-0.01121	0.045202	0.010601	-0.00052	-0.18492	-0.25317	-0.136085	-0.42036	-0.197969	253	-0.562244	2.26713	0.531699	-0.0260809	-9.27477	-12.6979	-6.82542	-21.0834	-9.92924		253	-0.01121	0.045202	0.010601	0.059068	0.23497	-0.66679	0.095835	-0.16408	0.00061	253	-0.562244	2.26713	0.531699	2.96259	11.7851	-33.4432	4.80666	-8.22952	0.0305949
252	0.167705	0.220944	0.118611	0.263428	0.43358	0.491768	-0.0889404	-0.256731	0.0841644	252	8.41134	11.0816	5.949	13.2124	21.7464	24.6649	-4.46086	-12.8765	4.22131		252	0.167705	0.220944	0.118611	0.025151	0.211633	0.05798	-0.03179	0.264712	-0.93121	252	8.41134	11.0816	5.949	1.26146	10.6146	2.90802	-1.59445	13.2768	-46.7054
251	-0.00328	0.108624	-0.05802	0.338476	0.52521	0.52884	-0.0131257	0.322355	-0.0320999	251	-0.16451	5.4481	-2.91003	16.9765	26.3422	26.5243	-0.658327	16.1679	-1.60999		251	-0.00328	0.108624	-0.05802	0.078649	-0.03323	0.231462	-0.02887	-0.14841	0.639589	251	-0.16451	5.4481	-2.91003	3.94468	-1.66667	11.6091	-1.44799	-7.44359	32.0789
250	-0.08502	-0.24687	0.149697	-0.03003	0.113741	0.092196	-0.129894	-0.355447	0.0278166	250	-4.26423	-12.3819	7.50814	-1.50617	5.70474	4.62414	-6.51491	-17.8276	1.39516		250	-0.08502	-0.24687	0.149697	0.066831	0.095479	0.647138	0.034531	-0.00921	-0.4349	250	-4.26423	-12.3819	7.50814	3.35195	4.7888	32.4576	1.73192	-0.461933	-21.8127
249	-0.25729	-0.33243	-0.39603	-0.18759	-0.28279	-0.5368	-0.118625	-0.0508965	-0.125214	249	-12.9045	-16.6732	-19.8631	-9.40868	-14.1835	-26.9235	-5.9497	-2.55274	-6.28018		249	-0.25729	-0.33243	-0.39603	-0.02016	-0.1321	-0.79382	0.038119	0.123193	-0.33511	249	-12.9045	-16.6732	-19.8631	-1.01114	-6.62555	-39.8145	1.91188	6.17881	-16.8076
248	-0.15847	-0.21754	-0.36337	-0.11201	0.142848	0.076442	-0.244948	0.00892481	-0.413143	248	-7.94815	-10.9108	-18.225	-5.61792	7.16462	3.83399	-12.2855	0.447629	-20.7214		248	-0.15847	-0.21754	-0.36337	0.070007	0.179395	0.17266	-0.001	0.203097	0.719285	248	-7.94815	-10.9108	-18.225	3.51124	8.99766	8.65986	-0.0501556	10.1864	36.0761
247	-0.12288	-0.17323	-0.35278	0.031403	0.215683	0.331463	-0.0672537	0.0925224	-0.194989	247	-6.16311	-8.68845	-17.6939	1.57503	10.8177	16.6247	-3.37315	4.64051	-9.77977		247	-0.12288	-0.17323	-0.35278	0.02463	-0.06877	-0.11377	-0.03855	-0.19494	-0.41804	247	-6.16311	-8.68845	-17.6939	1.23533	-3.4492	-5.7062	-1.9335	-9.77732	-20.967
246	-0.16817	-0.29173	0.021706	-0.1397	-0.08011	-0.51891	-0.0481906	-0.217338	0.0155269	246	-8.43466	-14.6319	1.08868	-7.00673	-4.01796	-26.0262	-2.41703	-10.9007	0.778762		246	-0.16817	-0.29173	0.021706	-0.08616	-0.10845	0.311471	-0.08627	-0.23442	-0.57459	246	-8.43466	-14.6319	1.08868	-4.3214	-5.43937	15.622	-4.32692	-11.7575	-28.8189
245	-0.20508	-0.34512	-0.35148	-0.08908	-0.10519	0.183866	-0.074944	-0.0322185	0.0719663	245	-10.2859	-17.3097	-17.6287	-4.46786	-5.27586	9.2219	-3.75886	-1.61594	3.60951		245	-0.20508	-0.34512	-0.35148	0.068608	0.023312	-0.91375	0.105234	0.034165	0.182606	245	-10.2859	-17.3097	-17.6287	3.44107	1.16923	-45.8296	5.27807	1.71356	9.15871
244	0.004524	0.091412	-0.13354	0.144338	0.074855	0.411082	0.0775819	-0.287382	0.139741	244	0.226904	4.58482	-6.69777	7.23935	3.75439	20.618	3.89116	-14.4138	7.0088		244	0.004524	0.091412	-0.13354	0.100333	-0.00813	-0.32406	0.171775	0.297255	1.10016	244	0.226904	4.58482	-6.69777	5.03226	-0.407765	-16.2534	8.61547	14.909	55.1791
243	0.085764	-0.06814	0.065744	-0.0332	0.210512	0.104158	-0.168013	0.110739	-0.114636	243	4.30154	-3.4176	3.29743	-1.66516	10.5583	5.2241	-8.42679	5.55416	-5.74964		243	0.085764	-0.06814	0.065744	0.180461	0.103482	0.513204	0.099761	-0.05298	-0.38301	243	4.30154	-3.4176	3.29743	9.05112	5.1902	25.74	5.00357	-2.65724	-19.2101
242	-0.17231	-0.36634	-0.14296	-0.29752	-0.14411	-0.34211	-0.198149	-0.0910164	-0.1455	242	-8.6423	-18.374	-7.17024	-14.9223	-7.22792	-17.1587	-9.93827	-4.56498	-7.29764		242	-0.17231	-0.36634	-0.14296	0.116123	0.311903	1.04131	0.0551	-0.20402	-0.32276	242	-8.6423	-18.374	-7.17024	5.82421	15.6437	52.2277	2.76357	-10.2327	-16.1882
241	-0.16768	-0.27508	0.109783	-0.25136	-0.08832	0.038358	-0.163979	-0.42825	0.00830628	241	-8.41008	-13.7968	5.50623	-12.6071	-4.42974	1.92387	-8.22446	-21.4791	0.416606		241	-0.16768	-0.27508	0.109783	0.085445	0.159544	-0.7119	0.073488	0.305329	0.244229	241	-8.41008	-13.7968	5.50623	4.28554	8.00202	-35.7057	3.68583	15.3139	12.2494
240	-0.0722	0.046492	0.173383	-0.14933	-0.13638	0.122691	-0.172734	-0.398349	-0.324279	240	-3.62123	2.33183	8.69612	-7.48973	-6.84021	6.15364	-8.66357	-19.9794	-16.2644		240	-0.0722	0.046492	0.173383	0.133385	-0.05907	0.962957	0.098872	-0.06973	0.750365	240	-3.62123	2.33183	8.69612	6.69	-2.96269	48.2976	4.95898	-3.49735	37.635
239	-0.19595	-0.29279	-0.01399	0.019079	-0.10348	0.343978	-0.0160381	0.107043	-0.126735	239	-9.82798	-14.685	-0.701676	0.956918	-5.1901	17.2524	-0.8044	5.36882	-6.35645		239	-0.19595	-0.29279	-0.01399	0.167913	0.072136	0.314397	0.025639	-0.26781	-0.69066	239	-9.82798	-14.685	-0.701676	8.42177	3.61802	15.7688	1.28594	-13.4322	-34.6404
238	-0.33779	-0.16761	-0.04822	-0.10824	-0.06949	-0.17093	-0.0752437	-0.314304	0.0296715	238	-16.942	-8.40657	-2.4185	-5.42884	-3.48531	-8.57309	-3.77389	-15.7641	1.48819		238	-0.33779	-0.16761	-0.04822	0.113004	0.303543	0.67655	0.055671	0.34634	1.00813	238	-16.942	-8.40657	-2.4185	5.66778	15.2244	33.9327	2.79221	17.3709	50.5632
237	-0.07711	0.081765	-0.2561	-0.23202	-0.49732	-0.38615	-0.2372	-0.340278	-0.272062	237	-3.86749	4.10097	-12.8448	-11.6371	-24.9434	-19.3676	-11.8969	-17.0668	-13.6454		237	-0.07711	0.081765	-0.2561	0.020135	-0.00714	-0.47004	0.069715	-0.05726	0.044828	237	-3.86749	4.10097	-12.8448	1.00988	-0.358111	-23.5751	3.49659	-2.87191	2.24837
236	0.000784	-0.16457	0.135366	-0.24663	-0.48047	-0.18278	-0.336393	-0.0804226	-0.388554	236	0.039322	-8.2541	6.78936	-12.3699	-24.0982	-9.16743	-16.872	-4.03364	-19.4882		236	0.000784	-0.16457	0.135366	-0.044	-0.20172	0.369776	0.031069	0.03834	0.237468	236	0.039322	-8.2541	6.78936	-2.20684	-10.1174	18.5463	1.55828	1.92296	11.9103
235	-0.53493	-0.44257	-0.34487	-0.52214	-0.48145	-0.41378	-0.367111	-0.642589	-0.456988	235	-26.8297	-22.1973	-17.2971	-26.1882	-24.1474	-20.7534	-18.4127	-32.2294	-22.9205		235	-0.53493	-0.44257	-0.34487	-0.01355	-0.0574	-0.14151	-0.03076	0.167857	0.167853	235	-26.8297	-22.1973	-17.2971	-0.679608	-2.87893	-7.09751	-1.54278	8.41896	8.41876
234	-0.52484	-0.71837	-0.35365	-0.34783	-0.53966	-0.53004	-0.168281	0.103142	-0.0431838	234	-26.3236	-36.0302	-17.7375	-17.4456	-27.0669	-26.5845	-8.44023	5.17316	-2.16591		234	-0.52484	-0.71837	-0.35365	0.121602	-0.06413	-0.86708	0.061595	-0.14417	-0.05904	234	-26.3236	-36.0302	-17.7375	6.09902	-3.21648	-43.4889	3.08933	-7.23093	-2.96118
233	-0.45702	-0.35747	-0.24193	-0.30488	-0.07581	-0.11304	-0.275114	-0.385847	-0.260712	233	-22.9221	-17.9291	-12.1341	-15.2914	-3.80229	-5.66958	-13.7985	-19.3524	-13.0762		233	-0.45702	-0.35747	-0.24193	0.170436	0.295339	-0.02232	0.125099	0.304538	1.00039	233	-22.9221	-17.9291	-12.1341	8.54831	14.8129	-1.11947	6.27441	15.2743	50.1753
232	-0.67873	-0.58093	-0.40277	-0.41967	-0.56929	-0.6307	-0.243194	0.0730352	-0.296188	232	-34.0421	-29.1369	-20.2012	-21.0488	-28.5531	-31.6331	-12.1975	3.66312	-14.8555		232	-0.67873	-0.58093	-0.40277	0.128596	0.202486	0.00479	0.052387	0.342944	0.613634	232	-34.0421	-29.1369	-20.2012	6.4498	10.1558	0.240245	2.6275	17.2005	30.7772
231	-0.84861	-0.72545	-0.82928	-0.61686	-0.87291	-0.51896	-0.275406	0.0953852	-0.154078	231	-42.5625	-36.3853	-41.593	-30.939	-43.7813	-26.0287	-13.8131	4.7841	-7.72788		231	-0.84861	-0.72545	-0.82928	0.071186	-0.12426	0.292049	0.051984	0.096426	0.325432	231	-42.5625	-36.3853	-41.593	3.57037	-6.23233	14.6479	2.60729	4.8363	16.3222
230	-0.72612	-0.71456	-0.81944	-0.64171	-0.35084	-0.65122	-0.562322	-0.702816	-0.729715	230	-36.419	-35.8392	-41.0995	-32.1853	-17.5966	-32.6623	-28.2036	-35.2501	-36.5993		230	-0.72612	-0.71456	-0.81944	0.213263	0.047718	0.363046	0.142889	0.273724	0.847642	230	-36.419	-35.8392	-41.0995	10.6963	2.39332	18.2088	7.16668	13.7288	42.514
229	-0.91466	-0.7765	-0.6514	-0.80178	-0.81575	-0.68297	-0.581141	-0.792916	-0.643009	229	-45.8753	-38.9458	-32.6713	-40.2137	-40.9144	-34.2547	-29.1474	-39.7691	-32.2505		229	-0.91466	-0.7765	-0.6514	0.220392	0.341157	-0.09972	0.095789	0.306404	-0.69677	229	-45.8753	-38.9458	-32.6713	11.0539	17.1109	-5.00151	4.80435	15.3679	-34.9469
228	-1.05941	-1.07958	-1.0649	-0.6439	-0.42634	-0.82623	-0.477437	-0.408549	-0.393023	228	-53.1353	-54.1469	-53.4107	-32.2952	-21.3833	-41.44	-23.9461	-20.491	-19.7123		228	-1.05941	-1.07958	-1.0649	0.281283	0.15524	0.523687	0.045342	0.29331	0.96944	228	-53.1353	-54.1469	-53.4107	14.1079	7.78615	26.2658	2.27415	14.7111	48.6228
227	-1.08659	-0.96629	-0.98654	-0.64627	-0.60213	-0.85917	-0.61564	-0.660339	-0.494783	227	-54.4985	-48.4648	-49.4805	-32.414	-30.2002	-43.0921	-30.8778	-33.1197	-24.8161		227	-1.08659	-0.96629	-0.98654	0.184898	0.111172	0.674479	0.041434	0.128156	-0.53954	227	-54.4985	-48.4648	-49.4805	9.27366	5.57589	33.8289	2.07815	6.42774	-27.0609
226	-1.05229	-1.25201	-1.22622	-0.78587	-0.74342	-0.78784	-0.897182	-1.28211	-1.06328	226	-52.7782	-62.7953	-61.5017	-39.4157	-37.2866	-39.5146	-44.9987	-64.305	-53.3295		226	-1.05229	-1.25201	-1.22622	-0.02488	0.086633	0.294986	-0.0414	-0.32111	-0.71635	226	-52.7782	-62.7953	-61.5017	-1.24787	4.34513	14.7952	-2.07644	-16.1055	-35.9289
225	-1.07266	-1.08964	-1.15844	-0.97733	-0.99691	-1.06961	-0.829894	-0.972538	-0.870255	225	-53.7999	-54.6515	-58.1022	-49.0185	-50.0006	-53.6469	-41.6238	-48.7782	-43.6481		225	-1.07266	-1.08964	-1.15844	0.038662	-0.09815	0.980304	-0.09569	0.154577	-0.43277	225	-53.7999	-54.6515	-58.1022	1.93911	-4.92277	49.1677	-4.79939	7.7529	-21.7058
224	-1.39801	-1.33958	-1.17465	-1.10213	-1.2823	-1.14424	-0.813749	-0.782953	-0.899068	224	-70.118	-67.1874	-58.9152	-55.2779	-64.3145	-57.39	-40.814	-39.2694	-45.0932		224	-1.39801	-1.33958	-1.17465	0.216857	0.280361	-0.38148	0.038894	-0.05885	-0.01754	224	-70.118	-67.1874	-58.9152	10.8766	14.0617	-19.1333	1.95075	-2.95165	-0.879728
223	-1.67187	-1.51441	-1.63807	-1.16043	-1.1832	-0.80587	-0.945156	-1.2173	-0.757887	223	-83.8536	-75.9561	-82.1583	-58.202	-59.3441	-40.4189	-47.4048	-61.0543	-38.0123		223	-1.67187	-1.51441	-1.63807	0.268635	0.373067	-0.04511	0.169951	0.434667	-0.70264	223	-83.8536	-75.9561	-82.1583	13.4735	18.7114	-2.26252	8.52399	21.801	-35.2413
222	-1.52692	-1.33929	-1.7356	-1.34563	-1.42131	-1.05781	-1.12315	-1.15995	-1.12801	222	-76.5835	-67.1728	-87.05	-67.4908	-71.2866	-53.055	-56.3322	-58.1777	-56.5758		222	-1.52692	-1.33929	-1.7356	0.112288	-0.05976	-0.46103	0.145748	0.354908	-0.71374	222	-76.5835	-67.1728	-87.05	5.63187	-2.9973	-23.1232	7.31007	17.8006	-35.798
221	-1.6623	-1.47567	-1.56686	-1.43145	-1.22226	-1.78425	-1.10122	-0.826688	-1.07459	221	-83.3736	-74.013	-78.5867	-71.7952	-61.3031	-89.49	-55.2323	-41.463	-53.8965		221	-1.6623	-1.47567	-1.56686	0.066726	0.149379	-0.42078	0.05533	0.306476	0.116668	221	-83.3736	-74.013	-78.5867	3.34668	7.49219	-21.1045	2.77511	15.3715	5.85155
220	-1.77049	-1.77996	-1.76398	-1.2261	-1.1521	-0.88952	-0.908095	-1.14463	-1.02782	220	-88.7999	-89.2749	-88.4734	-61.4957	-57.7842	-44.6144	-45.546	-57.4097	-51.5511		220	-1.77049	-1.77996	-1.76398	0.084414	0.236475	0.231424	-0.03382	-0.32539	-0.1996	220	-88.7999	-89.2749	-88.4734	4.23383	11.8605	11.6072	-1.69626	-16.3201	-10.011
219	-1.74571	-1.83822	-1.71384	-1.16409	-0.90309	-1.21084	-0.740203	-0.769419	-0.629734	219	-87.5571	-92.1969	-85.9586	-58.3856	-45.295	-60.7304	-37.1253	-38.5907	-31.5846		219	-1.74571	-1.83822	-1.71384	-0.05113	-0.15391	0.91237	-0.13481	-0.17014	-0.61827	219	-87.5571	-92.1969	-85.9586	-2.56445	-7.71944	45.7604	-6.76147	-8.53347	-31.0097
218	-1.60347	-1.42345	-1.36985	-0.9259	-0.66066	-1.18554	-0.738069	-0.6611	-0.699323	218	-80.4229	-71.3939	-68.7056	-46.439	-33.1358	-59.4614	-37.0183	-33.1578	-35.0749		218	-1.60347	-1.42345	-1.36985	0.067594	0.040624	-0.88051	0.042665	0.266863	0.41166	218	-80.4229	-71.3939	-68.7056	3.39021	2.03752	-44.1625	2.13989	13.3847	20.647
217	-1.65121	-1.77981	-1.48607	-0.81454	-0.82481	-0.74602	-0.628964	-0.578448	-0.517608	217	-82.8174	-89.2674	-74.5347	-40.8537	-41.3688	-37.417	-31.546	-29.0124	-25.9609		217	-1.65121	-1.77981	-1.48607	0.096235	0.29305	-0.39081	0.106356	-0.16237	0.858552	217	-82.8174	-89.2674	-74.5347	4.82672	14.6981	-19.6013	5.33434	-8.14376	43.0612
216	-1.53714	-1.54471	-1.59759	-0.99981	-1.19055	-1.14432	-0.708728	-0.997723	-0.886326	216	-77.0961	-77.4758	-80.128	-50.146	-59.7127	-57.394	-35.5466	-50.0414	-44.4542		216	-1.53714	-1.54471	-1.59759	0.249552	0.395421	-0.48863	-0.1836	0.053462	0.57385	216	-77.0961	-77.4758	-80.128	12.5164	19.8326	-24.5075	-9.20856	2.68142	28.7818
215	-1.64232	-1.58274	-1.37335	-0.98318	-1.22735	-0.91525	-0.783048	-0.970068	-0.96126	215	-82.3715	-79.3832	-68.8811	-49.3119	-61.5584	-45.9049	-39.2742	-48.6543	-48.2125		215	-1.64232	-1.58274	-1.37335	0.195512	0.380631	-0.22138	-0.18303	-0.03674	0.414597	215	-82.3715	-79.3832	-68.8811	9.80601	19.0908	-11.1034	-9.17997	-1.84272	20.7943
214	-1.57055	-1.55103	-1.71814	-1.29132	-1.58087	-1.1332	-1.18422	-1.17848	-1.28752	214	-78.7718	-77.7928	-86.1743	-64.7669	-79.2894	-56.8363	-59.3952	-59.1075	-64.5764		214	-1.57055	-1.55103	-1.71814	0.156832	0.153733	-0.83184	-0.02923	-0.18507	0.062868	214	-78.7718	-77.7928	-86.1743	7.866	7.71056	-41.7214	-1.46605	-9.28229	3.15318
213	-1.59988	-1.45666	-1.57189	-0.94157	-1.22607	-0.73801	-0.794927	-0.694123	-0.671817	213	-80.2429	-73.0596	-78.839	-47.225	-61.4942	-37.0153	-39.87	-34.8141	-33.6954		213	-1.59988	-1.45666	-1.57189	0.095049	0.182431	0.517172	-0.01107	-0.02323	0.233472	213	-80.2429	-73.0596	-78.839	4.76724	9.14993	25.939	-0.555222	-1.16511	11.7099
212	-1.24851	-1.37836	-1.51266	-0.73625	-0.87139	-1.08394	-0.607389	-0.473523	-0.433499	212	-62.6197	-69.1324	-75.8683	-36.927	-43.705	-54.3656	-30.4639	-23.7498	-21.7424		212	-1.24851	-1.37836	-1.51266	0.079919	0.192891	0.128514	-0.07612	-0.07081	-0.45338	212	-62.6197	-69.1324	-75.8683	4.00838	9.67456	6.44569	-3.81784	-3.55151	-22.7395
211	-1.26249	-1.1862	-1.02088	-0.87513	-0.72507	-1.23669	-0.772962	-0.537611	-0.71398	211	-63.3209	-59.4945	-51.2028	-43.8926	-36.3663	-62.0269	-38.7683	-26.9642	-35.8101		211	-1.26249	-1.1862	-1.02088	0.060443	0.192557	-0.20988	-0.1703	-0.2838	-0.3198	211	-63.3209	-59.4945	-51.2028	3.03155	9.6578	-10.5266	-8.54149	-14.2341	-16.0397
210	-1.31257	-1.44615	-1.55675	-0.95393	-0.85896	-1.10303	-0.89438	-1.00764	-1.01043	210	-65.8327	-72.5325	-78.0797	-47.8449	-43.0816	-55.3231	-44.8581	-50.5386	-50.6789		210	-1.31257	-1.44615	-1.55675	-0.04842	-0.23299	0.882826	-0.07234	-0.24171	-0.11566	210	-65.8327	-72.5325	-78.0797	-2.42853	-11.6857	44.2786	-3.62825	-12.1231	-5.80099
209	-0.76321	-0.72763	-0.68687	-0.33363	-0.04546	-0.58233	-0.498993	-0.324327	-0.456477	209	-38.2792	-36.4947	-34.4503	-16.7334	-2.28007	-29.2071	-25.0273	-16.2668	-22.8949		209	-0.76321	-0.72763	-0.68687	0.028403	0.133466	-0.88809	-0.09543	0.085057	-0.9313	209	-38.2792	-36.4947	-34.4503	1.42457	6.69406	-44.5426	-4.78634	4.26608	-46.7099
208	-0.71659	-0.74223	-0.99111	-0.33472	-0.43958	-0.17075	-0.536695	-0.475355	-0.426681	208	-35.941	-37.227	-49.7097	-16.7881	-22.0474	-8.56406	-26.9182	-23.8417	-21.4004		208	-0.71659	-0.74223	-0.99111	0.124632	-0.05803	0.620908	-0.21398	-0.36951	-1.1939	208	-35.941	-37.227	-49.7097	6.25099	-2.91053	31.142	-10.7323	-18.533	-59.8807
207	-0.51156	-0.61883	-0.80766	-0.16246	-0.1871	0.011691	-0.150507	0.0245979	-0.06819	207	-25.6576	-31.0378	-40.5086	-8.14827	-9.3841	0.586369	-7.54876	1.23372	-3.42011		207	-0.51156	-0.61883	-0.80766	0.147171	-0.01064	-0.21815	-0.08211	0.0008	-0.8024	207	-25.6576	-31.0378	-40.5086	7.38144	-0.533655	-10.9414	-4.11827	0.0401244	-40.2448
206	0.183809	0.196108	0.230253	-0.02937	-0.11865	0.322702	0.0964916	-0.0573075	0.160126	206	9.21904	9.83591	11.5485	-1.47307	-5.95096	16.1853	4.83959	-2.87429	8.03119		206	0.183809	0.196108	0.230253	0.018895	-0.0692	0.75797	0.162995	-0.02889	-0.1603	206	9.21904	9.83591	11.5485	0.947689	-3.47076	38.0164	8.1751	-1.44899	-8.03994
205	0.113024	0.011416	0.216985	0.195155	0.044705	0.056117	-0.122996	-0.501398	-0.0259283	205	5.66878	0.572576	10.883	9.78811	2.2422	2.81458	-6.16893	-25.1479	-1.30045		205	0.113024	0.011416	0.216985	0.025543	0.037127	0.186812	0.185342	0.296825	0.769655	205	5.66878	0.572576	10.883	1.28112	1.86213	9.36966	9.29593	14.8874	38.6025
204	0.582926	0.423993	0.317275	0.515383	0.390306	0.683836	0.116547	0.508108	0.145422	204	29.237	21.2656	15.9131	25.8493	19.576	34.2982	5.84548	25.4844	7.29372		204	0.582926	0.423993	0.317275	-0.11336	0.003745	0.512217	-0.01313	0.043621	-0.0766	204	29.237	21.2656	15.9131	-5.68563	0.187833	25.6905	-0.658542	2.18784	-3.84192
203	0.790455	0.956611	0.738576	0.474019	0.411647	0.369319	0.352015	0.191675	0.167318	203	39.6457	47.9794	37.0437	23.7747	20.6464	18.5234	17.6555	9.61356	8.39192		203	0.790455	0.956611	0.738576	-0.08155	-0.25682	-0.03857	-0.07887	0.125387	-0.87734	203	39.6457	47.9794	37.0437	-4.09019	-12.8809	-1.9345	-3.95577	6.28885	-44.0035
202	0.828253	0.916764	0.794389	0.412	0.221806	0.411533	0.194439	0.0520467	0.00698935	202	41.5415	45.9808	39.843	20.6641	11.1248	20.6407	9.7522	2.61043	0.350555		202	0.828253	0.916764	0.794389	-0.33336	-0.3201	-0.37846	-0.05146	-0.17734	-0.98442	202	41.5415	45.9808	39.843	-16.7199	-16.0548	-18.9819	-2.581	-8.89459	-49.3741
201	0.775755	0.734342	0.622829	0.164057	0.28824	0.38064	-0.134461	-0.144558	-0.055023	201	38.9084	36.8313	31.2383	8.22837	14.4568	19.0912	-6.74397	-7.2504	-2.75971		201	0.775755	0.734342	0.622829	-0.23258	-0.07366	-1.14062	-0.02017	0.250473	-0.47215	201	38.9084	36.8313	31.2383	-11.6652	-3.69446	-57.2084	-1.01164	12.5626	-23.6809
200	0.854381	0.833946	0.631167	0.289117	0.449026	0.293108	0.505137	0.871893	0.369325	200	42.852	41.827	31.6565	14.5008	22.5211	14.701	25.3354	43.7303	18.5237		200	0.854381	0.833946	0.631167	-0.15423	-0.29477	-0.18766	0.050226	-0.06521	-0.06279	200	42.852	41.827	31.6565	-7.73549	-14.7844	-9.41219	2.51911	-3.27064	-3.14927
199	1.05824	1.03283	1.0144	0.461196	0.570832	0.350039	0.343582	0.33696	0.311866	199	53.0766	51.802	50.878	23.1315	28.6304	17.5564	17.2325	16.9004	15.6418		199	1.05824	1.03283	1.0144	-0.13313	-0.03931	-0.75177	-0.04471	-0.16236	0.021	199	53.0766	51.802	50.878	-6.67721	-1.97161	-37.7054	-2.24245	-8.14326	1.05327
198	1.04553	1.20331	1.11378	0.429417	0.719812	0.033628	0.207931	0.163905	0.025759	198	52.4391	60.3526	55.8621	21.5376	36.1026	1.68663	10.4289	8.22073	1.29196		198	1.04553	1.20331	1.11378	-0.0301	-0.13395	-0.29758	-0.09556	0.150685	-0.37148	198	52.4391	60.3526	55.8621	-1.50968	-6.71834	-14.9253	-4.79286	7.55769	-18.6318
197	0.980696	0.941706	0.794366	0.535292	0.689292	0.85812	0.28795	0.564669	0.0916663	197	49.1874	47.2318	39.8419	26.8479	34.5718	43.0395	14.4423	28.3213	4.59757		197	0.980696	0.941706	0.794366	-0.12304	-0.14222	-1.09514	-0.24496	0.017366	-0.7692	197	49.1874	47.2318	39.8419	-6.17114	-7.13312	-54.9274	-12.2861	0.871001	-38.5797
196	1.40656	1.33484	1.56815	0.364312	0.092818	0.135318	-0.13947	0.104923	0.0120605	196	70.5468	66.9497	78.6513	18.2723	4.65534	6.78695	-6.9952	5.26249	0.604902		196	1.40656	1.33484	1.56815	-0.23333	-0.28866	-0.08256	-0.43102	-0.56597	0.238927	196	70.5468	66.9497	78.6513	-11.7028	-14.4779	-4.14084	-21.618	-28.3865	11.9835
195	0.640855	0.782257	0.494689	0.241968	0.45514	0.399373	0.493464	0.874477	0.517304	195	32.1424	39.2345	24.8114	12.136	22.8278	20.0308	24.75	43.8599	25.9456		195	0.640855	0.782257	0.494689	-0.28713	-0.32112	0.08488	-0.52029	-0.56753	0.46581	195	32.1424	39.2345	24.8114	-14.4012	-16.106	4.2572	-26.0954	-28.4648	23.363
194	0.913289	0.771501	0.867991	-0.15892	-0.00646	-0.18711	-0.125648	-0.041044	-0.319623	194	45.8065	38.6951	43.5346	-7.97072	-0.324005	-9.38461	-6.30195	-2.05859	-16.0309		194	0.913289	0.771501	0.867991	-0.16065	-0.14627	-0.38215	-0.3448	-0.41865	0.555439	194	45.8065	38.6951	43.5346	-8.05749	-7.33625	-19.1669	-17.2936	-20.9976	27.8584
193	-0.07162	-0.10171	-0.09038	-1.15927	-1.00394	-1.15899	-0.0873008	-0.100104	-0.000651438	193	-3.59214	-5.10132	-4.53306	-58.1438	-50.3532	-58.1298	-4.37862	-5.02076	-0.0326732		193	-0.07162	-0.10171	-0.09038	0.519615	0.375448	0.46478	-0.63275	-0.46549	0.029492	193	-3.59214	-5.10132	-4.53306	26.0616	18.8308	23.3113	-31.7359	-23.3469	1.47919
192	1.06645	1.05882	1.13988	0.501748	0.248695	0.326032	-0.658959	-0.81544	-0.657632	192	53.4884	53.1056	57.1713	25.1654	12.4734	16.3523	-33.0505	-40.8988	-32.9839		192	1.06645	1.05882	1.13988	0.379472	0.458161	1.10526	-1.07644	-0.98974	-0.50166	192	53.4884	53.1056	57.1713	19.0326	22.9793	55.4347	-53.9894	-49.641	-25.161
191	0.701953	0.516459	0.804434	-0.36235	-0.35497	-0.27201	-0.258196	-0.195266	-0.226893	191	35.2068	25.9033	40.3468	-18.1739	-17.8037	-13.6428	-12.95	-9.79365	-11.3799		191	0.701953	0.516459	0.804434	-0.71811	-0.57416	-1.54712	-1.27938	-1.19009	-0.88857	191	35.2068	25.9033	40.3468	-36.0172	-28.7973	-77.5967	-64.168	-59.6896	-44.5667
190	-1.83831	-1.73945	-2.06763	-0.49626	-0.78538	-0.76504	-0.804866	-0.903919	-0.888037	190	-92.2015	-87.2431	-103.703	-24.8902	-39.3912	-38.371	-40.3685	-45.3366	-44.54		190	-1.83831	-1.73945	-2.06763	0.118697	0.06406	0.507545	-0.79589	-0.54624	-0.73825	190	-92.2015	-87.2431	-103.703	5.95331	3.21296	25.4562	-39.9183	-27.397	-37.0273

## Sheet: 2E
	0 hr			1 hr			12 hrs			24 hrs			48 hrs				Fluorescence Intensity at 500nm
	Set 1	Set 2	Set 3	Set 1	Set 2	Set 3	Set 1	Set 2	Set 3	Set 1	Set 2	Set 3	Set 1	Set 2	Set 3		Time(hr)	Set 1	Set 2	Set 3
469.462	0	0	0.871668	59.4921	86.4317	102.466	136.276	135.932	133.026	134.144	144.234	140.713	132.855	137.158	135.952		0	27.9298	26.4682	27.6167
469.957	0	0	1.57097	69.0177	78.8698	95.4064	141.459	135.287	127.794	141.946	138.771	142.335	131.262	127.949	131.685		1	105.197	100.279	127.177
470.453	0	6.2385	0.483457	89.8158	91.7126	105.408	156.892	152.443	138.932	131.42	149.532	149.729	128.599	126.981	131.96		6	212.357	207.169	229.338
470.948	0	0	0	76.6975	86.2044	98.1625	153.777	143.47	141.496	149.339	135.223	131.25	121.944	117.601	120.786		12	249.82	229.6	233.939
471.443	0	0	2.83941	86.3844	96.5005	106.945	157.834	162.069	147.174	146.386	150.876	150.258	137.621	141.465	137.543		24	226.269	221.482	222.286
471.938	0	13.2696	2.3796	65.1768	96.6318	120.502	172.007	174.664	150.147	170.071	145.609	146.864	145.784	147.624	148.208		48	197.172	201.54	193.616
472.433	0	10.4252	0	69.5363	83.7827	119.119	167.067	172.874	148.755	160.046	149.39	150.577	139.982	137.103	135.811
472.928	0	4.25788	0	154.267	94.8487	105.468	184.47	172.629	166.127	175.327	172.704	173.49	141.665	143.484	142.208
473.422	0	0	0	70.5755	97.7939	118.752	178.068	175.692	168.418	170.72	177.283	174.177	158.54	161.228	155.244
473.917	0	0	0	83.7809	92.7053	126.629	191.686	175.46	183.469	179.669	177.813	180.941	170.952	170.83	167.774
474.411	0	11.1212	0	92.3354	100.516	124.277	194.853	183.722	172.052	166.72	178.411	182.68	161.832	162.311	163.513
474.906	2.47797	11.8639	0.937544	102.355	98.2117	124.011	199.47	184.093	186.514	180.831	175.938	175.76	161.677	163.796	156.75
475.4	13.7203	12.1261	12.7667	95.706	92.2968	136.736	205.378	177.36	177.529	181.541	188.438	190.659	168.104	168.175	171.664
475.895	0	19.2186	2.14982	87.9648	107.696	118.281	197.208	192.663	188.392	191.086	195.885	194.276	156.896	160.582	152.987
476.389	4.37811	0	0	88.9894	111.357	136.017	207.575	191.852	202.778	187.617	188.424	188.849	171.155	167.03	170.814
476.883	13.4932	8.17181	14.1535	102.238	105.305	130.859	213.745	201.252	191.835	193.577	186.412	185.468	178.283	173.379	181.811
477.377	1.13913	19.1906	1.76015	102.89	99.5244	121.621	195.15	198.198	185.395	198.882	201.383	197.684	174.881	179.215	176.425
477.871	14.7969	8.33111	15.0776	97.3475	117.216	135.932	222.081	187.777	184.489	196.26	203.682	203.132	182.89	181.152	179.425
478.365	13.4318	0	14.4756	98.2059	112.557	143.309	209.073	208.487	200.775	199.498	200.856	202.044	187.868	185.061	190.538
478.859	0.188527	18.0676	2.57583	100.112	106.156	136.031	225.129	214.566	203.655	210.858	199.41	195.364	179.873	182.748	178.29
479.352	20.7183	11.2828	14.5689	110.86	101.737	141.361	226.204	222.476	211.163	198.431	202.979	205.19	190.427	195.132	187.636
479.846	13.3735	21.3046	10.6036	101.331	105.685	118.968	225.849	214.752	204.224	216.312	212.388	211.582	189.686	188.447	193.596
480.339	8.85657	0	5.22433	101	115.683	128.246	220.784	208.234	210.888	195.703	204.956	203.319	184.306	187.139	183.833
480.833	3.01676	14.2902	3.96393	103.117	90.7588	133.031	227.366	213.267	213.832	208.998	211.849	210.357	189.499	185.198	188.922
481.326	19.4175	22.9178	15.752	97.3014	106.527	147.142	237.658	199.259	213.424	206.519	209.748	208.036	175.534	174.039	175.851
481.82	6.97159	1.83063	1.04517	117.075	104.781	127.293	242.693	230.68	211.997	188.912	214.339	213.932	200.102	203.373	199.771
482.313	20.1582	0	15.6721	109.205	97.2567	143.279	238.606	227.439	208.961	206.571	218.257	220.947	193.675	189.067	194.311
482.806	9.60892	16.3582	2.76891	101.92	111.535	144.044	228.306	225.004	223.637	223.709	220.906	221.085	182.208	181.139	181.116
483.299	8.86172	19.8994	5.61323	112.849	90.007	128.32	242.302	232.912	210.823	215.399	216.363	218.122	194.02	192.556	195.907
483.792	20.1977	10.3975	18.9426	108.856	107.606	134.315	237.78	229.964	223.868	209.991	226.595	226.908	198.202	198.954	201.649
484.285	6.03938	14.1268	0	101.531	115.487	141.648	251.767	230.492	228.723	205.431	215.444	214.809	193.831	192.965	189.844
484.777	3.39329	14.8747	0	104.223	107.652	134.328	239.681	226.452	233.916	232.871	232.881	237.632	197.754	194.838	199.185
485.27	21.1056	20.6876	16.5087	135.606	104.23	132.016	236.455	224.854	204.691	200.602	230.911	235.61	209.538	206.101	207.971
485.763	20.9221	30.665	16.0108	95.7881	99.3708	131.859	242.41	227.173	206.056	210.813	218.552	217.903	188.309	185.298	189.828
486.255	24.4967	21.171	20.7823	123.069	92.7708	131.634	250.268	233.719	220.096	222.234	212.475	208.86	179.409	179.013	184.324
486.748	16.1934	20.6298	12.988	99.9888	96.0792	141.509	247.687	244.108	222.749	212.29	219.832	216.062	186.612	187.34	191.55
487.24	34.0661	29.0276	29.532	119.933	109.541	140.505	245.735	231.176	219.457	234.749	216.353	217.45	204.203	205.105	200.552
487.732	24.4641	7.21436	22.1613	102.172	101.649	141.05	244.782	235.293	233.318	223.254	224.774	226.742	209.627	206.649	211.53
488.224	23.7062	18.4501	20.4221	111.487	105.94	114.696	234.609	240.709	217.691	241.43	232.423	233.497	175.936	171.937	178.966
488.716	26.7082	26.1859	28.7774	103.238	103.471	146.803	244.469	231.777	235.071	216.75	214.333	209.768	189.787	187.216	188.16
489.208	21.2581	9.7857	14.9292	112.035	95.8046	141.193	247.462	220.516	214.103	237.459	233.712	229.288	204.109	204.719	201.867
489.7	23.9134	17.0951	25.5324	108.585	109.027	120.056	252.474	231.845	232.514	220.375	229.037	232.578	201.66	198.137	206.571
490.192	18.2702	21.7184	12.3668	112.732	87.6616	135.529	253.289	237.389	231.647	209.91	237.19	235.654	190.62	190.579	193.18
490.684	20.1414	18.9533	19.1762	120.697	98.4885	132.248	258.288	236.867	219.676	211.473	231.786	234.078	200.095	200.425	199.492
491.175	39.1303	20.1569	35.1651	124.174	96.7431	144.767	261.08	218.068	221.423	214.73	237.093	232.139	204.112	206.641	200.464
491.667	17.2982	0	18.6123	107.496	100.063	141.493	250.088	230.759	224.678	226.818	232.649	232.209	220.343	218.184	219.639
492.158	18.7866	33.6327	17.6218	131.461	99.9795	136.493	263.292	239.976	225.615	206.179	213.708	209.787	200.827	199.483	204.486
492.65	34.1421	11.8593	34.7979	97.0098	88.4302	137.795	246.214	249.026	217.803	222.74	215.457	218.697	194.351	190.43	197.555
493.141	22.1073	45.9693	19.8355	109.157	107.733	127.88	244.794	244.009	221.63	224.695	240.227	242.952	209.446	214.02	213.207
493.632	33.6915	10.2452	36.3616	125.404	111.737	133.933	260.858	224.654	243.641	225.794	213.855	211.613	200.087	195.941	201.499
494.123	15.9022	17.3078	8.95534	98.0461	91.3596	123.398	251.584	229.418	228.221	217.651	236.153	240.284	199.617	198.378	203.236
494.614	17.9755	22.9207	12.5796	103.148	104.874	142.778	246.855	228.49	230.471	229.992	226.079	230.769	205.213	207.567	204.84
495.105	24.7252	26.7452	22.9251	111.923	86.6171	131.411	245.294	244.335	235.785	241.858	237.375	234.666	190.69	195.063	191.175
495.596	31.0481	11.6843	26.4249	102.105	96.3691	131.404	256.641	237.042	232.08	229.549	234.6	236.348	181.254	180.306	177.994
496.087	0	13.003	1.64783	124.76	90.2745	136.629	238.555	238.012	237.522	223.624	211.899	215.695	205.997	206.337	202.376
496.577	19.7723	18.5371	19.5322	100.904	98.5254	143.539	261.421	236.776	220.476	210.488	217.773	216.974	197.163	194.567	194.967
497.068	27.0168	2.34917	22.1824	118.915	100.644	124.013	255.662	226.431	228.964	224.208	198.937	199.681	201.41	203.586	205.581
497.559	18.0701	18.6922	18.7342	111.498	90.229	126.039	247.964	233.483	225.022	220.075	232.92	234.79	194.488	193.409	196.806
498.049	17.8795	4.41086	16.2944	108.513	103.2	131.406	251.182	232.307	229.054	230.995	202.384	199.786	200.023	197.131	196.716
498.539	20.8415	0	14.4707	116.362	92.1696	136.315	251.331	234.718	220.876	225.408	223.936	226.89	202.64	201.441	200.184
499.03	15.2443	18.4151	10.8736	115.881	95.6012	133.397	261.635	223.317	232.532	219.622	225.576	230.215	187.03	182.183	185.3
499.52	24.291	33.7742	18.2824	109.877	99.4209	136.389	247.18	224.043	236.558	226.834	222.96	227.929	183.585	183.249	181.055
500.01	27.9298	26.4682	27.6167	105.197	100.279	127.177	249.82	229.6	233.939	226.269	221.482	222.286	197.172	201.54	193.616
500.5	15.3785	22.4406	12.6621	103.906	93.8037	122.951	240.644	249.299	211.978	219.441	220.383	220.593	185.107	184.74	182.232
500.99	10.5792	0	11.006	102.426	98.7734	131.508	243.234	240.8	226.595	217.222	222.427	218.367	198.775	195.611	194.731
501.479	5.56216	6.9578	2.65183	119.618	91.2788	135.076	236.27	237.018	229.502	229.399	219.048	216.746	184.859	187.201	185.187
501.969	20.0016	31.4191	17.4864	92.0952	88.5936	112.161	245.789	235.457	220.565	214.534	223.056	227.635	181.324	182.481	185.077
502.459	16.6454	19.9219	18.2096	107.574	101.376	129.014	243.648	237.177	217.315	214.982	239.733	238.129	203.066	205.028	207.03
502.948	11.4511	10.1773	10.8529	107.793	94.7948	123.299	248.913	239.072	219.228	226.123	205.493	207.874	191.532	195.233	193.569
503.438	24.5594	10.9216	22.7597	116.569	86.6778	124.012	245.249	217.192	214.762	217.593	230.326	234.283	185.589	180.808	190.367
503.927	19.9416	3.72811	22.681	107.763	98.8167	134.152	242.343	225.316	217.509	217.209	219.807	221.8	197.198	199.384	195.355
504.416	12.1736	30.4023	12.448	96.4817	89.7049	124.609	246.416	223.969	216.359	220.847	210.74	213.285	185.564	188.37	188.055
504.906	19.3433	11.7384	19.0983	99.6542	91.7975	120.221	250.436	227.015	211.498	209.905	227.025	224.377	192.329	195.177	188.848
505.395	17.0997	0	10.7339	101.835	96.3855	116.867	243.661	228.974	216.044	208.217	225.671	220.755	193.429	193.392	197.169
505.884	0	0.890638	0	102.897	101.487	132.392	239.743	225.003	223.28	215.844	209.821	206.863	196.142	200.198	195.564
506.373	5.86687	20.7582	3.27287	103.363	98.6668	120.745	236.148	224.459	212.132	228.308	222.462	220.951	186.829	188.248	184.908
506.862	14.8449	0	15.4274	102.05	77.9904	117.037	236.955	210.42	214.428	213.946	213.966	218.699	186.026	184.535	188.292
507.35	10.2591	13.3658	4.77394	99.4639	75.9509	129.806	239.369	233.829	215.622	210.568	210.773	212.694	187.233	185.837	191.48
507.839	19.7772	18.7205	22.1678	95.4245	93.2574	114.38	247.689	216.671	226.493	216.699	216.351	216.825	184.047	180.812	182.518
508.328	5.85115	21.7631	7.08442	117.06	93.8467	127	237.482	222.575	220.136	207.61	215.298	212.273	188.703	192.437	185.906
508.816	8.75887	13.8695	3.65332	91.6466	92.0191	119.63	228.433	219.563	206.401	189.695	215.588	215.17	181.21	179.048	178.618
509.305	19.1262	5.90217	21.6687	97.9938	90.4046	120.875	233.553	214.796	207.309	185.904	220.297	221.285	175.977	179.222	178.365
509.793	11.4574	0	14.0225	91.3386	92.7974	113.412	237.092	210.99	205.345	192.871	198.713	195.505	178.784	175.008	174.726
510.281	11.9925	0	5.99087	98.2926	86.3783	126.569	232.976	218.634	212.596	215.566	216.489	215.464	184.8	187.613	184.453
510.769	12.1701	0	12.215	99.1611	78.2031	116.724	228.989	219.107	207.089	212.954	213.879	209.279	181.471	181.599	177.219
511.257	0	0	0	92.1019	95.7338	108.885	230.696	218.677	213.728	209.444	215.264	214.877	175.611	170.841	171.078
511.745	0	27.7004	0	87.7525	90.0993	122.463	210.748	208.433	213.852	190.534	204.337	202.267	178.828	179.22	182.34
512.233	23.9231	11.1533	25.9649	99.8377	106.204	113.201	248.681	212.441	204.274	177.726	215.93	212.397	168.027	169.054	172.99
512.721	27.2784	0	24.6988	97.7232	94.3397	115.545	223.852	195.106	204.878	196.998	201.715	203.077	175.788	177.113	176.58
513.209	0	18.5627	1.85176	80.6957	80.4847	116.92	218.438	212.75	200.305	201.078	213.876	213.788	177.034	174.943	179.57
513.696	1.98161	0	0	90.4761	78.9947	114.681	224.106	210.983	189.749	191.23	199.532	203.863	180.695	182.772	184.833
514.184	4.14065	27.6659	0	96.671	80.5577	123.782	238.573	203.09	195.73	192.543	197.965	197.334	182.555	183.329	181.996
514.671	9.35554	0	8.16688	85.7168	77.638	110.938	242.821	198.275	205.656	203.201	207.893	209.814	163.747	164.943	164.5
515.158	0	13.8618	0.444442	92.0845	80.9911	125.778	220.153	197.423	198.885	179.366	207.217	207.982	182.319	180.377	186.49
515.646	1.25766	0	2.55212	90.2346	81.4696	105.936	229.834	212.22	200.712	180.672	196.131	200.753	168.546	164.716	167.537
516.133	7.54068	11.1072	4.20004	84.291	77.2976	102.094	227.742	208.835	193.767	193.096	201.549	203.315	157.666	156.006	158.103
516.62	7.35658	0	9.79835	94.5683	83.6871	114.763	226.022	196.841	189.173	183.122	199.275	200.309	164.739	166.309	166.488
517.107	0	7.22879	0	77.0488	77.7193	109.289	222.146	203.497	196.7	205.88	195.168	191.611	169.254	164.858	164.977
517.594	0	4.46422	0.525695	87.2202	75.2679	99.4442	202.337	189.881	201.005	178.899	190.192	187.715	158.416	158.755	156.16
518.081	7.68295	9.42971	6.15321	78.3863	76.5682	116.243	208.294	190.821	200.495	188.774	190.948	186.6	173.506	168.752	171.287
518.567	5.35298	0.878825	3.50555	85.5421	80.9107	107.349	212.202	211.837	195.953	179.611	200.305	201.731	161.685	156.959	162.631
519.054	0	18.5968	0.817977	89.5105	91.8282	105.086	212.999	191.055	196.257	192.748	189.044	187.483	175.562	173.578	173.214
519.541	0	0	0	79.9773	73.729	108.853	213.922	199.138	184.924	180.867	197.451	196.755	164.562	168.099	168.751
520.027	0	0	1.9203	76.2715	69.2965	104.234	213.078	193.626	193.307	177.152	194.096	193.049	156.034	157.267	157.331
520.513	0.355955	0	0	82.1442	85.1387	99.0714	212.009	192.396	198.827	184.307	188.073	187.808	158.25	156.005	155.58
521	2.13199	0	1.62458	79.8841	77.907	104.224	212.68	202.204	179.339	183.806	191.289	191.011	154.6	157.636	158.205
521.486	0	8.24521	0	75.4742	72.2398	97.6532	212.85	200.243	189.083	179.723	197.668	198.423	163.65	167.791	165.11
521.972	0	0	0	79.8815	75.0716	105.464	215.453	186.179	170.119	186.284	174.442	170.313	170.392	172.026	165.462
522.458	0	11.4802	0	96.3259	75.4998	92.7314	203.881	190.724	192.715	171.502	194.209	191.836	161.474	160.147	158.186
522.944	0	0	0	89.8562	77.8624	107.647	212.942	189.206	183.778	182.046	189.685	189.457	150.444	151.416	146.903
523.43	0	0	0	76.7061	71.2019	90.3106	203.913	184.969	194.385	184.369	172.582	176.142	151.235	151.811	146.829
523.915	0	0	0	84.4493	72.3024	98.0828	213.033	181.623	185.576	162.348	177.724	174.655	150.251	154.109	150.867
524.401	0	0	0.932439	77.581	75.2588	95.3933	202.065	187.727	192.883	182.36	178.172	174.492	153.003	152.057	155.154
524.887	0.529229	0	0	82.6463	67.3352	93.4386	208.934	190.524	194.436	173.523	175.151	171.537	161.086	157.843	165.778
525.372	0	0	0.179558	75.6141	79.9635	96.3996	206.441	189.746	171.673	184.728	178.428	178.74	148.517	145.208	143.998
525.857	0	0	2.8281	77.8553	76.4151	99.7042	199.455	171.65	195.333	173.558	179.581	179.625	153.206	152.708	156.667
526.343	0	0	0	74.3275	72.1712	89.8048	204.72	195.062	168.719	172.435	174.237	174.492	148.394	152.082	152.601
526.828	0	0	0	79.5452	64.0704	101.742	208.263	181.227	178.145	190.137	173.119	178.055	163.826	167.764	167.715
527.313	0	13.7356	0	91.187	72.9298	90.0503	197.462	175.78	188.373	172.392	174.548	174.756	152.385	152.347	154.756
527.798	0	0	0	77.1608	66.2055	86.1655	198.54	188.337	178.696	165.495	178.415	179.928	147.74	143.017	149.438
528.283	0	0	0	58.4428	76.1259	99.4866	201.463	181.046	184.304	162.271	177.674	174.339	151.92	155.148	153.579
528.768	0	14.8532	0.441439	69.4969	64.1407	107.434	192.809	179.445	174.421	178.332	179.431	183.859	146.968	148.274	142.645
529.253	0	10.7375	0	77.4736	70.2037	95.5164	197.334	176.614	179.72	165.612	177.319	176.096	155.783	158.969	154.766
529.737	0	0	0	67.4187	76.7067	90.0357	198.596	179.454	174.241	162.047	175.196	172.365	153.259	153.28	149.865
530.222	0	0	0	68.9381	72.936	88.2284	194.574	184.905	172.397	175.968	181.506	183.474	145.876	143.248	150.813
530.707	0	16.7819	0	63.5466	66.4634	83.355	190.279	194.921	181.467	169.425	166.279	171.054	161.326	160.603	162.599
531.191	0	0	0	45.5437	64.5167	94.3784	193.418	193.147	171.186	165.525	179.596	182.251	157.78	153.065	155.811
531.675	0	0	0	75.7787	64.7622	83.9284	192.225	180.549	172.67	176.949	167.956	171.317	153.258	152.351	158.005
532.159	0	2.13747	0.265564	64.8398	66.3417	93.8466	187.673	179.624	164.314	172.128	178.374	179.815	151.809	151.137	147.654
532.644	0	0	0	89.2304	64.578	86.2844	178.977	180.49	161.761	179.548	162.536	160.309	152.95	155.5	154.663
533.128	0	0	0	73.1395	66.3243	90.7589	199.449	183.758	164.974	164.631	169.669	172.217	147.057	146.225	146.089
533.612	0	5.21847	0	69.6456	70.1066	84.7547	190.331	173.331	179.334	156.9	167.47	164.558	146.801	142.684	143.393
534.095	0	0	0	65.7605	66.5618	94.5881	182.861	185.712	155.859	176.727	164.832	168.968	137.376	140.013	133.668
534.579	0	0	0.760613	75.555	56.3192	99.412	187.25	179.137	174.614	159.686	181.622	184.414	142.302	144.214	144.807
535.063	0	0	0	86.7401	71.306	105.3	186.776	187.766	163.327	161.563	164.281	164.906	134.428	138.532	132.808
535.546	0	10.2162	0	81.209	61.1543	103.274	195.348	174.81	165.524	143.337	164.348	163.485	149.264	153.907	151.804
536.03	0	0	0	61.3969	54.3835	103.03	184.097	152.259	165.595	156.025	165.307	163.766	132.831	130.786	133.039
536.513	0	3.77886	0	74.0853	60.3947	88.8018	184.93	186.593	168.93	166.11	166.161	169.468	139.729	144.358	136.218
536.997	0	0	1.42779	65.2529	62.3308	76.3547	181.766	172.493	169.607	157.029	165.419	167.568	143.607	140.545	145.867
537.48	0	0	2.62789	83.4086	57.6652	75.4404	181.957	161.245	156.806	141.521	149.052	151.684	133.401	130.393	131.83
537.963	0	0	2.91997	57.0165	53.8702	85.0417	195.061	165.324	161.927	157.305	159.5	160.333	139.552	136.735	142.042
538.446	0	0	0	58.9447	62.9166	88.7562	188.194	173.488	167.387	155.65	150.371	154.432	144.672	145.595	147.469
538.929	0	0	0	56.9676	65.0152	97.9724	192.453	173.04	171.922	160.018	168.256	169.716	140.322	135.358	138.053
539.412	0	4.48081	0	71.0196	60.3105	83.4246	174.945	174.22	156.764	156.235	168.371	172.596	138.878	135.451	135.712
539.895	0	0	0	71.9655	58.2669	82.7597	185.096	157.564	168.392	159.36	159.238	154.913	137.415	140.001	140.581
540.377	0	0	0	58.1654	59.2867	86.4268	176.105	160.119	155.871	153.57	162.313	161.774	141.219	141.933	138.962
540.86	0	0	0	62.8941	59.9657	87.4495	188.345	156.486	162.701	142.33	159.401	159.593	134.235	136.94	136.267
541.342	0	0	0	60.8116	61.2357	86.7851	183.233	164.751	174.653	149.675	160.901	164.555	139.628	136.943	135.224
541.825	0	16.2115	0	68.4545	48.7152	90.5961	178.187	163.657	161.341	141.293	169.742	168.024	127.859	130.347	130.723
542.307	0	0	2.29623	62.6447	61.4819	62.7191	178.049	163.334	148.959	145.227	155.761	159.842	130.016	134.85	130.917
542.789	0	11.9058	0	55.5741	56.5086	84.3772	176.098	160.449	156.019	153.538	153.599	153.359	129.455	132.696	125.096
543.272	0	0	0	57.3249	60.5687	82.759	163.717	157.207	158.109	158.826	160.478	160.468	138.834	139.944	138.552
543.754	0	10.9734	1.66903	61.0139	58.429	69.9549	165.588	158.058	152.754	154.706	154.588	152.541	126.73	123.439	125.653
544.236	0	12.3499	0	59.1838	57.8326	78.2116	175.294	161.436	153.644	153.646	142.373	139.633	126.942	127.276	123.766
544.717	0	0	0	65.2152	52.949	76.1048	168.008	167.316	150.857	145.904	152.685	152.438	125.267	127.013	124.308
545.199	0	4.77528	0	52.3188	60.6404	80.254	164.861	167.11	152.436	140.779	152.85	149.909	131.652	128.733	135.661
545.681	0	0	0	71.0999	55.1722	63.6335	174.191	169.935	139.371	143.066	144.899	145.237	130.407	133.463	131.716
546.163	0	11.3401	0	53.1861	51.8161	71.0478	172.092	155.915	139	147.462	150.879	149.943	122.792	118.255	120.399
546.644	0	15.3491	0.379469	57.3832	50.9209	72.0885	159.077	157.998	134.906	130.826	148.368	145.417	129.294	127.091	131.904
547.125	0	0	0	60.0089	57.2578	74.2007	170.989	151.782	137.184	136.637	149.057	153.785	114.974	113.73	118.4
547.607	0	0	0	68.8068	50.0525	65.5675	170.532	150.951	147.816	139.689	157.228	152.912	134.626	131.221	139.266
548.088	0	-0.818	0	57.5884	49.5369	74.9542	161.754	157.194	141.151	140.256	133.794	131.129	118.227	120.356	117.08
548.569	0	0	0	17.7303	62.5727	77.0638	158.616	149.727	154.36	142.353	141.186	139.197	128.987	132.655	128.261
549.05	0	0	0.658075	50.9034	48.4667	68.926	151.854	162.114	157.872	143.222	139.23	142.292	130.917	132.327	130.687
549.531	0	5.69836	0	59.8741	41.4299	72.4833	174.912	141.96	149.628	124.011	145.452	149.4	113.992	115.839	115.793
550.012	0	0	2.04037	56.2014	46.731	71.6178	160.594	155.825	128.488	140.476	141.958	140.631	109.602	114.28	107.126
550.493	0	2.74351	2.21221	39.4452	54.9196	70.7823	162.549	143.51	143.935	134.049	146.284	149.231	116.815	121.374	115.514
550.974	0	0	1.43913	50.7484	50.9547	67.835	165.013	148.549	141.916	134.863	138.102	142.653	125.587	129.283	129.192
551.454	0	14.8308	0.836065	54.407	45.3186	67.4625	165.826	155.568	134.138	134.646	144.568	141.291	108.293	112.067	111.817
551.935	0	14.3897	0	48.9735	40.743	69.2093	169.238	148.827	144.48	121.068	150.692	147.843	111.967	110.605	110.506
552.415	0	1.26068	0	45.6134	50.8875	78.1275	157.564	137.593	138.919	138.377	136.163	139.977	120.496	122.268	118.783
552.895	0	10.249	0	60.239	54.3479	63.4652	163.099	158.089	138.267	130.171	142.184	141.512	101.758	99.0822	102.567
553.376	0	0	0	46.6635	48.9589	68.8037	140.176	142.008	145.422	131.173	147.589	145.146	111.88	112.138	113.052
553.856	0	15.9497	0	42.0055	46.7453	66.9649	150.381	135.5	140.356	128.017	149.21	147.953	114.508	112.012	112.578
554.336	0	0	0	54.4304	48.8526	65.3769	148.652	146.449	128.392	126.781	123.869	119.877	117.147	116.883	120.132
554.816	0	0	0.015704	32.3567	43.3762	75.019	153.034	146.528	124.615	134.263	125.193	129.264	115.661	111.416	111.028
555.295	0	4.21412	0.605191	41.4402	49.1579	73.2378	158.161	143.664	134.597	106.782	141.682	143.102	124.957	126.182	124.405
555.775	0	8.93763	0	37.0677	41.7829	59.6799	155.916	138.012	132.66	113.64	129.373	128.072	111.754	113.61	112.515
556.255	0	3.14212	0	53.6889	43.0204	68.8482	150.261	125.86	127.766	126.683	124.828	128.787	111.776	115.306	109.633
556.735	0	0	1.64947	36.9151	45.3214	71.3422	161.182	134.034	130.103	117.405	129.1	130.744	113.758	118.624	110.256
557.214	0	7.3364	0	43.2405	50.0956	69.9766	155.59	134.824	147.601	116.421	123.197	127.143	100.966	97.4126	98.0839
557.693	0	0	0	37.6722	53.6592	69.5101	148.479	130.17	130.301	131.863	135.462	130.547	113.579	113.363	113.513
558.173	0	0	0.500077	51.8949	50.3455	66.5493	150.465	135.554	126.852	134.585	130.957	131.095	100.409	98.2708	96.9696
558.652	0	0	0.49286	40.4994	34.8549	66.0203	148.566	138.918	125.092	121.357	136.599	132.614	110.999	110.354	114.653
559.131	0	0	0	31.8987	40.4754	60.7057	148.865	131.975	118.36	126.962	134.265	130.314	110.788	113.59	110.642
559.61	0	0	0	44.8164	43.7682	66.4519	149.382	132.175	120.509	129.456	134.285	138.023	107.311	103.565	102.824
560.089	0	8.50863	0	52.4707	44.4302	60.0509	148.727	141.586	126.022	137.255	129.766	128.259	108.444	110.674	106.142
560.568	0	7.97802	1.08851	43.9059	50.2315	55.3029	147.883	128.538	128.85	113.337	133.826	133.028	115.852	118.252	113.016
561.047	0	0	0	43.3955	32.5032	66.2445	138.105	126.814	125.728	116.896	121.732	116.865	98.8064	101.717	97.4145
561.525	0	0	0	36.3036	41.0295	62.6868	147.059	130.997	115.439	126.16	127.475	123.451	116.507	116.522	120.283
562.004	0	0	0	49.7439	41.2982	64.5975	137.864	133.065	118.525	116.01	107.616	102.823	110.577	115.463	106.211
562.482	0	17.2732	0	40.952	41.8244	58.7526	144.78	122.411	132.822	117.593	122.45	125.062	112.691	109.863	108.212
562.961	0	0	2.35608	37.9611	47.6443	64.2334	139.401	139.431	126.63	124.656	124.207	125.832	104.191	105.661	106.827
563.439	0	0	0	38.8737	47.3325	48.5269	138.135	123.395	122.498	130.604	127.145	125.563	103.219	99.3997	103.396
563.917	0	0	0	37.1501	41.7206	64.1734	147.115	138.263	123.853	122.581	132.399	129.185	88.9632	85.1884	85.8904
564.395	0	0	0.560589	46.7004	43.7052	56.9572	134.747	131.63	119.539	118.792	127.028	128.811	98.9778	94.2939	97.3938
564.873	0	9.02569	0	40.7455	32.7643	53.9896	136.607	122.848	127.979	123.159	122.888	126.909	106.879	107.947	111.362
565.351	0	3.14413	0	34.0609	35.6169	58.2829	135.984	142.864	116.874	121.094	128.63	132.491	106.581	110.265	107.846
565.829	0	0	0	38.4881	34.2129	56.8839	134.472	125.1	123.839	114.037	131.344	128.965	87.6086	84.3153	87.1312
566.307	0	9.9241	0	31.9546	26.9439	63.1033	133.946	127.947	115.851	120.072	116.608	116.399	100.755	99.0583	104.42
566.784	0	0	0	42.712	33.8477	65.9292	136.343	143.054	116.174	112.225	127.931	126.957	89.18	87.5865	93.8674
567.262	0	18.5555	0	37.2701	38.6631	51.3979	136.973	120.168	124.786	116.401	120.752	119.156	99.7402	99.1064	104.347
567.74	0	0	2.29667	37.5092	41.7476	59.8563	140.863	111.617	118.949	115.349	120.597	116.301	97.2352	93.7506	101.394
568.217	0	9.35697	0.97334	27.9946	43.5859	61.5469	136.524	117.856	108.791	109.274	116.672	116.217	90.7747	88.9017	90.4203
568.694	0	17.9523	0	39.0237	29.5649	58.7586	140.872	126.941	122.995	107.255	131.426	128.901	105.339	106.921	102.01
569.171	0	10.348	0	39.426	36.1983	44.1668	140.342	118.669	116.362	116.319	107.303	105.698	84.1938	85.428	85.616
569.649	0	5.55572	0	36.634	36.4258	73.9496	134.048	127.087	123.31	111.287	100.833	100.611	86.6346	86.9377	86.4367
570.125	0	14.1561	0	36.6788	37.7218	54.1408	129.125	121.312	112.546	112.499	115.635	119.371	100.899	97.5357	104.385
570.602	0	10.8147	0.169657	32.6122	47.0594	56.7002	131.169	126.634	113.719	124.251	120.394	119.685	86.6373	84.2265	86.1975
571.079	0	0	0	17.3032	39.7621	42.5669	127.431	111.274	105.585	109.836	117.284	122.183	90.4929	93.1276	90.937
571.556	0	10.5569	0.797733	33.2298	27.0865	42.6317	135.195	120.46	97.6667	124.742	117.822	122.409	101.78	102.888	99.7053
572.033	0	6.50441	2.25455	33.4562	36.1071	53.6809	127.278	111.783	111.65	122.76	116.731	117.972	97.603	97.3455	99.9831
572.509	0	0	0	40.4413	40.426	54.7721	123.952	117.945	108.974	107.12	122.15	126.154	87.8953	83.0485	90.8376
572.986	0	17.2857	0	38.4802	39.3554	69.5593	134.381	118.871	97.1237	96.5166	107.239	104.569	96.3788	98.4524	94.2242
573.462	0	0	0	34.227	48.5804	53.5872	131.369	116.124	117.953	117.73	113.317	115.043	93.6121	93.488	89.9117
573.938	0	0	0.881535	29.6053	36.7517	66.4818	119.336	126.051	115.759	104.521	110.394	113.129	92.8279	91.2635	89.2067
574.414	0	14.5196	0	40.9481	30.1146	51.898	127.413	122.727	103.596	99.1996	111.582	110.835	93.4586	95.7059	89.4257
574.89	0	12.4606	0	38.2888	41.6932	59.7276	118.672	104.33	121.032	106.704	107.707	103.278	94.9905	93.0718	97.4167
575.366	0	10.6087	2.6192	31.6719	32.8848	56.1685	124.12	118.248	110.674	103.742	102.397	103.281	95.9991	96.0314	100.675
575.842	0	18.1712	0	17.6555	36.1782	50.9718	133.492	102.561	107.541	112.016	109.939	108.358	77.0678	76.9318	79.8094
576.318	0	0	0	23.6245	37.6632	58.4678	140.201	114.497	115.623	102.694	110.775	107.894	83.4985	85.1602	80.9937
576.794	0	0	0.701356	32.6723	43.4984	50.7077	135.353	111.507	109.565	114.959	94.728	91.2189	81.0336	77.3828	81.0473
577.269	0	0	0	67.9508	39.0128	45.49	123.937	104.888	110.6	93.6381	102.106	102.312	86.767	85.1031	87.6984
577.745	0	0	0	28.592	22.5305	56.483	122.497	119.093	113.476	105.233	105.335	102.715	99.451	97.1813	98.4045
578.22	0	0	0.180288	19.5705	38.2085	67.872	111.059	89.99	112.902	88.4217	115.316	114.948	80.6177	79.0751	82.3472
578.695	0	0	0	42.2805	47.3717	52.2539	124.623	118.505	114.336	91.8312	102.707	104.458	91.8716	89.3376	90.8532
579.171	0	11.7778	0	32.1607	39.9538	62.3844	122.817	112.792	107.73	93.0483	99.1881	103.784	84.4936	88.7173	82.8117
579.646	0	14.3618	0	42.2032	40.7309	57.5117	120.989	123.573	107.49	102.857	102.961	104.518	88.6201	88.2478	88.9514
580.121	0	0	0	26.402	29.2517	48.9496	125.409	105.678	112.715	109.183	108.184	103.454	87.9709	84.7873	85.0829
580.596	0	15.8721	0.820607	14.207	27.9808	54.2834	121.501	104.793	99.5722	111.05	104.373	106.252	79.3823	80.3045	81.2365
581.071	0	0	1.43392	33.7123	24.3349	51.1905	124.253	99.8772	96.5072	88.186	105.523	109.08	72.0839	68.3448	74.8694
581.545	0	2.38563	0	27.0084	30.966	50.8963	119.935	108.493	104.898	98.4103	96.6841	94.6641	82.1059	81.2386	80.1641
582.02	0	0	0.000628	29.6047	19.4497	56.4877	128.927	115.839	101.739	94.5035	118.315	117.03	88.475	88.2941	91.7
582.495	0	0	2.29639	23.7763	29.5657	46.4056	112.092	104.304	87.6701	97.7088	96.5311	97.4788	85.6018	89.9168	81.5827
582.969	0	0	0	18.8535	31.6115	49.3922	118.857	110.855	95.4673	102.208	98.634	94.7642	83.4608	83.2942	85.8998
583.443	0	9.09089	0.580575	26.54	41.3502	36.6738	109.653	105.307	107.786	100.178	98.2611	101.396	93.0367	89.3038	95.3749
583.918	0	0	0	30.1974	33.2603	46.8046	112.706	101.232	96.0039	102.008	91.9947	87.9976	77.3685	78.3001	73.5714
584.392	0	0.425138	2.91601	27.6693	40.4768	35.239	113.568	94.6981	102.015	96.2344	109.609	110.037	83.7349	82.7118	88.5218
584.866	0	18.1317	0	33.0332	34.8259	39.3575	108.496	92.9892	98.481	91.7642	101.841	101.376	87.3713	88.2277	91.9727
585.34	0	16.3447	0	10.1098	30.4528	32.3883	114.105	105.014	99.3794	102.269	94.0603	93.1353	79.9272	80.4418	80.8369
585.814	0	2.68781	1.78079	32.5892	46.402	47.2727	113.024	109.649	111.756	83.7294	91.9951	88.5017	91.1792	86.6717	89.5792
586.288	0	9.56948	0	20.2687	29.9716	41.3721	123.823	103.967	100.361	101.776	100.957	99.5754	76.9681	77.8665	79.0209
586.761	0	0	0	34.6476	25.7212	45.2766	120.759	95.4296	95.1943	100.682	91.527	94.3259	85.3301	90.1132	87.3543
587.235	0	11.3075	0	29.8867	42.7894	49.7813	112.522	89.1966	97.1464	100.044	87.1701	86.2209	70.0057	70.5613	71.4763
587.708	0	0	0	11.09	25.9818	50.9917	105.631	105.782	94.1717	86.843	94.767	95.4135	72.5561	67.8286	71.4502
588.182	0	0	0	6.47697	28.4287	47.3267	110.499	107.218	100.422	84.3413	95.8116	94.4613	73.2025	71.482	77.8614
588.655	0	5.74779	0	14.9915	25.8307	43.6058	113.796	96.7698	87.4159	103.904	98.6149	102.492	80.8498	76.6765	81.5484
589.128	0	-0.53188	0	28.3279	29.7443	34.4876	115.846	101.104	89.1232	96.1193	104.236	105.499	72.1212	76.0129	68.9705
589.602	0	0	0	32.62	38.7076	57.1034	115.052	103.454	92.3816	85.5899	88.3196	86.2835	64.3606	68.3228	60.9029
590.075	0	0	0	1.85522	35.765	38.2929	107.67	96.8135	102.539	99.4857	81.5049	82.5259	73.0132	75.9591	73.9192
590.548	0	18.3166	1.8285	15.9656	30.5698	44.8608	109.937	101.001	92.907	92.8285	93.131	92.9084	82.9658	86.6934	84.6645
591.02	0	3.94004	0.700235	18.5776	37.6794	34.6044	105.072	95.6338	95.3991	81.1183	90.5816	90.885	78.9101	76.7482	82.2906
591.493	0	4.8629	2.27258	24.556	21.4805	50.1982	100.45	81.306	97.0252	99.9457	96.129	94.3294	66.2853	66.9635	67.5886
591.966	0	0	0	23.6581	25.4377	42.9518	99.6689	93.827	90.98	82.4647	96.073	98.8495	77.4384	77.0766	77.6321
592.438	0	0	0	8.94714	39.1157	38.4739	116.627	83.1602	81.108	79.8897	93.6958	93.4848	66.0412	61.6865	67.8075
592.911	0	9.45164	0	16.4122	30.1489	42.2508	111.179	95.4425	86.4007	81.2475	88.3103	89.8255	78.2797	81.9818	73.3574
593.383	0	11.0444	0	20.538	24.7458	32.7103	96.2167	88.1986	88.5605	86.9731	90.2854	94.0097	75.5477	72.898	74.3013
593.856	0	8.00517	0	6.91679	30.5951	44.6088	92.2834	95.8555	85.8523	87.645	84.5712	86.9049	64.3515	65.8627	60.8718
594.328	0	-0.56832	0	18.3349	29.3047	45.0213	103.787	90.6448	86.1092	100.327	79.9369	83.1392	58.7537	58.8693	55.2189
594.8	0	11.7551	0	0	18.0447	53.1539	105.511	103.738	90.1125	85.1322	95.6065	98.7164	70.0953	74.1537	68.0308
595.272	0	12.1292	0	22.4892	22.2042	46.2304	101.564	85.6921	89.0812	82.02	95.5229	95.1295	57.7222	56.2279	56.5219
595.744	0	-0.15088	0.297963	29.0907	33.1662	42.5181	96.7179	80.7015	80.1574	87.0485	98.303	98.879	70.8406	67.3018	68.8841
596.216	0	-0.692	0	16.1563	30.5577	41.2353	101.254	87.2271	85.3325	82.2188	100.287	105.148	70.7203	75.2195	75.3223
596.687	0	0	0	14.0955	27.1733	44.0904	98.5175	93.1431	69.6912	79.983	101.461	98.9814	63.5605	63.0471	62.8507
597.159	0	0	0	21.9984	16.2355	54.7107	100.783	87.6794	87.8599	65.8299	84.8709	86.6148	72.861	74.9072	70.9037
597.63	0	9.30807	0	27.8404	21.9096	30.8725	98.2366	94.3672	80.5298	85.7336	89.0723	85.3323	63.8078	66.7661	65.6005
598.102	0	0	0.899399	23.1539	21.358	28.9988	105.169	87.5934	80.7757	81.6274	81.3759	81.7933	73.3264	73.1343	73.0512
598.573	0	0	0.156089	16.2134	39.941	36.2558	93.4385	86.0129	77.6768	72.077	71.264	66.683	63.7593	66.0159	67.3934
599.044	0	0	0	26.054	25.0225	35.9275	93.5722	82.8963	81.3927	60.9732	93.383	94.1041	65.9408	66.2221	69.3802
599.516	0	0	0	30.6065	22.0049	40.3277	97.1745	80.0937	83.538	79.0734	94.7777	91.1811	62.5639	64.1035	61.5252
599.987	0	14.0676	0	17.2045	21.071	39.7848	92.7713	84.5387	86.0661	79.509	76.2172	77.1382	55.9472	57.7683	56.7542
600.458	0	0	0	18.1449	30.7441	38.4419	98.8922	90.4301	83.3838	82.34	87.2176	90.1764	69.4395	70.3367	69.7236
600.458	0	0	0	18.1449	30.7441	38.4419	98.8922	90.4301	83.3838	82.34	87.2176	90.1764	69.4395	70.3367	69.7236

## Sheet: 2F
1																										IC50 Values
With radiation													Without Irradiation														1	2	1+irradiation	2+Irradiation
Raw Intensity				Blank Substracted				Normalized					Raw Intensity				Blank Substracted				Normalized data					Set 1	154.2	97.9	52.81	41.95
	Set 1	Set 2	Set 3		Set 1	Set 2	Set 3		Set 1	Set 2	Set 3			Set 1	Set 2	Set 3		Set 1	Set 2	Set 3		Set 1	Set 2	Set 3		Set 2	160	100	60	46.5
0	272	270	305	0	166	162	199	#NUM!					0	280	264	282	0	172	160	176	#NUM!					Set 3	125	90.2	48	50
1	248	239	268	1	142	131	162	0	1	1	1		1	245	241	244	1	137	137	138	0	1	1	1
5	234	238	247	5	128	130	141	0.69897	0.901408	0.992366	0.87037		5	240	237	239	5	132	133	133	0.69897	0.963504	0.970803	0.963768
7	236	227	227	7	130	119	121	0.845098	0.915493	0.908397	0.746914		7	232	234	231	7	124	130	125	0.845098	0.905109	0.948905	0.905797
10	222	226	223	10	116	118	117	1	0.816901	0.900763	0.722222		10	231	231	231	10	123	127	125	1	0.89781	0.927007	0.905797
50	212	218	215	50	106	110	109	1.69897	0.746479	0.839695	0.67284		50	230	229	228	50	122	125	122	1.69897	0.890511	0.912409	0.884058
100	207	209	215	100	101	101	109	2	0.711268	0.770992	0.67284		100	227	227	227	100	119	123	121	2	0.868613	0.89781	0.876812
200	193	196	211	200	87	88	105	2.30103	0.612676	0.671756	0.648148		200	227	227	224	200	119	123	118	2.30103	0.868613	0.89781	0.855072
1000	190	193	202	1000	84	85	96	3	0.591549	0.648855	0.592593		1000	224	225	223	1000	116	121	117	3	0.846715	0.883212	0.847826
10000	178	189	201	10000	72	81	95	4	0.507042	0.618321	0.58642		10000	223	221	218	10000	115	117	112	4	0.839416	0.854015	0.811594
100000	175	188	200	100000	69	80	94	5	0.485915	0.610687	0.580247		100000	220	214	217	100000	112	110	111	5	0.817518	0.80292	0.804348
150000	175	186	160	150000	69	78	54	5.17609	0.485915	0.59542	0.333333		150000	214	210	215	150000	106	106	109	5.17609	0.773723	0.773723	0.789855
200000	171	189	203	200000	65	81	97	5.30103	0.457746	0.618321	0.598765		200000	208	206	205	200000	100	102	99	5.30103	0.729927	0.744526	0.717391
Blank	106	108	106										Blank	108	104	106
2
With Radiation													Without Radiation
Raw Intensity				Blank Substracted				Normalized					Raw Data				Blank Substracted				Normalized
	Set 1	Set 2	Set 3		Set 1	Set 2	Set 3		Set 1	Set 2	Set 3			Set 1	Set 2	Set 3		Set 1	Set 2	Set 3		Set 1	Set 2	Set 3
0	220	216	257	0	143	134	163	#NUM!					0	270	255	286	0	209	181	220
1	221	212	196	1	144	130	102	0	1	1	1		1	249	254	231	1	188	180	165	0	1	1	1
5	218	207	187	5	141	125	93	0.69897	0.979167	0.961538	0.911765		5	239	242	226	5	178	168	160	0.69897	0.946809	0.933333	0.969697
7	208	202	180	7	131	120	86	0.845098	0.909722	0.923077	0.843137		7	238	240	217	7	177	166	151	0.845098	0.941489	0.922222	0.915152
10	175	186	170	10	98	104	76	1	0.680556	0.8	0.745098		10	232	230	206	10	171	156	140	1	0.909574	0.866667	0.848485
50	162	173	166	50	85	91	72	1.69897	0.590278	0.7	0.705882		50	230	225	198	50	169	151	132	1.69897	0.898936	0.838889	0.8
100	105	104	134	100	28	22	40	2	0.194444	0.169231	0.392157		100	218	200	194	100	157	126	128	2	0.835106	0.7	0.775758
200	102	103	105	200	25	21	11	2.30103	0.173611	0.161538	0.107843		200	206	198	189	200	145	124	123	2.30103	0.771277	0.688889	0.745455
1000	101	96	103	1000	24	14	9	3	0.166667	0.107692	0.0882353		1000	200	181	184	1000	139	107	118	3	0.739362	0.594444	0.715152
10000	95	93	103	10000	18	11	9	4	0.125	0.0846154	0.0882353		10000	193	178	175	10000	132	104	109	4	0.702128	0.577778	0.660606
100000	94	87	101	100000	17	5	7	5	0.118056	0.0384615	0.0686275		100000	182	176	174	100000	121	102	108	5	0.643617	0.566667	0.654545
150000	94	87	100	150000	17	5	6	5.17609	0.118056	0.0384615	0.0588235		150000	174	175	164	150000	113	101	98	5.17609	0.601064	0.561111	0.593939
200000	94	86	98	200000	17	4	4	5.30103	0.118056	0.0307692	0.0392157		200000	171	162	162	200000	110	88	96	5.30103	0.585106	0.488889	0.581818
Blank	77	82	94										Blank	61	74	66

## Sheet: 2G
Raw intensity								Normalized data								Kobs(sec-1)
Time(s)	1			2				Time(s)	1			2					1	2
	Set 1	Set 2	Set 3	Set 1	Set 2	Set 3			Set 1	Set 2	Set 3	Set 1	Set 2	Set 3		Set 1	1.671	0.8623
0	11985	11988	11969	13602	13586	13590		0	1	1	1	1	1	1		Set 2	0.843	0.8591
1	8310	9304	9303	7853	7866	7868		1	0.693367	0.776109	0.777258	0.577342	0.578978	0.578955		Set 3	0.8422	0.8581
2	7521	8517	8521	4213	4215	4226		2	0.627534	0.71046	0.711922	0.309734	0.310246	0.310964
3	7396	8395	8401	3090	3081	3106		3	0.617105	0.700284	0.701897	0.227172	0.226778	0.22855
5	7444	8444	8447	3034	3015	3018		5	0.62111	0.704371	0.70574	0.223055	0.22192	0.222075
10	7297	8289	8303	2986	2972	2982		10	0.608844	0.691441	0.693709	0.219527	0.218755	0.219426
20	7794	7800	7798	2678	2848	2663		20	0.650313	0.650651	0.651516	0.196883	0.209628	0.195953
30	7677	7672	7681	2510	2665	2516		30	0.640551	0.639973	0.641741	0.184532	0.196158	0.185136
60	7213	7209	7221	2445	2494	2456		60	0.601836	0.601351	0.603309	0.179753	0.183571	0.180721
120	7201	7192	7205	2837	2445	2840		120	0.600834	0.599933	0.601972	0.208572	0.179965	0.208977

## Sheet: 2H
Repeat 1
Aβ42 only	5.451	97.437	28	157	531.169	4895253
Aβ42+1	5.451	99.23	35	158	540.94	4985304
Aβ42 only + 2	5.451	111.288	38	158	606.674	5591110
Aβ42+1+irradiation	5.451	131.653	60	170	717.692	6614253
Aβ42+2+irradiation	5.451	120.21	39	164	655.313	6039367
Repeat 2
Aβ42 only	5.839	74.822	0	158	436.854	4026042
Aβ42+1	5.839	92.538	18	161	540.289	4979301
Aβ42 only + 2	5.839	103.778	24	157	605.91	5584062
Aβ42+1+irradiation	5.839	117.85	12	175	688.074	6341287
Aβ42+2+irradiation	5.839	134.052	25	175	782.666	7213046
										Repeat 1 Inverted Background Substracted	Repeat 2 Background Substracted

## Sheet: 2I
	1				2				Aβ42 only				Aβ42+1				Aβ42+2				Aβ42+ 1 + Irradiation				Aβ42+2 + Irradiation
	Record 1	Record 2	Record 3	Average	Record 1	Record 2	Record 3	Average	Record 1	Record 2	Record 3	Average	Record 1	Record 2	Record 3	Average	Record 1	Record 2	Record 3	Average	Record 1	Record 2	Record 3	Average	Record 1	Record 2	Record 3	Average
0.4	0	0	0	0	0	0	0	0	0	0	0	0	0	0	0	0	0	0	0	0	0	0	0	0	0	0	0	0
0.463	0	0	0	0	0	0	0	0	0	0	0	0	0	0	0	0	0	0	0	0	0	0	0	0	0	0	0	0
0.536	19.4	21.3	0	13.6	19.7	0	20.1	13.2	0	0	0	0	0	0	0	0	0	0	0	0	0	0	0	0	0	3.64	11.8	5.15
0.621	43.7	46.2	0	30	44.2	0	44.6	29.6	0	0	0	0	0	0	0	0	0	0	0	0	0	0	0	0	0	14	30.6	14.8
0.719	29.9	28.5	0	19.5	29.8	0	29.4	19.8	0	0	0	0	0	0	0	0	0	0	0	0	0	0	0	0	0	23.2	29.3	17.5
0.833	6.32	3.79	0	3.37	5.85	0	5.44	3.76	0	0	0	0	0	0	0	0	0	0	0	0	0	0	0	0	0	23.3	15.7	13
0.965	0.708	0.131	0	0.28	0.508	0	0.509	0.339	0	0	0	0	0	0	0	0	0	0	0	0	0	0	0	0	0	17	7.49	8.15
1.12	0	0	0	0	0	0	0	0	0	0	0	0	0	0	0	0	0	0	0	0	0	0	0	0	0	10	3.22	4.42
1.29	0	0	0	0	0	6.46	0	2.15	0	0	0	0	0	0	0	0	0	0	0	0	0	0	0	0	4.12	5.11	1.26	3.5
1.5	0	0	0	0	0	21.7	0	7.23	0	0	0	0	0	0	0	0	0	0	0	0	0	0	0	0	15.1	2.32	0.451	5.95
1.74	0	0	0	0	0	29.8	0	9.94	0	0	0	0	0	0	0	0	0	0	0	0	0	0	0	0	23.8	0.949	0.145	8.31
2.01	0	0	0	0	0	23.1	0	7.68	0	0	0	0	0	0	0	0	0	0	0	0	0	0	0	0	22.9	0.353	0.0417	7.76
2.33	0	0	0	0	0	12	2.01e-05	3.99	0	0	0	0	0	0	0	0	0	0	0	0	0	0	0	0	16.2	0.119	0.0103	5.44
2.7	0	0	0	0	0	4.62	0.00012	1.54	0	0	0	0	0	0	0	0	0	0	0	0	0	0	0	0	9.43	0.0359	0.00208	3.16
3.12	1.01e-05	0	0	3.38e-06	0	1.42	0.000271	0.475	0	0	0	0	0	0	0	0	0	0	0	0	0	0	0	0	4.79	0.00942	0.000297	1.6
3.62	5.35e-05	3.54e-05	0	2.97e-05	0	0.431	0.000329	0.144	0	0	0	0	0	0	0	0	0	0	0	0	3.59	4.38	4.92	4.3	2.19	0.00204	2.19e-05	0.732
4.19	0.000111	0.000117	7.16	2.39	1.29e-05	0.203	0.00027	0.0679	0	0	0	0	0	0	0	0	0	0	0	0	15.5	17.5	17.4	16.8	0.92	0.000327	0	0.307
4.85	0.000125	0.000161	23.2	7.72	4.45e-05	0.143	0.000178	0.0479	0	0	0	0	0	0	0	0	0	0	0	0	27.3	28.6	26.4	27.4	0.357	2.88e-05	0	0.119
5.61	9.33e-05	0.000133	30.5	10.2	6.33e-05	0.0981	0.000101	0.0328	0	0	0	0	0	0	0	0	0	0	0	0	26.2	25.6	23.8	25.2	0.128	0	0	0.0427
6.5	5.42e-05	7.98e-05	22.6	7.54	5.05e-05	0.0568	5.06e-05	0.019	0	0	0	0	0	0	0	0	0	0	0	0	16.3	14.8	15.3	15.5	0.0426	0	0	0.0142
7.53	2.63e-05	3.84e-05	11.3	3.77	2.68e-05	0.0275	2.29e-05	0.0092	0	0	0	0	0	0	0	0	0	0	0	0	7.48	6.35	7.73	7.18	0.0129	0	0	0.0043
8.72	1.1e-05	1.53e-05	4.08	1.36	1.02e-05	0.0112	9.31e-06	0.00374	0	0	0	0	0	0	0	0	0	0	0	0	2.68	2.1	3.13	2.64	0.0035	0	0	0.00117
10.1	4.05e-06	5.08e-06	1.02	0.341	2.72e-06	0.00376	3.36e-06	0.00125	0	0	0	0	0	0	0	0	0	0	0	0	0.74	0.528	1.01	0.758	0.000821	0	1.98e-09	0.000274
11.7	1.3e-06	1.34e-06	0.149	0.0498	4.47e-07	0.000994	1.06e-06	0.000332	0	0	0	0	0	0	0	0	0	0	0	0	0.144	0.092	0.242	0.159	0.000154	0	7.15e-09	5.14e-05
13.5	3.51e-07	2.6e-07	0.00639	0.00213	2.85e-08	0.000185	2.78e-07	6.19e-05	0	0	0	0	0	0	0	0	0	0	0	0	0.0151	0.00834	0.0369	0.0201	1.99e-05	0	1.14e-08	6.64e-06
15.7	7.63e-08	2.78e-08	0	3.47e-08	0	1.81e-05	5.6e-08	6.05e-06	0	0	0	0	0	0	0	0	0	0	0	0	0	0	0.00225	0.000751	1.19e-06	0	1.15e-08	3.99e-07
18.2	1.17e-08	9.73e-11	0	3.94e-09	0	0	7.17e-09	2.39e-09	0	0	0	0	0	0	0	0	0	0	0	0	0	0	0	0	0	0	9e-09	3e-09
21	9.31e-10	0	0	3.1e-10	0	0	3.23e-10	1.08e-10	0	0	0	0	0	0	0	0	0	0	0	0	0	1.65e-05	0	5.5e-06	0	0	6e-09	2e-09
24.4	0	0	0	0	0	0	0	0	0	0	0	0	0	8.33	9.42	5.92	0	0	0	0	0	5.84e-05	0	1.95e-05	0	0	3.59e-09	1.2e-09
28.2	0	1.64e-11	0	5.47e-12	0	0	0	0	0	0	0	0	0	25.7	27.9	17.9	0	0	3.23	1.08	0	8.92e-05	0	2.97e-05	0	0	1.99e-09	6.63e-10
32.7	0	6.05e-11	0	2.02e-11	0	0	7.38e-12	2.46e-12	0	0	6.9	2.3	0	31.5	32.2	21.2	0	0	18.7	6.25	0	8.3e-05	0	2.77e-05	0	0	1.04e-09	3.46e-10
37.8	2.29e-12	9.53e-11	2.98e-06	9.92e-07	0	0	2.75e-11	9.17e-12	0	0	21.7	7.24	0	21.3	19.8	13.7	0	9.24	35.4	14.9	0	5.74e-05	0	1.91e-05	0	0	5.19e-10	1.73e-10
43.8	8.39e-12	8.9e-11	1.1e-05	3.66e-06	0	9.04e-10	4.5e-11	3.16e-10	0	2.62	27.9	10.2	0	9.5	7.97	5.82	2.98	29.6	29.4	20.7	0	3.3e-05	0	1.1e-05	0	0	2.5e-10	8.32e-11
50.7	1.35e-11	5.98e-11	1.71e-05	5.7e-06	0	7.13e-09	4.55e-11	2.39e-09	0	10.8	20.9	10.6	6.89	2.95	2.16	4	14.8	35.8	11.3	20.6	0	1.69e-05	5.56e-07	5.81e-06	0	0	1.17e-10	3.89e-11
58.8	1.36e-11	3.29e-11	1.53e-05	5.11e-06	0	1.74e-08	3.44e-11	5.82e-09	0	19.5	11.4	10.3	21.9	0.588	0.355	7.63	28.3	20	1.87	16.7	0	8.1e-06	2.14e-06	3.41e-06	0	0	5.34e-11	1.78e-11
68.1	1.05e-11	1.63e-11	9.45e-06	3.15e-06	0	2.12e-08	2.17e-11	7.08e-09	0	21.3	5.26	8.84	28.8	0.0564	0.0232	9.61	28.1	4.93	0	11	5.45e-08	3.9e-06	3.61e-06	2.52e-06	0	0	2.4e-11	8e-12
78.8	6.87e-12	7.86e-12	4.44e-06	1.48e-06	0	1.64e-08	1.21e-11	5.46e-09	4.71	17	2.3	8	22	0	0.000392	7.34	16.8	0.337	0	5.71	2.64e-07	2.03e-06	3.74e-06	2.01e-06	0	0	1.07e-11	3.56e-12
91.3	4.08e-12	4.01e-12	1.64e-06	5.47e-07	2.9e-13	9.57e-09	6.18e-12	3.19e-09	15.7	11.4	1.13	9.41	12.1	0	0.00476	4.04	6.72	0	0	2.24	5.48e-07	1.19e-06	2.88e-06	1.54e-06	0	0	4.74e-12	1.58e-12
106	2.3e-12	2.27e-12	4.65e-07	1.55e-07	1.15e-12	4.56e-09	2.97e-12	1.52e-09	22.6	6.87	0.681	10.1	5.14	0.000207	0.0137	1.72	1.72	0	0	0.572	6.84e-07	7.7e-07	1.87e-06	1.11e-06	0	0	2.12e-12	7.05e-13
122	1.27e-12	1.41e-12	9.09e-08	3.03e-08	1.91e-12	1.82e-09	1.37e-12	6.08e-10	20.6	3.99	0.478	8.34	1.68	0.0029	0.0196	0.567	0.215	0	0	0.0715	6.31e-07	5.27e-07	1.1e-06	7.51e-07	0	0	9.64e-13	3.21e-13
142	7.2e-13	9.47e-13	8.97e-09	2.99e-09	1.79e-12	5.97e-10	6.23e-13	2e-10	14.9	2.33	0.357	5.86	0.383	0.00921	0.0189	0.137	0	0	0	0	5.05e-07	3.74e-07	6.17e-07	4.99e-07	0	5.79e-17	4.59e-13	1.53e-13
164	4.38e-13	6.81e-13	0	3.73e-13	1.09e-12	1.47e-10	2.93e-13	4.94e-11	9.75	1.47	0.279	3.83	0.0607	0.0152	0.0154	0.0305	0	0	0	0	3.88e-07	2.79e-07	3.57e-07	3.41e-07	0	1.87e-15	2.36e-13	7.94e-14
190	2.91e-13	5.11e-13	0	2.67e-13	4.35e-13	2.03e-11	1.48e-13	6.96e-12	6.05	0.999	0.223	2.42	0.0744	0.0172	0.0114	0.0343	0	0	0	0	2.95e-07	2.16e-07	2.21e-07	2.44e-07	0	7.46e-15	1.34e-13	4.7e-14
220	1.94e-13	3.61e-13	2.2e-09	7.34e-10	8.69e-14	1.98e-12	7.84e-14	7.16e-13	3.33	0.677	0.166	1.39	0.159	0.0146	0.00745	0.0603	0	0	0	0	2.07e-07	1.58e-07	1.37e-07	1.68e-07	0	1.52e-14	7.6e-14	3.04e-14
255	1.25e-13	2.3e-13	8.94e-09	2.98e-09	0	1.24e-11	4.5e-14	4.15e-12	1.52	0.435	0.112	0.69	0.211	0.00971	0.00422	0.0749	0	0	0	0	1.32e-07	1.05e-07	8.48e-08	1.07e-07	0	2.18e-14	4.09e-14	2.09e-14
295	8.11e-14	1.36e-13	1.72e-08	5.74e-09	0	3.4e-11	3.26e-14	1.14e-11	0.584	0.277	0.0714	0.311	0.208	0.00524	0.00224	0.0718	0	0	0	0	7.96e-08	6.59e-08	5.6e-08	6.72e-08	2.88e-14	2.64e-14	2.2e-14	2.57e-14
342	5.46e-14	7.5e-14	2.21e-08	7.37e-09	0	5.71e-11	2.91e-14	1.9e-11	0.175	0.176	0.0439	0.132	0.168	0.00221	0.00121	0.0571	0	0	0	0	4.65e-08	3.97e-08	4.06e-08	4.23e-08	1.39e-13	2.93e-14	1.19e-14	6e-14
396	3.74e-14	3.67e-14	2.17e-08	7.24e-09	0	6.91e-11	2.8e-14	2.3e-11	0.0344	0.108	0.0253	0.0558	0.111	0.000643	0.000748	0.0376	0	0	0	0	2.58e-08	2.22e-08	3.11e-08	2.64e-08	3.3e-13	3.03e-14	6.43e-15	1.22e-13
459	2.53e-14	1.44e-14	1.72e-08	5.73e-09	0	6.68e-11	2.66e-14	2.23e-11	0.00256	0.0611	0.0131	0.0256	0.058	9e-05	0.000567	0.0196	0	0	0	0	1.3e-08	1.08e-08	2.39e-08	1.59e-08	5.48e-13	2.96e-14	3.31e-15	1.94e-13
531	1.74e-14	4.06e-15	1.12e-08	3.73e-09	0	5.5e-11	2.49e-14	1.83e-11	0	0.0317	0.00599	0.0126	0.022	0	0.000517	0.00751	0.00126	0	0.00109	0.000785	5.93e-09	4.44e-09	1.85e-08	9.63e-09	7.66e-13	2.86e-14	1.64e-15	2.65e-13
615	1.27e-14	5.93e-16	5.94e-09	1.98e-09	0	4.01e-11	2.37e-14	1.34e-11	0	0.0149	0.00233	0.00574	0.00503	0	0.000516	0.00185	0.0104	0.00208	0.00451	0.00567	2.39e-09	1.38e-09	1.47e-08	6.16e-09	1.01e-12	2.88e-14	7.93e-16	3.47e-13
712	9.96e-15	0	2.29e-09	7.63e-10	0	2.55e-11	2.29e-14	8.51e-12	0	0.00593	0.000691	0.00221	0.000425	0	0.000517	0.000314	0.0344	0.00978	0.00866	0.0176	7.83e-10	2.53e-10	1.19e-08	4.3e-09	1.31e-12	3.05e-14	3.69e-16	4.46e-13
825	8.04e-15	0	4.48e-10	1.49e-10	0	1.28e-11	2.15e-14	4.26e-12	0	0.00166	0.000109	0.000589	0	0	0.000478	0.000159	0.0667	0.0207	0.0106	0.0326	1.56e-10	6.98e-12	9.18e-09	3.12e-09	1.63e-12	3.26e-14	1.49e-16	5.53e-13
955	6.37e-15	0	0	2.12e-15	0	4.2e-12	1.88e-14	1.41e-12	0	0.000228	0	7.6e-05	0	0	0.000381	0.000127	0.0904	0.0261	0.00906	0.0419	3.39e-11	0	6.35e-09	2.13e-09	1.89e-12	3.37e-14	4.42e-17	6.43e-13
1110	4.86e-15	0	0	1.62e-15	0	6.36e-13	1.47e-14	2.17e-13	7.87e-05	0	0	2.62e-05	0	0	0.000247	8.22e-05	0.0941	0.0217	0.00533	0.0404	1.36e-10	0	3.69e-09	1.27e-09	2.06e-12	3.32e-14	6.73e-18	6.96e-13
1280	3.63e-15	0	0	1.21e-15	0	0	1.04e-14	3.47e-15	0.000852	0	0	0.000284	0	0	0.000122	4.07e-05	0.0782	0.0116	0.00196	0.0306	3.58e-10	0	1.69e-09	6.82e-10	2.11e-12	3.13e-14	0	7.13e-13
1480	2.3e-15	0	0	7.66e-16	0	0	5.84e-15	1.95e-15	0.00173	0	0	0.000578	0	0	4.08e-05	1.36e-05	0.0471	0.00348	0.000335	0.017	4.5e-10	0	5.39e-10	3.29e-10	1.66e-12	2.33e-14	0	5.61e-13
1720	8.55e-16	0	0	2.85e-16	0	0	1.86e-15	6.21e-16	0.0014	0	0	0.000467	0	0	6.76e-06	2.25e-06	0.015	0.000391	0	0.00514	2.61e-10	0	8.79e-11	1.16e-10	7.14e-13	9.66e-15	0	2.41e-13
1990	1.48e-16	0	0	4.95e-17	0	0	1.86e-16	6.21e-17	0.000739	0	0	0.000246	0	0	0	0	0.00119	0	0	0.000397	9.33e-11	0	0	3.11e-11	1.56e-13	1.96e-15	0	5.25e-14
2300	6.07e-17	0	0	2.02e-17	0	0	4.07e-17	1.36e-17	0.000527	0	0	0.000176	0	0	0	0	0.000108	0	0	3.59e-05	5.8e-11	0	0	1.93e-11	7.09e-14	8.49e-16	0	2.39e-14
2670	3.5e-17	0	0	1.17e-17	0	0	2.25e-17	7.5e-18	0.000413	0	1.9e-07	0.000138	0	0	0	0	0	0	0	0	4.34e-11	0	0	1.45e-11	4.21e-14	4.82e-16	0	1.42e-14
3090	2.43e-17	0	0	8.11e-18	0	0	2.86e-17	9.54e-18	0.000333	1.6e-06	9.71e-07	0.000112	0	0	0	0	0	0	0	0	3.53e-11	7.38e-13	1.43e-13	1.21e-11	2.85e-14	3.15e-16	0	9.6e-15
3580	1.86e-17	0	0	6.21e-18	0	0	3.99e-17	1.33e-17	0.000267	7.79e-06	2.48e-06	9.25e-05	5.68e-07	0	0	1.89e-07	0	0	0	0	2.96e-11	3.46e-12	1.85e-12	1.16e-11	2.05e-14	2.2e-16	0	6.91e-15
4150	1.55e-17	4.21e-18	0	6.58e-18	0	0	5.25e-17	1.75e-17	0.000219	1.91e-05	4.46e-06	8.08e-05	1.25e-05	0	1.36e-08	4.18e-06	0	0	0	0	2.6e-11	8.19e-12	7.36e-12	1.39e-11	1.58e-14	1.65e-16	0	5.32e-15
4800	1.38e-17	2.28e-17	0	1.22e-17	0	1.56e-14	6.53e-17	5.23e-15	0.000183	3.35e-05	6.59e-06	7.45e-05	5.37e-05	0	2.05e-07	1.8e-05	9.87e-06	0	0	3.29e-06	2.39e-11	1.4e-11	1.71e-11	1.83e-11	1.29e-14	1.32e-16	0	4.35e-15
5560	9.74e-18	3.3e-17	0	1.42e-17	0	3.12e-14	5.51e-17	1.04e-14	0.000122	3.29e-05	6e-06	5.36e-05	7.22e-05	0	3.69e-07	2.42e-05	1.97e-05	0	0	6.58e-06	1.71e-11	1.35e-11	1.88e-11	1.65e-11	8.6e-15	8.69e-17	0	2.9e-15
6440	3.16e-18	1.44e-17	0	5.85e-18	0	1.56e-14	1.94e-17	5.21e-15	3.83e-05	1.23e-05	2.17e-06	1.76e-05	3.04e-05	0	1.78e-07	1.02e-05	9.87e-06	0	0	3.29e-06	5.56e-12	5.03e-12	7.37e-12	5.99e-12	2.71e-15	2.72e-17	0	9.12e-16
7460	0	0	0	0	0	0	0	0	0	0	0	0	0	0	0	0	0	0	0	0	0	0	0	0	0	0	0	0
8630	0	0	0	0	0	0	0	0	0	0	0	0	0	0	0	0	0	0	0	0	0	0	0	0	0	0	0	0
