# Supplementary material for: Photolytic degradation of Alzheimer's amyloid Aβ42-fibrils by sialic acid decorated glycodendrimers
Source: Research Square preprint supplement (doi:10.21203/rs.3.rs-6562396/v1), 2025-05-07
Supplement: Supplementary file 7 [file Figure 4F.xlsx]

## Sheet: 4F
Fibril Height (nm)
Sl.no.	Aβ42 Only	Aβ42 +1	Aβ42 +2
1	1.51884	1.87231	1.27307
2	2.41281	1.96006	1.65393
3	2.01322	2.84257	3.23987
4	2.39286	3.41625	1.8588
5	3.14387	3.87924	1.80922
6	4.91207	1.71333	1.85099
7	2.42491	0.799672	1.59434
8	2.5601	0.604474	1.49338
9	5.72384	1.6032	1.36106
10	3.4739	2.16463	1.60168
