# Supplementary material for: Photolytic degradation of Alzheimer's amyloid Aβ42-fibrils by sialic acid decorated glycodendrimers
Source: Research Square preprint supplement (doi:10.21203/rs.3.rs-6562396/v1), 2025-05-07
Supplement: Supplementary file 10 [file Figure 5.xlsx]

## Sheet: 5A
Without Irradiation	1
	Absorbance				log[Concentration(uM)] vs Normalized data				log[Concentration(uM)] vs %viability
	Concentration(uM)	Set 1	Set 2	Set 3	log[Concentration(uM)]	Set 1	Set 2	Set 3	log[Concentration(uM)]	Set 1	Set 2	Set 3
	0	0.9675	0.963333	0.97087	#NUM!	1.05532	1.04144	1.0459	#NUM!	105.532	104.144	104.59
	1	0.916786	0.925	0.928261	0	1	1	1	0	100	100	100
	5	0.893571	0.83375	0.89913	0.69897	0.974679	0.901351	0.968618	0.69897	97.4679	90.1351	96.8618
	10	0.857143	0.785	0.896087	1	0.934944	0.848649	0.96534	1	93.4944	84.8649	96.534
	20	0.813214	0.785	0.825652	1.30103	0.887028	0.848649	0.889461	1.30103	88.7028	84.8649	88.9461
	50	0.808214	0.764167	0.781304	1.69897	0.881574	0.826126	0.841686	1.69897	88.1574	82.6126	84.1686
	100	0.761071	0.729167	0.718696	2	0.830152	0.788288	0.774239	2	83.0152	78.8288	77.4239
	200	0.722857	0.72625	0.669565	2.30103	0.788469	0.785135	0.721311	2.30103	78.8469	78.5135	72.1311
	2
	Absorbance				log[Concentration(uM)] vs Normalized data				log[Concentration(uM)] vs %viability
	Concentration(uM)	Set 1	Set 2	Set 3	log[Concentration(uM)]	Set 1	Set 2	Set 3	log[Concentration(uM)]	Set 1	Set 2	Set 3
	0	0.990357	0.979643	0.982857	#NUM!	1.11995	1.05785	1.17607	#NUM!	111.995	105.785	117.607
	1	0.884286	0.926071	0.835714	0	1	1	1	0	100	100	100
	5	0.87	0.798214	0.797857	0.69897	0.983845	0.861936	0.954701	0.69897	98.3845	86.1936	95.4701
	10	0.860714	0.782857	0.711429	1	0.973344	0.845353	0.851282	1	97.3344	84.5353	85.1282
	20	0.828929	0.779643	0.677143	1.30103	0.937399	0.841882	0.810256	1.30103	93.7399	84.1882	81.0256
	50	0.825714	0.775	0.675714	1.69897	0.933764	0.836868	0.808547	1.69897	93.3764	83.6868	80.8547
	100	0.605714	0.739643	0.658214	2	0.684976	0.798689	0.787607	2	68.4976	79.8689	78.7607
	200	0.585714	0.739643	0.630357	2.30103	0.662359	0.798689	0.754274	2.30103	66.2359	79.8689	75.4274
With irradiation	1
	Absorbance				log[Concentration(uM)] vs Normalized data				log[Concentration(uM)] vs %viability
	Concentration(uM)	Set 1	Set 2	Set 3	log[Concentration(uM)]	Set 1	Set 2	Set 3	log[Concentration(uM)]	Set 1	Set 2	Set 3
	0	0.9775	0.974167	0.975	#NUM!	1.03805	1.02185	1.00846	#NUM!	103.805	102.185	100.846
	1	0.941667	0.953333	0.966818	0	1	1	1	0	100	100	100
	5	0.839583	0.812917	0.905455	0.69897	0.891593	0.85271	0.93653	0.69897	89.1593	85.271	93.653
	10	0.824583	0.810417	0.882727	1	0.875664	0.850087	0.913023	1	87.5664	85.0087	91.3023
	20	0.785	0.736667	0.856818	1.30103	0.833628	0.772727	0.886225	1.30103	83.3628	77.2727	88.6225
	50	0.781667	0.7025	0.725909	1.69897	0.830088	0.736888	0.750823	1.69897	83.0088	73.6888	75.0823
	100	0.698333	0.664167	0.718636	2	0.741593	0.696678	0.7433	2	74.1593	69.6678	74.33
	200	0.61375	0.62875	0.668182	2.30103	0.65177	0.659528	0.691114	2.30103	65.177	65.9528	69.1114
	2
	Absorbance				log[Concentration(uM)] vs Normalized data				log[Concentration(uM)] vs %viability
	Concentration(uM)	Set 1	Set 2	Set 3	log[Concentration(uM)]	Set 1	Set 2	Set 3	log[Concentration(uM)]	Set 1	Set 2	Set 3
	0	0.971481	0.983226	0.976471	#NUM!	1.06108	1.04706	1.18065	#NUM!	106.108	104.706	118.065
	1	0.915556	0.939032	0.827059	0	1	1	1	0	100	100	100
	5	0.84	0.855161	0.731765	0.69897	0.917476	0.910684	0.88478	0.69897	91.7476	91.0684	88.478
	10	0.744815	0.695161	0.718529	1	0.813511	0.740295	0.868777	1	81.3511	74.0295	86.8777
	20	0.726667	0.62871	0.683529	1.30103	0.793689	0.669529	0.826458	1.30103	79.3689	66.9529	82.6458
	50	0.638148	0.617419	0.672647	1.69897	0.697006	0.657506	0.8133	1.69897	69.7006	65.7506	81.33
	100	0.637037	0.570323	0.664412	2	0.695793	0.607351	0.803343	2	69.5793	60.7351	80.3343
	200	0.595926	0.560645	0.559412	2.30103	0.65089	0.597046	0.676387	2.30103	65.089	59.7046	67.6387

## Sheet: 5B
	Absorbance								Cell Viability
		Only Cell	Cell+Aβ42	Cell+Aβ42+1	Cell+Aβ42+1+irradiation	Cell+Aβ42+2	Cell+Aβ42+2+irradiation			Only Cell	Cell+Aβ42	Cell+Aβ42+1	Cell+Aβ42+1+irradiation	Cell+Aβ42+2	Cell+Aβ42+2+irradiation
	Set 1	0.988263	0.7723	0.791549	0.992958	0.792488	1.06948		Set 1	100	78.1473	80.095	100.475	80.19	108.219
	Set 2	0.984977	0.782629	0.79108	0.953521	0.807981	1.05399		Set 2	100	79.4566	80.3146	96.8065	82.0305	107.007
	Set 3	0.976585	0.810732	0.810244	0.991707	0.876098	1.07561		Set 3	100	83.017	82.967	101.548	89.7103	110.14
