# Supplementary material for: Photolytic degradation of Alzheimer's amyloid Aβ42-fibrils by sialic acid decorated glycodendrimers
Source: Research Square preprint supplement (doi:10.21203/rs.3.rs-6562396/v1), 2025-05-07
Supplement: Supplementary file 13 [file Figure S1.xlsx]

## Sheet: Sheet1
Without Irradiation	1													With Irradiation	1
	Absorbance				log[Concentration(uM)] vs Normalized data				log[Concentration(uM)] vs %viability						Absorbance				log[Concentration(uM)] vs Normalized data				log[Concentration(uM)] vs %viability
	Concentration(uM)	Set 1	Set 2	Set 3	log[Concentration(uM)]	Set 1	Set 2	Set 3	log[Concentration(uM)]	Set 1	Set 2	Set 3			Concentration(uM)	Set 1	Set 2	Set 3	log[Concentration(uM)]	Set 1	Set 2	Set 3	log[Concentration(uM)]	Set 1	Set 2	Set 3
	0	2.0632	2.6976	2.54006	#NUM!	1.04657	1.00212	1.10265							0	2.74383	1.96728	2.14856	#NUM!	1.02327	1.03237	1.08872
	1	1.9714	2.6919	2.30359	0	1	1	1	0	100	100	100			1	2.68142	1.9056	1.97348	0	1	1	1	0	100	100	100
	5	1.9708	2.6853	2.29493	0.69897	0.999696	0.997548	0.996241	0.69897	99.9696	99.7548	99.6241			5	2.64691	1.90162	1.93786	0.69897	0.987127	0.997914	0.981953	0.69897	98.7127	99.7914	98.1953
	10	1.887	2.5958	2.26289	1	0.957188	0.9643	0.982333	1	95.7188	96.43	98.2333			10	2.62539	1.88729	1.90258	1	0.979103	0.990394	0.964072	1	97.9103	99.0394	96.4072
	20	1.8789	2.5578	2.2425	1.30103	0.953079	0.950184	0.973482	1.30103	95.3079	95.0184	97.3482			20	2.6273	1.88217	1.87441	1.30103	0.979817	0.987706	0.949797	1.30103	97.9817	98.7706	94.9797
	50	1.8542	2.5478	1.97683	1.69897	0.94055	0.946469	0.858153	1.69897	94.055	94.6469	85.8153			50	2.57723	1.86329	1.8981	1.69897	0.961143	0.977801	0.961805	1.69897	96.1143	97.7801	96.1805
	100	1.8145	2.4683	1.95144	2	0.920412	0.916936	0.847128	2	92.0412	91.6936	84.7128			100	2.48758	1.84762	1.85432	2	0.927709	0.969575	0.939618	2	92.7709	96.9575	93.9618
	200	1.7295	2.446	1.83168	2.30103	0.877295	0.908652	0.795143	2.30103	87.7295	90.8652	79.5143			200	2.42548	1.7799	1.63135	2.30103	0.90455	0.934036	0.826635	2.30103	90.455	93.4036	82.6635
	2														2
	Absorbance				log[Concentration(uM)] vs Normalized data				log[Concentration(uM)] vs %viability						Absorbance				log[Concentration(uM)] vs Normalized data				log[Concentration(uM)] vs %viability
	Concentration(uM)	Set 1	Set 2	Set 3	log[Concentration(uM)]	Set 1	Set 2	Set 3	log[Concentration(uM)]	Set 1	Set 2	Set 3			Concentration(uM)	Set 1	Set 2	Set 3	log[Concentration(uM)]	Set 1	Set 2	Set 3	log[Concentration(uM)]	Set 1	Set 2	Set 3
	0	2.4984	2.9547	2.5099	#NUM!	1.164	0.948296	1.12139							0	2.90016	2.39925	2.41906	#NUM!	0.945426	1.12752	1.06708	#NUM!
	1	2.1464	3.1158	2.2382	0	1	1	1	0	100	100	100			1	3.06757	2.1279	2.26699	0	1	1	1	0	100	100	100
	5	2.0824	2.587	2.00774	0.69897	0.970183	0.830284	0.89703	0.69897	97.0183	83.0284	89.703			5	2.64006	2.15555	2.04096	0.69897	0.860636	1.01299	0.900296	0.69897	86.0636	101.299	90.0296
	10	1.9628	2.5688	1.90287	1	0.914461	0.824443	0.850178	1	91.4461	82.4443	85.0178			10	2.62324	1.98455	1.96888	1	0.855152	0.932633	0.868501	1	85.5152	93.2633	86.8501
	20	1.8778	2.5559	1.90077	1.30103	0.87486	0.820303	0.849237	1.30103	87.486	82.0303	84.9237			20	2.60781	1.86666	1.88519	1.30103	0.850123	0.877231	0.831584	1.30103	85.0123	87.7231	83.1584
	50	1.8177	2.5306	1.83299	1.69897	0.84686	0.812183	0.818956	1.69897	84.686	81.2183	81.8956			50	2.43299	1.79375	1.80397	1.69897	0.793133	0.842965	0.795756	1.69897	79.3133	84.2965	79.5756
	100	1.6622	2.4981	1.65806	2	0.774413	0.801752	0.740801	2	77.4413	80.1752	74.0801			100	2.55748	1.6803	1.68171	2	0.833714	0.789649	0.741825	2	83.3714	78.9649	74.1825
	200	1.5853	2.3768	1.60812	2.30103	0.738586	0.762822	0.718488	2.30103	73.8586	76.2822	71.8488			200	2.35635	1.71913	1.6176	2.30103	0.768149	0.807898	0.713547	2.30103	76.8149	80.7898	71.3547
